# Supplementary material for: A tale of three SARS-CoV-2 variants with independently acquired P681H mutations in New York State
Source: bioRxiv or medRxiv preprint supplement (doi:10.1101/2021.03.10.21253285), 2021-03-12
Supplement: Supplementary file [file media-1.pdf]

We gratefully acknowledge the following Authors from the Originating laboratories responsible for obtaining the specimens, as well as the Submitting laboratories where the genome data were generated and shared via GISAID, on which this research is based.

All Submitters of data may be contacted directly via [www.gisaid.org](http://www.gisaid.org)

Authors are sorted alphabetically.

| Accession ID                                                                                                                                                        | Originating Laboratory                                                      | Submitting Laboratory                                                          | Authors                                                                                                                                                                                                                                                                                                                                                                                                                                                                                                                                                                                                                                                                                                                                                           |
|---------------------------------------------------------------------------------------------------------------------------------------------------------------------|-----------------------------------------------------------------------------|--------------------------------------------------------------------------------|-------------------------------------------------------------------------------------------------------------------------------------------------------------------------------------------------------------------------------------------------------------------------------------------------------------------------------------------------------------------------------------------------------------------------------------------------------------------------------------------------------------------------------------------------------------------------------------------------------------------------------------------------------------------------------------------------------------------------------------------------------------------|
| EPI_ISL_1005568, EPI_ISL_1005657<br>EPI_ISL_1008604                                                                                                                 | Instituto Nacional de Medicina Genomica<br>Wyoming Public Health Laboratory | Instituto Nacional de Medicina Genomica<br>Wyoming Public Health Laboratory    | Hidalgo-Miranda A, Mendoza-Vargas A, Reyes-Grajeda JP, Cisneros-Villanueva M, Cedro-Tanda A, Peñaloza-Figueroa F, Herrera-Montalvo LA<br>Noah Hull, Taylor Fearing, Lynette Gumbleton, Channing Weber, Ashley Norberg, Bailey Bowcutt, and Wanda Manley                                                                                                                                                                                                                                                                                                                                                                                                                                                                                                           |
| EPI_ISL_1009434, EPI_ISL_1009436,<br>EPI_ISL_1009437, EPI_ISL_1009463,<br>EPI_ISL_1009475, EPI_ISL_1009521,<br>EPI_ISL_1009548, EPI_ISL_1009592                     | Erie County Public Health (ECPHL)                                           | University at Buffalo Genomics and Bioinformatics Core                         | Jonathan Bard, Natalie Lamb, Alyssa Pohlman, Brandon Marzullo, Amanda Boccolucci, Norma Nowak, Donald Yergeau, Jennifer Surtees                                                                                                                                                                                                                                                                                                                                                                                                                                                                                                                                                                                                                                   |
| EPI_ISL_1009622                                                                                                                                                     | School of Pharmacy, Shenandoah University                                   | School of Pharmacy, Shenandoah University                                      | Adams,S.M., Harralson,A.F., Kidd,R.S., Sawyer,G.W.                                                                                                                                                                                                                                                                                                                                                                                                                                                                                                                                                                                                                                                                                                                |
| EPI_ISL_1009632, EPI_ISL_1009639,<br>EPI_ISL_1009642                                                                                                                | DPHL                                                                        | Delaware Public Health Lab                                                     | Gregory Hovan                                                                                                                                                                                                                                                                                                                                                                                                                                                                                                                                                                                                                                                                                                                                                     |
| EPI_ISL_1011090                                                                                                                                                     | Fulgent Genetics                                                            | Fulgent Genetics                                                               | Harry Gao, Micky Li, John Gao, Joseph Fierro, Benafsh Sapra, Becky Tsai, Yan Meng, Doreen Ng, James Xie                                                                                                                                                                                                                                                                                                                                                                                                                                                                                                                                                                                                                                                           |
| EPI_ISL_1011555                                                                                                                                                     | Massachusetts General Hospital                                              | Infectious Disease Program, Broad Institute of Harvard and MIT                 | Lemieux,J.E., Siddle,K.J., Shaw,B., Adams,G., Pierce,V., Turbett,S., Anahtar,M., Branda,J., Slater,D., Harris,J., Lin,A.E., Gladden-Young,A., Lagerborg,K., Rudy,M., DeRuff,K., Carter,A., Normandin,E., Bauer,M., Reilly,S., Tomkins-Tinch,C., Loreth,C., Chaluvadi,S., Neumann,A., Cusick,C., Chapman,S.B., Gnirke,A., Flowers,K., Cerrato,F., Birren,B.W., Gallagher,G., Smole,S., Park,D.J., MacInnis,B.L., Ryan,E., LaRocque,R., Rosenberg,E. and Sabeti,P.C.                                                                                                                                                                                                                                                                                                |
| EPI_ISL_1011639                                                                                                                                                     | Warrior Diagnostics Laboratory                                              | Infectious Disease Program, Broad Institute of Harvard and MIT                 | Lemieux,J.E., Siddle,K.J., Marshall,J., O'Neill,M., Bronson,A., Adams,G., Gladden-Young,A., Lagerborg,K., Rudy,M., DeRuff,K., Carter,A., Normandin,E., Bauer,M., Reilly,S., Tomkins-Tinch,C., Loreth,C., Chaluvadi,S., Birren,B.W., Gallagher,G., Smole,S., Park,D.J., MacInnis,B.L., and Sabeti,P.C.                                                                                                                                                                                                                                                                                                                                                                                                                                                             |
| EPI_ISL_1011703                                                                                                                                                     | Broad Institute Clinical Research Sequencing Platform                       | Infectious Disease Program, Broad Institute of Harvard and MIT                 | Lemieux,J.E., Siddle,K.J., Adams,G., Gladden-Young,A., Lagerborg,K., Rudy,M., DeRuff,K., Carter,A., Normandin,E., Bauer,M., Reilly,S., Tomkins-Tinch,C., Loreth,C., Chaluvadi,S., Birren,B.W., Gallagher,G., Smole,S., Park,D.J., MacInnis,B.L., and Sabeti,P.C.                                                                                                                                                                                                                                                                                                                                                                                                                                                                                                  |
| EPI_ISL_1012904, EPI_ISL_1012909,<br>EPI_ISL_1012910, EPI_ISL_1012913                                                                                               | New Mexico Department of Health Scientific Laboratory                       | New Mexico Department of Health Scientific Laboratory                          | Elle Johnson, Anastacia Griego-Fisher, D'eldra Malone, Jennifer Benoit                                                                                                                                                                                                                                                                                                                                                                                                                                                                                                                                                                                                                                                                                            |
| EPI_ISL_1014649                                                                                                                                                     | Dutch COVID-19 response team                                                | National Institute for Public Health and the Environment (RIVM)                | Adam Meijer, Harry Vennema, Dirk Eggink, Jeroen Cremer, Sharon van den Brink, Bas van der Veer, AnneMarie van den Brandt, Florian Zwagemaker, Dennis Schmitz, Chantal Reusken, on behalf of the national COVID-19 response team                                                                                                                                                                                                                                                                                                                                                                                                                                                                                                                                   |
| EPI_ISL_1014785, EPI_ISL_1014799                                                                                                                                    | University of Michigan Clinical Microbiology Laboratory                     | Lauring Lab, University of Michigan, Department of Microbiology and Immunology | Valesano                                                                                                                                                                                                                                                                                                                                                                                                                                                                                                                                                                                                                                                                                                                                                          |
| EPI_ISL_1015494, EPI_ISL_1015498,<br>EPI_ISL_1015500                                                                                                                | City of Milwaukee Health Department Laboratory                              | City of Milwaukee Health Department Laboratory                                 | Sanjib Bhattacharyya                                                                                                                                                                                                                                                                                                                                                                                                                                                                                                                                                                                                                                                                                                                                              |
| EPI_ISL_1015592, EPI_ISL_1015608,<br>EPI_ISL_1015630                                                                                                                | Maryland Public Health Laboratory                                           | Maryland Public Health Laboratory                                              | Maryland Department of Health Laboratories Administration                                                                                                                                                                                                                                                                                                                                                                                                                                                                                                                                                                                                                                                                                                         |
| EPI_ISL_1015654, EPI_ISL_1015664,<br>EPI_ISL_1015665, EPI_ISL_1015666,<br>EPI_ISL_1015670, EPI_ISL_1015672,<br>EPI_ISL_1015684, EPI_ISL_1015687,<br>EPI_ISL_1015710 | Columbia University Irving Medical Center                                   | Wadsworth Center, New York State Department of Health                          | Kirsten St. George, Daryl M. Lamson, Alexis Russel, Matthew Shudt, Melissa A Leisner, Jonathan Plitnick, Navjot Singh, John Kelly, Erasmus Schneider, Erica Lasek-Nesselquist                                                                                                                                                                                                                                                                                                                                                                                                                                                                                                                                                                                     |
| EPI_ISL_1015813                                                                                                                                                     | Altius Institute for Biomedical Sciences                                    | Seattle Flu Study                                                              | Deborah A. Nickerson, Chris D. Frazar, Jover Lee, Benjamin Pelle, Erica Ryke, Matthew Richardson, Amanda Adler, Elisabeth Brandstetter, Peter D. Han, Kairsten Fay, Misja Ilcisin, Kirsten Lacombe, Thomas R. Sibley, Melissa Truong, Caitlin R. Wolf, Ryan Alexander, Daniel Bates, Rebecca Bruders, Stephanie DeBaun, Clem Green, Muhammad Halimun, Jessica Halow, Kneshay Harper, Matt Hartman, Andrew Meuser, Alex Nguyen, Truong Nguyen, Sofia Olsson, Sadie Patraw, Hannah Petersen, Tobias Ragoczy, Joshua Richards, Jacob Rodriguez, John Stamatoyannopoulos, Julia Wald, Olivia Waltner, Michael Boeckh, Janet A. Englund, Michael Famulare, Barry R. Lutz, Mark J. Rieder, Lea M. Starita, Matthew Thompson, Helen Y. Chu, Jay Shendure, Trevor Bedford |
| EPI_ISL_1015885                                                                                                                                                     | Seattle Flu Study                                                           | Seattle Flu Study                                                              | Deborah A. Nickerson, Chris D. Frazar, Jover Lee, Benjamin Pelle, Erica Ryke, Matthew Richardson, Amanda Adler, Elisabeth Brandstetter, Peter D. Han, Kairsten Fay, Misja Ilcisin, Kirsten Lacombe, Thomas R. Sibley, Melissa Truong, Caitlin R. Wolf, Karen Cowgill, Stephanie Schrag, Jeff Duchin, Michael Boeckh, Janet A. Englund, Michael Famulare, Barry R. Lutz, Mark J. Rieder, Lea M. Starita, Matthew Thompson, Helen Y. Chu, Trevor Bedford, Jay Shendure                                                                                                                                                                                                                                                                                              |
| EPI_ISL_1015896, EPI_ISL_1015898,<br>EPI_ISL_1015955                                                                                                                | Altius Institute for Biomedical Sciences                                    | Seattle Flu Study                                                              | Deborah A. Nickerson, Chris D. Frazar, Jover Lee, Benjamin Pelle, Erica Ryke, Matthew Richardson, Amanda Adler, Elisabeth Brandstetter, Peter D. Han, Kairsten Fay, Misja Ilcisin, Kirsten Lacombe, Thomas R. Sibley, Melissa Truong, Caitlin R. Wolf, Ryan Alexander, Daniel Bates, Rebecca Bruders, Stephanie DeBaun, Clem Green, Muhammad Halimun, Jessica Halow, Kneshay Harper, Matt Hartman, Andrew Meuser, Alex Nguyen, Truong Nguyen, Sofia Olsson, Sadie Patraw, Hannah Petersen, Tobias Ragoczy, Joshua Richards, Jacob Rodriguez, John Stamatoyannopoulos, Julia Wald, Olivia Waltner, Michael Boeckh, Janet A. Englund, Michael Famulare, Barry R. Lutz, Mark J. Rieder, Lea M. Starita, Matthew Thompson, Helen Y. Chu, Jay Shendure, Trevor Bedford |
| EPI_ISL_1016102, EPI_ISL_1016103,<br>EPI_ISL_1016104                                                                                                                | URMC LABS                                                                   | Wadsworth Center, New York State Department of Health                          | Kirsten St. George, Daryl M. Lamson, Alexis Russel, Matthew Shudt, Melissa A Leisner, Jonathan Plitnick, Navjot Singh, John Kelly, Erasmus Schneider, Erica Lasek-Nesselquist                                                                                                                                                                                                                                                                                                                                                                                                                                                                                                                                                                                     |
| EPI_ISL_1016111, EPI_ISL_1016113,<br>EPI_ISL_1016117                                                                                                                | Columbia University Irving Medical Center                                   | Wadsworth Center, New York State Department of Health                          | Kirsten St. George, Daryl M. Lamson, Alexis Russel, Matthew Shudt, Melissa A Leisner, Jonathan Plitnick, Navjot Singh, John Kelly, Erasmus Schneider, Erica Lasek-Nesselquist                                                                                                                                                                                                                                                                                                                                                                                                                                                                                                                                                                                     |
| EPI_ISL_1016121                                                                                                                                                     | URMC LABS                                                                   | Wadsworth Center, New York State Department of Health                          | Kirsten St. George, Daryl M. Lamson, Alexis Russel, Matthew Shudt, Melissa A Leisner, Jonathan Plitnick, Navjot Singh, John Kelly, Erasmus Schneider, Erica Lasek-Nesselquist                                                                                                                                                                                                                                                                                                                                                                                                                                                                                                                                                                                     |
| EPI_ISL_1016132, EPI_ISL_1016135,<br>EPI_ISL_1016137                                                                                                                | THE MARY IMOGENE BASSETT HOSPITAL                                           | Wadsworth Center, New York State Department of Health                          | Kirsten St. George, Daryl M. Lamson, Alexis Russel, Matthew Shudt, Melissa A Leisner, Jonathan Plitnick, Navjot Singh, John Kelly, Erasmus Schneider, Erica Lasek-Nesselquist                                                                                                                                                                                                                                                                                                                                                                                                                                                                                                                                                                                     |
| EPI_ISL_1016140, EPI_ISL_1016143,<br>EPI_ISL_1016147, EPI_ISL_1016156,<br>EPI_ISL_1016161, EPI_ISL_1016162,<br>EPI_ISL_1016167, EPI_ISL_1016168                     | NORTHWELL HEALTH LABORATORIES                                               | Wadsworth Center, New York State Department of Health                          | Kirsten St. George, Daryl M. Lamson, Alexis Russel, Matthew Shudt, Melissa A Leisner, Jonathan Plitnick, Navjot Singh, John Kelly, Erasmus Schneider, Erica Lasek-Nesselquist                                                                                                                                                                                                                                                                                                                                                                                                                                                                                                                                                                                     |
| EPI_ISL_1016169                                                                                                                                                     | TEMPUS LABS INC                                                             | Wadsworth Center, New York State Department of Health                          | Kirsten St. George, Daryl M. Lamson, Alexis Russel, Matthew Shudt, Melissa A Leisner, Jonathan Plitnick, Navjot Singh, John Kelly, Erasmus Schneider, Erica Lasek-Nesselquist                                                                                                                                                                                                                                                                                                                                                                                                                                                                                                                                                                                     |
| EPI_ISL_1016193, EPI_ISL_1016210                                                                                                                                    | MONTEFIORE MEDICAL CENTER LABORATORIES                                      | Wadsworth Center, New York State Department of Health                          | Kirsten St. George, Daryl M. Lamson, Alexis Russel, Matthew Shudt, Melissa A Leisner, Jonathan Plitnick, Navjot Singh, John Kelly, Erasmus Schneider,                                                                                                                                                                                                                                                                                                                                                                                                                                                                                                                                                                                                             |

|                                                                                                                                                                                                                                                                                                                                                                     |                                                                                                          |                                                                                                    |                                                                                                                                                                                                                                                                                                                                                                                                                                                                                                                                                                                                 |
|---------------------------------------------------------------------------------------------------------------------------------------------------------------------------------------------------------------------------------------------------------------------------------------------------------------------------------------------------------------------|----------------------------------------------------------------------------------------------------------|----------------------------------------------------------------------------------------------------|-------------------------------------------------------------------------------------------------------------------------------------------------------------------------------------------------------------------------------------------------------------------------------------------------------------------------------------------------------------------------------------------------------------------------------------------------------------------------------------------------------------------------------------------------------------------------------------------------|
| EPI_ISL_1016221, EPI_ISL_1016222, EPI_ISL_1016225, EPI_ISL_1016233, EPI_ISL_1016236, EPI_ISL_1016240, EPI_ISL_1016244, EPI_ISL_1016248                                                                                                                                                                                                                              | New York Presbyterian Hospital                                                                           | Wadsworth Center, New York State Department of Health                                              | Kirsten St. George, Daryl M. Lamson, Alexis Russel, Matthew Shudt, Melissa A Leisner, Jonathan Plitnick, Navjot Singh, John Kelly, Erasmus Schneider, Erica Lasek-Nesselquist                                                                                                                                                                                                                                                                                                                                                                                                                   |
| EPI_ISL_1016254                                                                                                                                                                                                                                                                                                                                                     | TEMPUS LABS INC                                                                                          | Wadsworth Center, New York State Department of Health                                              | Kirsten St. George, Daryl M. Lamson, Alexis Russel, Matthew Shudt, Melissa A Leisner, Jonathan Plitnick, Navjot Singh, John Kelly, Erasmus Schneider, Erica Lasek-Nesselquist                                                                                                                                                                                                                                                                                                                                                                                                                   |
| EPI_ISL_1016260                                                                                                                                                                                                                                                                                                                                                     | Columbia University Irving Medical Center                                                                | Wadsworth Center, New York State Department of Health                                              | Kirsten St. George, Daryl M. Lamson, Alexis Russel, Matthew Shudt, Melissa A Leisner, Jonathan Plitnick, Navjot Singh, John Kelly, Erasmus Schneider, Erica Lasek-Nesselquist                                                                                                                                                                                                                                                                                                                                                                                                                   |
| EPI_ISL_1016263, EPI_ISL_1016266, EPI_ISL_1016271, EPI_ISL_1016273                                                                                                                                                                                                                                                                                                  | New York Presbyterian Hospital                                                                           | Wadsworth Center, New York State Department of Health                                              | Kirsten St. George, Daryl M. Lamson, Alexis Russel, Matthew Shudt, Melissa A Leisner, Jonathan Plitnick, Navjot Singh, John Kelly, Erasmus Schneider, Erica Lasek-Nesselquist                                                                                                                                                                                                                                                                                                                                                                                                                   |
| EPI_ISL_1016289, EPI_ISL_1016291                                                                                                                                                                                                                                                                                                                                    | Columbia University Irving Medical Center                                                                | Wadsworth Center, New York State Department of Health                                              | Kirsten St. George, Daryl M. Lamson, Alexis Russel, Matthew Shudt, Melissa A Leisner, Jonathan Plitnick, Navjot Singh, John Kelly, Erasmus Schneider, Erica Lasek-Nesselquist                                                                                                                                                                                                                                                                                                                                                                                                                   |
| EPI_ISL_1016298, EPI_ISL_1016317, EPI_ISL_1016321, EPI_ISL_1016322                                                                                                                                                                                                                                                                                                  | SUNY UPSTATE MEDICAL UNIVERSITY                                                                          | Wadsworth Center, New York State Department of Health                                              | Kirsten St. George, Daryl M. Lamson, Alexis Russel, Matthew Shudt, Melissa A Leisner, Jonathan Plitnick, Navjot Singh, John Kelly, Erasmus Schneider, Erica Lasek-Nesselquist                                                                                                                                                                                                                                                                                                                                                                                                                   |
| EPI_ISL_1016325                                                                                                                                                                                                                                                                                                                                                     | Columbia University Irving Medical Center                                                                | Wadsworth Center, New York State Department of Health                                              | Kirsten St. George, Daryl M. Lamson, Alexis Russel, Matthew Shudt, Melissa A Leisner, Jonathan Plitnick, Navjot Singh, John Kelly, Erasmus Schneider, Erica Lasek-Nesselquist                                                                                                                                                                                                                                                                                                                                                                                                                   |
| EPI_ISL_1016340                                                                                                                                                                                                                                                                                                                                                     | WESTCHESTER MEDICAL CENTER                                                                               | Wadsworth Center, New York State Department of Health                                              | Kirsten St. George, Daryl M. Lamson, Alexis Russel, Matthew Shudt, Melissa A Leisner, Jonathan Plitnick, Navjot Singh, John Kelly, Erasmus Schneider, Erica Lasek-Nesselquist                                                                                                                                                                                                                                                                                                                                                                                                                   |
| EPI_ISL_1016350, EPI_ISL_1016355, EPI_ISL_1016360                                                                                                                                                                                                                                                                                                                   | URMC LABS                                                                                                | Wadsworth Center, New York State Department of Health                                              | Kirsten St. George, Daryl M. Lamson, Alexis Russel, Matthew Shudt, Melissa A Leisner, Jonathan Plitnick, Navjot Singh, John Kelly, Erasmus Schneider, Erica Lasek-Nesselquist                                                                                                                                                                                                                                                                                                                                                                                                                   |
| EPI_ISL_1016368, EPI_ISL_1016369, EPI_ISL_1016371                                                                                                                                                                                                                                                                                                                   | New York Presbyterian Hospital                                                                           | Wadsworth Center, New York State Department of Health                                              | Kirsten St. George, Daryl M. Lamson, Alexis Russel, Matthew Shudt, Melissa A Leisner, Jonathan Plitnick, Navjot Singh, John Kelly, Erasmus Schneider, Erica Lasek-Nesselquist                                                                                                                                                                                                                                                                                                                                                                                                                   |
| EPI_ISL_1016378                                                                                                                                                                                                                                                                                                                                                     | WESTCHESTER MEDICAL CENTER                                                                               | Wadsworth Center, New York State Department of Health                                              | Kirsten St. George, Daryl M. Lamson, Alexis Russel, Matthew Shudt, Melissa A Leisner, Jonathan Plitnick, Navjot Singh, John Kelly, Erasmus Schneider, Erica Lasek-Nesselquist                                                                                                                                                                                                                                                                                                                                                                                                                   |
| EPI_ISL_1016382                                                                                                                                                                                                                                                                                                                                                     | New York Presbyterian Hospital                                                                           | Wadsworth Center, New York State Department of Health                                              | Kirsten St. George, Daryl M. Lamson, Alexis Russel, Matthew Shudt, Melissa A Leisner, Jonathan Plitnick, Navjot Singh, John Kelly, Erasmus Schneider, Erica Lasek-Nesselquist                                                                                                                                                                                                                                                                                                                                                                                                                   |
| EPI_ISL_1016404                                                                                                                                                                                                                                                                                                                                                     | MEMORIAL SLOAN KETTERING CANCER CENTER                                                                   | Wadsworth Center, New York State Department of Health                                              | Kirsten St. George, Daryl M. Lamson, Alexis Russel, Matthew Shudt, Melissa A Leisner, Jonathan Plitnick, Navjot Singh, John Kelly, Erasmus Schneider, Erica Lasek-Nesselquist                                                                                                                                                                                                                                                                                                                                                                                                                   |
| EPI_ISL_1016424, EPI_ISL_1016436, EPI_ISL_1016437, EPI_ISL_1016442, EPI_ISL_1016446, EPI_ISL_1016447, EPI_ISL_1016454, EPI_ISL_1016455, EPI_ISL_1016457                                                                                                                                                                                                             | URMC LABS                                                                                                | Wadsworth Center, New York State Department of Health                                              | Kirsten St. George, Daryl M. Lamson, Alexis Russel, Matthew Shudt, Melissa A Leisner, Jonathan Plitnick, Navjot Singh, John Kelly, Erasmus Schneider, Erica Lasek-Nesselquist                                                                                                                                                                                                                                                                                                                                                                                                                   |
| EPI_ISL_1016460, EPI_ISL_1016461, EPI_ISL_1016463, EPI_ISL_1016465, EPI_ISL_1016467                                                                                                                                                                                                                                                                                 | STONY BROOK UNIVERSITY HOSPITAL                                                                          | Wadsworth Center, New York State Department of Health                                              | Kirsten St. George, Daryl M. Lamson, Alexis Russel, Matthew Shudt, Melissa A Leisner, Jonathan Plitnick, Navjot Singh, John Kelly, Erasmus Schneider, Erica Lasek-Nesselquist                                                                                                                                                                                                                                                                                                                                                                                                                   |
| EPI_ISL_1016468, EPI_ISL_1016473, EPI_ISL_1016474, EPI_ISL_1016475                                                                                                                                                                                                                                                                                                  | ALBANY MEDICAL CENTER HOSPITAL CLINICAL LABORATORIES                                                     | Wadsworth Center, New York State Department of Health                                              | Kirsten St. George, Daryl M. Lamson, Alexis Russel, Matthew Shudt, Melissa A Leisner, Jonathan Plitnick, Navjot Singh, John Kelly, Erasmus Schneider, Erica Lasek-Nesselquist                                                                                                                                                                                                                                                                                                                                                                                                                   |
| EPI_ISL_1016579, EPI_ISL_1016672                                                                                                                                                                                                                                                                                                                                    | Helix/Illumina                                                                                           | Respiratory Viruses Branch, Division of Viral Diseases, Centers for Disease Control and Prevention | Peter W. Cook, Dakota Howard, Dhvani Batra, Ben L. Rambo-Martin, Eileen de Feo, Jan Antico, Christine Tran, Matthew Tolentino, Shannon Wickline, Kim Gietzen, Brad Sickler, Jingtao Liu, Eric Allen, Phil Febbo, Summer Galloway, Nicole L. Washington, Simon White, Geraint Levan, Kelly Schiabor Barrett, Elizabeth Cirulli, Alexandre Bolze, Ary Ascencio, Charlotte Rivera-Garcia, Ryan Cho, Jason Nguyen, Sherry Wang, Jimmy Ramirez, Tyler Cassens, Efrén Sandoval, Magnus Isaksson, William Lee, David Becker, Marc Laurent, James Lu, Clinton R. Paden, Suxiang Tong, Duncan MacCannell |
| EPI_ISL_1016915, EPI_ISL_1016937                                                                                                                                                                                                                                                                                                                                    | Arizona State Public Health Laboratory                                                                   | Arizona State Public Health Laboratory                                                             | Trung Huynh, Jessica Escobar, Katherine Fullerton, Nobuko Fukushima, Stacy White, Linda Getsinger, Victor Waddell                                                                                                                                                                                                                                                                                                                                                                                                                                                                               |
| EPI_ISL_1016993, EPI_ISL_1016996                                                                                                                                                                                                                                                                                                                                    | South Dakota Public Health Laboratory                                                                    | University of Minnesota Genomics Center                                                            | Daryl M. Gohl, Benjamin Auch, John Garbe, Jaquelyn Kuriger-Laber, Corbin Dirxx, and Chris Carlson                                                                                                                                                                                                                                                                                                                                                                                                                                                                                               |
| EPI_ISL_1017168                                                                                                                                                                                                                                                                                                                                                     | Providence Regional Medical Center Everett                                                               | Providence St. Joseph Health Molecular Genomics Laboratory                                         | Alexa K Dowdell, Brian D Piening, Fred L Robinson, Carlo B Bifulco, Mary Campbell                                                                                                                                                                                                                                                                                                                                                                                                                                                                                                               |
| EPI_ISL_1017267                                                                                                                                                                                                                                                                                                                                                     | Providence Oregon Regional Laboratories                                                                  | Providence St. Joseph Health Molecular Genomics Laboratory                                         | Alexa K Dowdell, Brian D Piening, Fred L Robinson, Carlo B Bifulco, Mary Campbell                                                                                                                                                                                                                                                                                                                                                                                                                                                                                                               |
| EPI_ISL_1017475, EPI_ISL_1017484, EPI_ISL_1017486, EPI_ISL_1017493, EPI_ISL_1017494, EPI_ISL_1017499, EPI_ISL_1017503, EPI_ISL_1017504, EPI_ISL_1017505, EPI_ISL_1017512, EPI_ISL_1017516, EPI_ISL_1017518, EPI_ISL_1017568                                                                                                                                         | Murphy Medical Associates                                                                                | Grubaugh Lab - Yale School of Public Health                                                        | Mary Petrone, Joseph Fauver, Caleb Neal, Steven Murphy, Chantal Vogels, Mallery Breban, Annie Watkins, Tara Alpert, Nathan Grubaugh                                                                                                                                                                                                                                                                                                                                                                                                                                                             |
| EPI_ISL_1017772                                                                                                                                                                                                                                                                                                                                                     | University of Wisconsin-Madison AIDS Vaccine Research Laboratories                                       | University of Wisconsin-Madison AIDS Vaccine Research Laboratories                                 | Gage Moreno, Katarina Braun, et al. AIDS Vaccine Research Laboratories                                                                                                                                                                                                                                                                                                                                                                                                                                                                                                                          |
| EPI_ISL_1017850                                                                                                                                                                                                                                                                                                                                                     | Wyoming Public Health Laboratory                                                                         | Wyoming Public Health Laboratory                                                                   | Noah Hull, Taylor Fearing, Lynette Gumbleton, Channing Weber, Ashley Norberg, Bailey Bowcutt, and Wanda Manley                                                                                                                                                                                                                                                                                                                                                                                                                                                                                  |
| EPI_ISL_1017975                                                                                                                                                                                                                                                                                                                                                     | DOHMH Corona                                                                                             | New York City Public Health Laboratory                                                             | Jade Wang, et al.                                                                                                                                                                                                                                                                                                                                                                                                                                                                                                                                                                               |
| EPI_ISL_1018018                                                                                                                                                                                                                                                                                                                                                     | DOHMH Jamaica                                                                                            | New York City Public Health Laboratory                                                             | Jade Wang, et al.                                                                                                                                                                                                                                                                                                                                                                                                                                                                                                                                                                               |
| EPI_ISL_1020491, EPI_ISL_1020495, EPI_ISL_1020496, EPI_ISL_1020501, EPI_ISL_1020508, EPI_ISL_1020519, EPI_ISL_1020531, EPI_ISL_1020532, EPI_ISL_1020533, EPI_ISL_1020540, EPI_ISL_1020543, EPI_ISL_1020548                                                                                                                                                          | Columbia University Irving Medical Center                                                                | Wadsworth Center, New York State Department of Health                                              | Kirsten St. George, Daryl M. Lamson, Alexis Russel, Matthew Shudt, Melissa A Leisner, Jonathan Plitnick, Navjot Singh, John Kelly, Erasmus Schneider, Erica Lasek-Nesselquist                                                                                                                                                                                                                                                                                                                                                                                                                   |
| EPI_ISL_1020747, EPI_ISL_1020757, EPI_ISL_1020790, EPI_ISL_1020791, EPI_ISL_1020799, EPI_ISL_1020858, EPI_ISL_1021221, EPI_ISL_1021240, EPI_ISL_1021252, EPI_ISL_1021256, EPI_ISL_1021261, EPI_ISL_1021288, EPI_ISL_1021359, EPI_ISL_1021379, EPI_ISL_1021758, EPI_ISL_1021772, EPI_ISL_1021940, EPI_ISL_1021955, EPI_ISL_1022131, EPI_ISL_1022142, EPI_ISL_1022196 | Laboratory Corporation of America                                                                        | Respiratory Viruses Branch, Division of Viral Diseases, Centers for Disease Control and Prevention | Peter W. Cook, Dakota Howard, Dhvani Batra, Ben L. Rambo-Martin, Clinton R. Paden, Suxiang Tong, Duncan MacCannell                                                                                                                                                                                                                                                                                                                                                                                                                                                                              |
| EPI_ISL_1022861                                                                                                                                                                                                                                                                                                                                                     | Department of Virus and Microbiological Special Diagnostics, Statens Serum Institut, Copenhagen, Denmark | Aalborg University                                                                                 | Danish Covid-19 Genome Consortium                                                                                                                                                                                                                                                                                                                                                                                                                                                                                                                                                               |
| EPI_ISL_1023686                                                                                                                                                                                                                                                                                                                                                     | Wyoming Public Health Laboratory                                                                         | Wyoming Public Health Laboratory                                                                   | Noah Hull, Taylor Fearing, Lynette Gumbleton, Channing Weber, Ashley Norberg, Bailey Bowcutt, and Wanda Manley                                                                                                                                                                                                                                                                                                                                                                                                                                                                                  |
| EPI_ISL_1026848                                                                                                                                                                                                                                                                                                                                                     | Laboratory Corporation of America                                                                        | Respiratory Viruses Branch, Division of Viral Diseases, Centers for Disease Control and Prevention | Peter W. Cook, Dakota Howard, Dhvani Batra, Ben L. Rambo-Martin, Clinton R. Paden, Suxiang Tong, Duncan MacCannell                                                                                                                                                                                                                                                                                                                                                                                                                                                                              |
| EPI_ISL_1026900, EPI_ISL_1027131, EPI_ISL_1027149                                                                                                                                                                                                                                                                                                                   | Fulgent Genetics                                                                                         | Fulgent Genetics                                                                                   | Harry Gao, Mickey Li, John Gao, Joseph Fierro, Benafsh Sapra, Becky Tsai, Yan Meng, Doreen Ng, James Xie                                                                                                                                                                                                                                                                                                                                                                                                                                                                                        |
| EPI_ISL_1027289                                                                                                                                                                                                                                                                                                                                                     | Vault Health                                                                                             | Minnesota Department of Health, Public Health Laboratory                                           | Alexandra Lorentz, Jacob Garfin, Matt Plumb, and Xiong Wang                                                                                                                                                                                                                                                                                                                                                                                                                                                                                                                                     |

|                                                                                                                                                                                                                                                                                                                                                                                                                                                                                                                                                                                                                                                                                                                         |                                                                    |                                                                                                    |                                                                                                                                                                                                                                                                                                                                                                                                                                                                                                                                                                                                                                                                                                                                                                    |
|-------------------------------------------------------------------------------------------------------------------------------------------------------------------------------------------------------------------------------------------------------------------------------------------------------------------------------------------------------------------------------------------------------------------------------------------------------------------------------------------------------------------------------------------------------------------------------------------------------------------------------------------------------------------------------------------------------------------------|--------------------------------------------------------------------|----------------------------------------------------------------------------------------------------|--------------------------------------------------------------------------------------------------------------------------------------------------------------------------------------------------------------------------------------------------------------------------------------------------------------------------------------------------------------------------------------------------------------------------------------------------------------------------------------------------------------------------------------------------------------------------------------------------------------------------------------------------------------------------------------------------------------------------------------------------------------------|
| EPI_ISL_1027378                                                                                                                                                                                                                                                                                                                                                                                                                                                                                                                                                                                                                                                                                                         | Orange County Public Health Lab                                    | Chan-Zuckerberg Biohub                                                                             | CZB Ciliahub Consortium                                                                                                                                                                                                                                                                                                                                                                                                                                                                                                                                                                                                                                                                                                                                            |
| EPI_ISL_1027687, EPI_ISL_1027698, EPI_ISL_1027704, EPI_ISL_1027737, EPI_ISL_1027765, EPI_ISL_1027768, EPI_ISL_1027772, EPI_ISL_1027811, EPI_ISL_1028071, EPI_ISL_1029070, EPI_ISL_1029074, EPI_ISL_1029076, EPI_ISL_1029105, EPI_ISL_1029111, EPI_ISL_1029120, EPI_ISL_1029199, EPI_ISL_1029201, EPI_ISL_1029209, EPI_ISL_1029236, EPI_ISL_1029280, EPI_ISL_1029282, EPI_ISL_1029311, EPI_ISL_1029313, EPI_ISL_1029333, EPI_ISL_1029339, EPI_ISL_1029348, EPI_ISL_1029360, EPI_ISL_1029394, EPI_ISL_1029461, EPI_ISL_1029473, EPI_ISL_1029474, EPI_ISL_1029494, EPI_ISL_1029509, EPI_ISL_1029710, EPI_ISL_1029712, EPI_ISL_1029760, EPI_ISL_1029764, EPI_ISL_1029818, EPI_ISL_1029830, EPI_ISL_1029872, EPI_ISL_1029883 |                                                                    |                                                                                                    |                                                                                                                                                                                                                                                                                                                                                                                                                                                                                                                                                                                                                                                                                                                                                                    |
| see above                                                                                                                                                                                                                                                                                                                                                                                                                                                                                                                                                                                                                                                                                                               | Laboratory Corporation of America                                  | Respiratory Viruses Branch, Division of Viral Diseases, Centers for Disease Control and Prevention | Peter W. Cook, Dakota Howard, Dhvani Batra, Ben L. Rambo-Martin, Clinton R. Paden, Suxiang Tong, Duncan MacCannell                                                                                                                                                                                                                                                                                                                                                                                                                                                                                                                                                                                                                                                 |
| EPI_ISL_1029986, EPI_ISL_1030027, EPI_ISL_1030036, EPI_ISL_1030046, EPI_ISL_1030054, EPI_ISL_1030133, EPI_ISL_1030230                                                                                                                                                                                                                                                                                                                                                                                                                                                                                                                                                                                                   | Florida Bureau of Public Health Laboratories                       | Florida Bureau of Public Health Laboratories                                                       | Sarah Schmedes, Jason Blanton                                                                                                                                                                                                                                                                                                                                                                                                                                                                                                                                                                                                                                                                                                                                      |
| EPI_ISL_1030550, EPI_ISL_1030743, EPI_ISL_1030765, EPI_ISL_1030767, EPI_ISL_1030824, EPI_ISL_1030910, EPI_ISL_1030914, EPI_ISL_1031895, EPI_ISL_1031915, EPI_ISL_1031919, EPI_ISL_1031980, EPI_ISL_1031995, EPI_ISL_1032051, EPI_ISL_1032059, EPI_ISL_1032062, EPI_ISL_1032067, EPI_ISL_1032074, EPI_ISL_1032142, EPI_ISL_1032146, EPI_ISL_1032151, EPI_ISL_1032168, EPI_ISL_1032174, EPI_ISL_1032221, EPI_ISL_1032227, EPI_ISL_1032256, EPI_ISL_1032330, EPI_ISL_1032352, EPI_ISL_1032368, EPI_ISL_1032378, EPI_ISL_1032382, EPI_ISL_1032391, EPI_ISL_1032422, EPI_ISL_1032432, EPI_ISL_1032465, EPI_ISL_1032485, EPI_ISL_1032497, EPI_ISL_1032518, EPI_ISL_1032580                                                    |                                                                    |                                                                                                    |                                                                                                                                                                                                                                                                                                                                                                                                                                                                                                                                                                                                                                                                                                                                                                    |
| see above                                                                                                                                                                                                                                                                                                                                                                                                                                                                                                                                                                                                                                                                                                               | Laboratory Corporation of America                                  | Respiratory Viruses Branch, Division of Viral Diseases, Centers for Disease Control and Prevention | Peter W. Cook, Dakota Howard, Dhvani Batra, Ben L. Rambo-Martin, Clinton R. Paden, Suxiang Tong, Duncan MacCannell                                                                                                                                                                                                                                                                                                                                                                                                                                                                                                                                                                                                                                                 |
| EPI_ISL_1032643                                                                                                                                                                                                                                                                                                                                                                                                                                                                                                                                                                                                                                                                                                         | Wyoming Public Health Laboratory                                   | Wyoming Public Health Laboratory                                                                   | Noah Hull, Taylor Fearing, Lynette Gumbleton, Channing Weber, Ashley Norberg, Bailey Bowcutt, and Wanda Manley                                                                                                                                                                                                                                                                                                                                                                                                                                                                                                                                                                                                                                                     |
| EPI_ISL_1032813, EPI_ISL_1032830, EPI_ISL_1032890, EPI_ISL_1032891                                                                                                                                                                                                                                                                                                                                                                                                                                                                                                                                                                                                                                                      | Illinois Department of Public Health                               | Gagnon Lab, Southern Illinois University                                                           | Keith Gagnon                                                                                                                                                                                                                                                                                                                                                                                                                                                                                                                                                                                                                                                                                                                                                       |
| EPI_ISL_1034856                                                                                                                                                                                                                                                                                                                                                                                                                                                                                                                                                                                                                                                                                                         | Landesamt für Verbraucherschutz Sachsen Anhalt, Magdeburg          | Institute of Medical Microbiology and Hospital Hygiene                                             | Prof. Dr. Achim Kaasch, Aljoscha Tersteegen                                                                                                                                                                                                                                                                                                                                                                                                                                                                                                                                                                                                                                                                                                                        |
| EPI_ISL_1036273, EPI_ISL_1036306, EPI_ISL_1036307, EPI_ISL_1036325, EPI_ISL_1036333, EPI_ISL_1036340, EPI_ISL_1036342                                                                                                                                                                                                                                                                                                                                                                                                                                                                                                                                                                                                   | Johns Hopkins Hospital Department of Pathology                     | Johns Hopkins Hospital Department of Pathology                                                     | C. Paul Morris, Chun Huai Luo, Adannaya Amadi, Matthew Schwartz, Nicholas Gallagher, Heba H. Mostafa                                                                                                                                                                                                                                                                                                                                                                                                                                                                                                                                                                                                                                                               |
| EPI_ISL_1036481                                                                                                                                                                                                                                                                                                                                                                                                                                                                                                                                                                                                                                                                                                         | TGen North                                                         | Sonora Quest Laboratories                                                                          | "Jolene Bowers, Megan Folkerts, Chris French, Hayley Yaglom, Ashlyn Pfeiffer, Darrin Lemmer, Dave Engelthaler, The Arizona COVID Genomics Union (ACGU)"                                                                                                                                                                                                                                                                                                                                                                                                                                                                                                                                                                                                            |
| EPI_ISL_1036571                                                                                                                                                                                                                                                                                                                                                                                                                                                                                                                                                                                                                                                                                                         | TGen North                                                         | TGen North                                                                                         | "Jolene Bowers, Megan Folkerts, Chris French, Hayley Yaglom, Ashlyn Pfeiffer, Darrin Lemmer, Dave Engelthaler, The Arizona COVID Genomics Union (ACGU)"                                                                                                                                                                                                                                                                                                                                                                                                                                                                                                                                                                                                            |
| EPI_ISL_1036672                                                                                                                                                                                                                                                                                                                                                                                                                                                                                                                                                                                                                                                                                                         | Wyoming Public Health Laboratory                                   | Wyoming Public Health Laboratory                                                                   | Noah Hull, Taylor Fearing, Lynette Gumbleton, Channing Weber, Ashley Norberg, Bailey Bowcutt, and Wanda Manley                                                                                                                                                                                                                                                                                                                                                                                                                                                                                                                                                                                                                                                     |
| EPI_ISL_1036851                                                                                                                                                                                                                                                                                                                                                                                                                                                                                                                                                                                                                                                                                                         | US Air Force School of Aerospace Medicine                          | US Air Force School of Aerospace Medicine                                                          | Anthony Fries, Jennifer Meyer, William Gruner, William Buggele, Amanda Javorina, Sarah Purves, Clarise Starr, Elizabeth Macias                                                                                                                                                                                                                                                                                                                                                                                                                                                                                                                                                                                                                                     |
| EPI_ISL_1036955, EPI_ISL_1036961, EPI_ISL_1036968, EPI_ISL_1036970, EPI_ISL_1036991, EPI_ISL_1037159, EPI_ISL_1037219, EPI_ISL_1037254, EPI_ISL_1038303, EPI_ISL_1038355, EPI_ISL_1038420, EPI_ISL_1038442, EPI_ISL_1038457, EPI_ISL_1038458, EPI_ISL_1038466, EPI_ISL_1038524, EPI_ISL_1038536, EPI_ISL_1038542, EPI_ISL_1038551, EPI_ISL_1038565, EPI_ISL_1038571, EPI_ISL_1038650, EPI_ISL_1038671, EPI_ISL_1038706, EPI_ISL_1038708                                                                                                                                                                                                                                                                                 |                                                                    |                                                                                                    |                                                                                                                                                                                                                                                                                                                                                                                                                                                                                                                                                                                                                                                                                                                                                                    |
| see above                                                                                                                                                                                                                                                                                                                                                                                                                                                                                                                                                                                                                                                                                                               | Laboratory Corporation of America                                  | Respiratory Viruses Branch, Division of Viral Diseases, Centers for Disease Control and Prevention | Peter W. Cook, Dakota Howard, Dhvani Batra, Ben L. Rambo-Martin, Clinton R. Paden, Suxiang Tong, Duncan MacCannell                                                                                                                                                                                                                                                                                                                                                                                                                                                                                                                                                                                                                                                 |
| EPI_ISL_1038807, EPI_ISL_1038833, EPI_ISL_1038835, EPI_ISL_1038841                                                                                                                                                                                                                                                                                                                                                                                                                                                                                                                                                                                                                                                      | Maryland Public Health Laboratory                                  | Maryland Public Health Laboratory                                                                  | Maryland Department of Health Laboratories Administration                                                                                                                                                                                                                                                                                                                                                                                                                                                                                                                                                                                                                                                                                                          |
| EPI_ISL_1038846, EPI_ISL_1038847, EPI_ISL_1038855, EPI_ISL_1038879, EPI_ISL_1038915                                                                                                                                                                                                                                                                                                                                                                                                                                                                                                                                                                                                                                     | Colorado Department of Public Health and Environment               | Colorado Department of Public Health and Environment                                               | Laura Bankers, Molly C. Hetherington-Rauth, Diana Ir, Shannon Ely, Shannon R. Matzinger, Sarah Elizabeth Totten, Emily A. Travanty                                                                                                                                                                                                                                                                                                                                                                                                                                                                                                                                                                                                                                 |
| EPI_ISL_1038971                                                                                                                                                                                                                                                                                                                                                                                                                                                                                                                                                                                                                                                                                                         | Tempus                                                             | Grubaugh Lab - Yale School of Public Health                                                        | Joseph Fauver, Tara Alpert, Anderson Brito, Mallory Breban, Anne Wyllie, Chantal Vogels, Mary Petrone, Annie Watkins, Chaney Kalinich, Isabel Ott, Nathan Grubaugh                                                                                                                                                                                                                                                                                                                                                                                                                                                                                                                                                                                                 |
| EPI_ISL_1039641                                                                                                                                                                                                                                                                                                                                                                                                                                                                                                                                                                                                                                                                                                         | LSUHS Emerging Viral Threat Laboratory                             | Microbial Genome Sequencing Center                                                                 | Jeremy P. Kamil, Jennifer L. Carroll, Maarten Van Diest, Andrew D. Yurochko, Rona S. Scott, Christopher G. Kevill, Daniel J. Snyder, Vaughn S. Cooper, John A. Vanchiere                                                                                                                                                                                                                                                                                                                                                                                                                                                                                                                                                                                           |
| EPI_ISL_1039892, EPI_ISL_1039896                                                                                                                                                                                                                                                                                                                                                                                                                                                                                                                                                                                                                                                                                        | University of Wisconsin-Madison AIDS Vaccine Research Laboratories | University of Wisconsin-Madison AIDS Vaccine Research Laboratories                                 | Gage Moreno, Katarina Braun, et al. AIDS Vaccine Research Laboratories                                                                                                                                                                                                                                                                                                                                                                                                                                                                                                                                                                                                                                                                                             |
| EPI_ISL_1040177                                                                                                                                                                                                                                                                                                                                                                                                                                                                                                                                                                                                                                                                                                         | USC Clinical Lab                                                   | Los Angeles County PHL                                                                             | P. Hemarajata et al.                                                                                                                                                                                                                                                                                                                                                                                                                                                                                                                                                                                                                                                                                                                                               |
| EPI_ISL_1040580, EPI_ISL_1040592, EPI_ISL_1040594, EPI_ISL_1040597, EPI_ISL_1040606, EPI_ISL_1040609, EPI_ISL_1040614, EPI_ISL_1040636                                                                                                                                                                                                                                                                                                                                                                                                                                                                                                                                                                                  | Instituto Nacional de Medicina Genomica                            | Instituto Nacional de Medicina Genomica                                                            | Hidalgo-Miranda A, Mendoza-Vargas A, Reyes-Grajeda JP, Cisneros-Villanueva M, Cedro-Tanda A, Peñafoza-Figueroa F, Alcaraz-Millman M, Herrera-Montalvo LA                                                                                                                                                                                                                                                                                                                                                                                                                                                                                                                                                                                                           |
| EPI_ISL_1040856, EPI_ISL_1040862, EPI_ISL_1040879, EPI_ISL_1040906                                                                                                                                                                                                                                                                                                                                                                                                                                                                                                                                                                                                                                                      | NYU Langone Health                                                 | Departments of Pathology and Medicine, New York University School of Medicine                      | Adriana Heguy, Dacia Dimartino, Emily Guzman, Christian Marier, Peter Meyn, Sitharam Ramaswami, Gael Westby, Paul Zappile, Yutong Zhang, Paolo Cotzia, Guiqing Wang                                                                                                                                                                                                                                                                                                                                                                                                                                                                                                                                                                                                |
| EPI_ISL_1041043, EPI_ISL_1041045, EPI_ISL_1041060, EPI_ISL_1041061, EPI_ISL_1041063, EPI_ISL_1041064, EPI_ISL_1041065, EPI_ISL_1041066, EPI_ISL_1041067, EPI_ISL_1041081, EPI_ISL_1041092                                                                                                                                                                                                                                                                                                                                                                                                                                                                                                                               |                                                                    |                                                                                                    |                                                                                                                                                                                                                                                                                                                                                                                                                                                                                                                                                                                                                                                                                                                                                                    |
| see above                                                                                                                                                                                                                                                                                                                                                                                                                                                                                                                                                                                                                                                                                                               | Innovative Genomics Institute, UC Berkeley                         | Innovative Genomics Institute, UC Berkeley                                                         | Stacia Wyman, Haridha Shivram, Phil Frankino, Liana Lareau                                                                                                                                                                                                                                                                                                                                                                                                                                                                                                                                                                                                                                                                                                         |
| EPI_ISL_1041224, EPI_ISL_1041244, EPI_ISL_1041246, EPI_ISL_1041260, EPI_ISL_1041271, EPI_ISL_1041316, EPI_ISL_1041349, EPI_ISL_1041354, EPI_ISL_1041423, EPI_ISL_1041436, EPI_ISL_1041451, EPI_ISL_1041573, EPI_ISL_1041613, EPI_ISL_1041648, EPI_ISL_1041677, EPI_ISL_1041679, EPI_ISL_1041866                                                                                                                                                                                                                                                                                                                                                                                                                         |                                                                    |                                                                                                    |                                                                                                                                                                                                                                                                                                                                                                                                                                                                                                                                                                                                                                                                                                                                                                    |
| see above                                                                                                                                                                                                                                                                                                                                                                                                                                                                                                                                                                                                                                                                                                               | Pandemic Response Lab - NYC                                        | Pandemic Response Lab, R&D                                                                         | Henry Lee, Michael Hammerling, Melissa Hopkins, Cybill del Castillo, William Ward, Pradeep Bugga, Haiping Hao, Jon Laurent                                                                                                                                                                                                                                                                                                                                                                                                                                                                                                                                                                                                                                         |
| EPI_ISL_1048633, EPI_ISL_1048634, EPI_ISL_1048635, EPI_ISL_1048636                                                                                                                                                                                                                                                                                                                                                                                                                                                                                                                                                                                                                                                      | Maine HETL                                                         | Tewhey Lab, The Jackson Laboratory                                                                 | Matluk,N., Dewey,H., Iosue,F., Barter,M., Lynch,R., Munger,H. and Tewhey,R.                                                                                                                                                                                                                                                                                                                                                                                                                                                                                                                                                                                                                                                                                        |
| EPI_ISL_1049235                                                                                                                                                                                                                                                                                                                                                                                                                                                                                                                                                                                                                                                                                                         | Utah Public Health Laboratory                                      | Utah Public Health Laboratory                                                                      | Erin L. Young, Kelly F. Oakeson, Tara Gallagher                                                                                                                                                                                                                                                                                                                                                                                                                                                                                                                                                                                                                                                                                                                    |
| EPI_ISL_1049521, EPI_ISL_1049598                                                                                                                                                                                                                                                                                                                                                                                                                                                                                                                                                                                                                                                                                        | Seattle Flu Study                                                  | Fred Hutchinson Cancer Research Center                                                             | Deborah A. Nickerson, Chris D. Frazier, Jover Lee, Benjamin Pelle, Erica Ryke, Matthew Richardson, Amanda Adler, Elisabeth Brandstetter, Peter D. Han, Kairsten Fay, Misja Ilcisin, Kirsten Lacombe, Thomas R. Sibley, Melissa Truong, Caitlin R. Wolf, Karen Cowgill, Stephanie Schrag, Jeff Duchin, Michael Boeckh, Janet A. Englund, Michael Famulare, Barry R. Lutz, Mark J. Rieder, Lea M. Starita, Matthew Thompson, Helen Y. Chu, Trevor Bedford, Jay Shendure                                                                                                                                                                                                                                                                                              |
| EPI_ISL_1049711, EPI_ISL_1049757, EPI_ISL_1049760, EPI_ISL_1049791, EPI_ISL_1049823                                                                                                                                                                                                                                                                                                                                                                                                                                                                                                                                                                                                                                     | Altius Institute for Biomedical Sciences                           | Fred Hutchinson Cancer Research Center                                                             | Deborah A. Nickerson, Chris D. Frazier, Jover Lee, Benjamin Pelle, Erica Ryke, Matthew Richardson, Amanda Adler, Elisabeth Brandstetter, Peter D. Han, Kairsten Fay, Misja Ilcisin, Kirsten Lacombe, Thomas R. Sibley, Melissa Truong, Caitlin R. Wolf, Ryan Alexander, Daniel Bates, Rebecca Bruders, Stephanie DeBaun, Clem Green, Muhammad Halimun, Jessica Halow, Kneshay Harper, Matt Hartman, Andrew Meuser, Alex Nguyen, Truong Nguyen, Sofia Olsson, Sadie Patraw, Hannah Petersen, Tobias Ragoczy, Joshua Richards, Jacob Rodriguez, John Stamatoyannopoulos, Julia Wald, Olivia Waltner, Michael Boeckh, Janet A. Englund, Michael Famulare, Barry R. Lutz, Mark J. Rieder, Lea M. Starita, Matthew Thompson, Helen Y. Chu, Jay Shendure, Trevor Bedford |
| EPI_ISL_1049848                                                                                                                                                                                                                                                                                                                                                                                                                                                                                                                                                                                                                                                                                                         | Kansas Health and Environmental Lab                                | Kansas Health and Environmental Lab                                                                | Mike Grose, Paige Drury, Carissa Robertson, Ben Olsen, and Phil Adam                                                                                                                                                                                                                                                                                                                                                                                                                                                                                                                                                                                                                                                                                               |

|                                                                                                                                                                                                                                                                                                                                                                                                                                                                                                                                                                |                                                                          |                                                                                                                                                                                                                                                                              |                                                                                                                                                                                                                                                                                                                                                                                                                                                      |
|----------------------------------------------------------------------------------------------------------------------------------------------------------------------------------------------------------------------------------------------------------------------------------------------------------------------------------------------------------------------------------------------------------------------------------------------------------------------------------------------------------------------------------------------------------------|--------------------------------------------------------------------------|------------------------------------------------------------------------------------------------------------------------------------------------------------------------------------------------------------------------------------------------------------------------------|------------------------------------------------------------------------------------------------------------------------------------------------------------------------------------------------------------------------------------------------------------------------------------------------------------------------------------------------------------------------------------------------------------------------------------------------------|
| EPI_ISL_1049927                                                                                                                                                                                                                                                                                                                                                                                                                                                                                                                                                | Florida Bureau of Public Health Laboratories                             | Florida Bureau of Public Health Laboratories                                                                                                                                                                                                                                 | Sarah Schmedes, Jason Blanton                                                                                                                                                                                                                                                                                                                                                                                                                        |
| EPI_ISL_1050041, EPI_ISL_1050043, EPI_ISL_1050060                                                                                                                                                                                                                                                                                                                                                                                                                                                                                                              | NYU Langone Health                                                       | Departments of Pathology and Medicine, New York University School of Medicine                                                                                                                                                                                                | Adriana Heguy, Dacia Dimartino, Emily Guzman, Christian Marier, Peter Meyn, Sitharam Ramaswami, Gael Westby, Paul Zappile, Yutong Zhang, Paolo Cotzia, Guiqing Wang                                                                                                                                                                                                                                                                                  |
| EPI_ISL_1054968, EPI_ISL_1054974, EPI_ISL_1054992                                                                                                                                                                                                                                                                                                                                                                                                                                                                                                              | Instituto de Diagnostico y Referencia Epidemiologicos INDRE_RNLSP        | Instituto de Diagnostico y Referencia Epidemiologicos (INDRE)                                                                                                                                                                                                                | Claudia Wong-Arambula, Abril Rodriguez-Maldonado, Fabiola Garces-Ayala, Adnan Araiza-Rodriguez, David Frago-Fonseca, Sergio Rangel-Guerrero, Mayra Jimenez-Morales, Nancy Munoz-Hernandez, Natividad Cruz-Ortiz, Tatiana Nunez-Garcia, Gisela Barrera-Badillo, Lucia Hernandez-Rivas, Irma Lopez-Martinez, Ernesto Ramirez-Gonzalez.                                                                                                                 |
| EPI_ISL_1055007                                                                                                                                                                                                                                                                                                                                                                                                                                                                                                                                                | Instituto Nacional de Medicina Genomica                                  | Instituto Nacional de Medicina Genomica                                                                                                                                                                                                                                      | Hidalgo-Miranda A, Mendoza-Vargas A, Reyes-Grajeda JP, Cedro-Tanda A, Alcaraz N, Gonzalez-Barrera D, Rangel-DeLeon D, Ramirez-Vega O, Sifuentes-Rojas C, Cisneros-Villanueva M, Herrera-Montalvo LA                                                                                                                                                                                                                                                  |
| EPI_ISL_1055435                                                                                                                                                                                                                                                                                                                                                                                                                                                                                                                                                | Dr. Leonard A. Miller Centre for Health Services                         | National Microbiology Laboratory (NML)                                                                                                                                                                                                                                       | Anna Majer, Shari Tyson, Grace Seo, Philip Mabon, Elsie Grudeski, Rhiannon Huzarewich, Russell Mandes, Anneliese Landgraff, Jennifer Tanner, Natalie Knox, Morag Graham, Gary Van Domselaar, Robert Needle, Yang Yu, Adel Malek, Laura Gilbert, George Zahariadis, Nathalie Bastien, Yan Li, Timothy Booth, Darian Hole, Madison Chapel, Kirsten Biggar, Kerr Smith, CanCOGeN's metadata curation team, Public Health Agency of Canada CanCOGeN team |
| EPI_ISL_1055498, EPI_ISL_1055669                                                                                                                                                                                                                                                                                                                                                                                                                                                                                                                               | QEII Health Sciences Centre                                              | National Microbiology Laboratory (NML)                                                                                                                                                                                                                                       | Anna Majer, Shari Tyson, Grace Seo, Philip Mabon, Elsie Grudeski, Rhiannon Huzarewich, Russell Mandes, Anneliese Landgraff, Jennifer Tanner, Natalie Knox, Morag Graham, Gary Van Domselaar, Todd Hatchette, Jason LeBlanc, Janice Pettipas, Dan Gaston, Nathalie Bastien, Yan Li, Timothy Booth, Darian Hole, Madison Chapel, Kirsten Biggar, CanCOGeN's metadata curation team, Public Health Agency of Canada CanCOGeN team                       |
| EPI_ISL_1058046                                                                                                                                                                                                                                                                                                                                                                                                                                                                                                                                                | Instituto Nacional de Medicina Genomica                                  | Instituto Nacional de Medicina Genomica                                                                                                                                                                                                                                      | Hidalgo-Miranda A, Mendoza-Vargas A, Reyes-Grajeda JP, Cedro-Tanda A, Alcaraz N, Gonzalez-Barrera D, Rangel-DeLeon D, Ramirez-Vega O, Sifuentes-Rojas C, Cisneros-Villanueva M, Herrera-Montalvo LA                                                                                                                                                                                                                                                  |
| EPI_ISL_1058071                                                                                                                                                                                                                                                                                                                                                                                                                                                                                                                                                | Kansas Health and Environmental Lab                                      | Kansas Health and Environmental Lab                                                                                                                                                                                                                                          | Mike Grose, Paige Drury, Carissa Robertson, Ben Olsen, and Phil Adam                                                                                                                                                                                                                                                                                                                                                                                 |
| EPI_ISL_1058821, EPI_ISL_1058882, EPI_ISL_1058899, EPI_ISL_1058901, EPI_ISL_1058905                                                                                                                                                                                                                                                                                                                                                                                                                                                                            | Michigan Department of Health and Human Services, Bureau of Laboratories | Michigan Department of Health and Human Services, Bureau of Laboratories                                                                                                                                                                                                     | Blankenship HM, Riner D, Soehnlén MK                                                                                                                                                                                                                                                                                                                                                                                                                 |
| EPI_ISL_1059128, EPI_ISL_1059135                                                                                                                                                                                                                                                                                                                                                                                                                                                                                                                               | University of Michigan Clinical Microbiology Laboratory                  | Lauring Lab, University of Michigan, Department of Microbiology and Immunology                                                                                                                                                                                               | Valesano                                                                                                                                                                                                                                                                                                                                                                                                                                             |
| EPI_ISL_1060073                                                                                                                                                                                                                                                                                                                                                                                                                                                                                                                                                | Innovative Genomics Institute, UC Berkeley                               | Innovative Genomics Institute, UC Berkeley                                                                                                                                                                                                                                   | Stacia Wyman, Alison Ciling, Netravathi Krishnappa, Haridha Shivram, Phil Frankino, Liana Lareau                                                                                                                                                                                                                                                                                                                                                     |
| EPI_ISL_1060317                                                                                                                                                                                                                                                                                                                                                                                                                                                                                                                                                | Wyoming Public Health Laboratory                                         | Wyoming Public Health Laboratory                                                                                                                                                                                                                                             | Jim Mildenerberger, Wanda Manley, Noah Hull, Taylor Fearing, Lynette Gumbleton, Channing Weber, Ashley Norberg, Chayse Rowley, Marley Goetz, Brian Dominguez, Elliot Thomasson, Cari Sloma, and Rob Christensen                                                                                                                                                                                                                                      |
| EPI_ISL_1060552                                                                                                                                                                                                                                                                                                                                                                                                                                                                                                                                                | Santa Clara County Public Health Laboratory                              | Santa Clara County Public Health Laboratory                                                                                                                                                                                                                                  | Santa Clara County Public Health Department                                                                                                                                                                                                                                                                                                                                                                                                          |
| EPI_ISL_1060598                                                                                                                                                                                                                                                                                                                                                                                                                                                                                                                                                | Instituto Nacional de Medicina Genomica                                  | Instituto Nacional de Medicina Genomica                                                                                                                                                                                                                                      | Hidalgo-Miranda A, Mendoza-Vargas A, Reyes-Grajeda JP, Cedro-Tanda A, Alcaraz N, Gonzalez-Barrera D, Rangel-DeLeon D, Ramirez-Vega O, Sifuentes-Rojas C, Cisneros-Villanueva M, Herrera-Montalvo LA                                                                                                                                                                                                                                                  |
| EPI_ISL_1060634, EPI_ISL_1060645, EPI_ISL_1060666                                                                                                                                                                                                                                                                                                                                                                                                                                                                                                              | NYU Langone Health                                                       | Departments of Pathology and Medicine, New York University School of Medicine                                                                                                                                                                                                | Adriana Heguy, Dacia Dimartino, Emily Guzman, Christian Marier, Peter Meyn, Sitharam Ramaswami, Gael Westby, Paul Zappile, Yutong Zhang, Paolo Cotzia, Guiqing Wang                                                                                                                                                                                                                                                                                  |
| EPI_ISL_1064225, EPI_ISL_1064232                                                                                                                                                                                                                                                                                                                                                                                                                                                                                                                               | New Mexico Department of Health Scientific Laboratory                    | Center for Global Health, University of New Mexico Health Sciences Center                                                                                                                                                                                                    | Daryl Domman, Kurt Schwalm, Twila Kunde, Joseph Hicks, Anastacia Griego, Michael Edwards, Darrell Dinwiddie                                                                                                                                                                                                                                                                                                                                          |
| EPI_ISL_1064252, EPI_ISL_1064255                                                                                                                                                                                                                                                                                                                                                                                                                                                                                                                               | University of Wisconsin-Madison AIDS Vaccine Research Laboratories       | University of Wisconsin-Madison AIDS Vaccine Research Laboratories                                                                                                                                                                                                           | Gage Moreno, Katarina Braun, et al. AIDS Vaccine Research Laboratories                                                                                                                                                                                                                                                                                                                                                                               |
| EPI_ISL_1064359, EPI_ISL_1064366, EPI_ISL_1064367, EPI_ISL_1064369                                                                                                                                                                                                                                                                                                                                                                                                                                                                                             | Maryland Public Health Laboratory                                        | Maryland Public Health Laboratory                                                                                                                                                                                                                                            | Maryland Department of Health Laboratories Administration                                                                                                                                                                                                                                                                                                                                                                                            |
| EPI_ISL_1064390                                                                                                                                                                                                                                                                                                                                                                                                                                                                                                                                                | Vault Health                                                             | Minnesota Department of Health, Public Health Laboratory                                                                                                                                                                                                                     | Alexandra Lorentz, Jacob Garfin, Matt Plumb, and Xiong Wang                                                                                                                                                                                                                                                                                                                                                                                          |
| EPI_ISL_1064501                                                                                                                                                                                                                                                                                                                                                                                                                                                                                                                                                | M Health Fairview                                                        | Minnesota Department of Health, Public Health Laboratory                                                                                                                                                                                                                     | Alexandra Lorentz, Jacob Garfin, Matt Plumb, and Xiong Wang                                                                                                                                                                                                                                                                                                                                                                                          |
| EPI_ISL_1064518                                                                                                                                                                                                                                                                                                                                                                                                                                                                                                                                                | Vault Health                                                             | Minnesota Department of Health, Public Health Laboratory                                                                                                                                                                                                                     | Alexandra Lorentz, Jacob Garfin, Matt Plumb, and Xiong Wang                                                                                                                                                                                                                                                                                                                                                                                          |
| EPI_ISL_1064725                                                                                                                                                                                                                                                                                                                                                                                                                                                                                                                                                | Kansas Health and Environmental Lab                                      | Kansas Health and Environmental Lab                                                                                                                                                                                                                                          | Mike Grose, Paige Drury, Carissa Robertson, Ben Olsen, and Phil Adam                                                                                                                                                                                                                                                                                                                                                                                 |
| EPI_ISL_1064873                                                                                                                                                                                                                                                                                                                                                                                                                                                                                                                                                | DOHMH Corona                                                             | New York City Public Health Laboratory                                                                                                                                                                                                                                       | Jade Wang, et al.                                                                                                                                                                                                                                                                                                                                                                                                                                    |
| EPI_ISL_1064910                                                                                                                                                                                                                                                                                                                                                                                                                                                                                                                                                | OCME Office Of Chief Medical Examiner                                    | New York City Public Health Laboratory                                                                                                                                                                                                                                       | Jade Wang, et al.                                                                                                                                                                                                                                                                                                                                                                                                                                    |
| EPI_ISL_1064924, EPI_ISL_1064925                                                                                                                                                                                                                                                                                                                                                                                                                                                                                                                               | New Mexico Department of Health Scientific Laboratory                    | Center for Global Health, University of New Mexico Health Sciences Center                                                                                                                                                                                                    | Daryl Domman, Kurt Schwalm, Twila Kunde, Joseph Hicks, Anastacia Griego, Michael Edwards, Darrell Dinwiddie                                                                                                                                                                                                                                                                                                                                          |
| EPI_ISL_1066777                                                                                                                                                                                                                                                                                                                                                                                                                                                                                                                                                | Arizona State Public Health Laboratory                                   | Arizona State Public Health Laboratory                                                                                                                                                                                                                                       | Trung Huynh, Jessica Escobar, Katherine Fullerton, Nobuko Fukushima, Stacy White, Linda Getsinger, Victor Waddell                                                                                                                                                                                                                                                                                                                                    |
| EPI_ISL_1067589                                                                                                                                                                                                                                                                                                                                                                                                                                                                                                                                                | HOSPITAL DR. FERNANDO ESCALANTE PRADILLA                                 | Incienza, Instituto Costarricense de Investigación y Enseñanza en Nutrición y Salud                                                                                                                                                                                          | Francisco Duarte, Hebleen Porras, Claudio Soto-Garita, Estela Cordero, Adriana Godínez, Melany Calderón, Caterina Guzmán, Nazareth Ruiz & Nicole Vargas-Viquez                                                                                                                                                                                                                                                                                       |
| EPI_ISL_1067692                                                                                                                                                                                                                                                                                                                                                                                                                                                                                                                                                | Murphy Medical Associates                                                | Grubaug Lab - Yale School of Public Health                                                                                                                                                                                                                                   | Mary Petrone, Joseph Fauver, Caleb Neal, Steven Murphy, Chantal Vogels, Mallery Breban, Annie Watkins, Tara Alpert, Nathan Grubaug                                                                                                                                                                                                                                                                                                                   |
| EPI_ISL_1067853, EPI_ISL_1067869, EPI_ISL_1067875, EPI_ISL_1067887                                                                                                                                                                                                                                                                                                                                                                                                                                                                                             | Wisconsin State Laboratory of Hygiene Communicable Disease Division      | Wisconsin State Laboratory of Hygiene Communicable Disease Division                                                                                                                                                                                                          | Kelsey R. Florek, Abigail C. Shockey                                                                                                                                                                                                                                                                                                                                                                                                                 |
| EPI_ISL_1068057                                                                                                                                                                                                                                                                                                                                                                                                                                                                                                                                                | Utah Public Health Laboratory                                            | Utah Public Health Laboratory                                                                                                                                                                                                                                                | Erin L. Young, Kelly F. Oakeson, Tara Gallagher                                                                                                                                                                                                                                                                                                                                                                                                      |
| EPI_ISL_1068432, EPI_ISL_1068460, EPI_ISL_1068470, EPI_ISL_1068501, EPI_ISL_1068547, EPI_ISL_1068707, EPI_ISL_1068973, EPI_ISL_1069140                                                                                                                                                                                                                                                                                                                                                                                                                         | Fulgent Genetics                                                         | Fulgent Genetics                                                                                                                                                                                                                                                             | Harry Gao, Mickey Li, John Gao, Joseph Fierro, Benafsh Sapra, Becky Tsai, Yan Meng, Doreen Ng, James Xie                                                                                                                                                                                                                                                                                                                                             |
| EPI_ISL_1074463, EPI_ISL_1074496, EPI_ISL_1074565, EPI_ISL_1074677, EPI_ISL_1075533, EPI_ISL_1075648, EPI_ISL_1076114, EPI_ISL_1076168, EPI_ISL_1076330, EPI_ISL_1076713, EPI_ISL_1076752, EPI_ISL_1076760, EPI_ISL_1076953, EPI_ISL_1077105, EPI_ISL_1077220, EPI_ISL_1077488, EPI_ISL_1077553, EPI_ISL_1077567, EPI_ISL_1078133, EPI_ISL_1078546, EPI_ISL_1078767, EPI_ISL_1079292, EPI_ISL_1079347, EPI_ISL_1079622, EPI_ISL_1079851, EPI_ISL_1079955, EPI_ISL_1080138, EPI_ISL_1080156, EPI_ISL_1080186, EPI_ISL_1080209, EPI_ISL_1080240, EPI_ISL_1080280 | Houston Methodist Hospital                                               | S. Wesley Long, Randall J. Olsen, Paul A. Christensen, Sishir Subedi, Robert Olson, James J. Davis, Matthew Ojeda Saavedra, Prasanti Yerramilli, Layne Pruitt, Kristina Reppond, Madison N. Shyer, Jessica Cambric, Ilya J. Finkelstein, Jimmy Gollihar, and James M. Musser |                                                                                                                                                                                                                                                                                                                                                                                                                                                      |
| see above                                                                                                                                                                                                                                                                                                                                                                                                                                                                                                                                                      | Houston Methodist Hospital                                               | Houston Methodist Hospital                                                                                                                                                                                                                                                   | S. Wesley Long, Randall J. Olsen, Paul A. Christensen, Sishir Subedi, Robert Olson, James J. Davis, Matthew Ojeda Saavedra, Prasanti Yerramilli, Layne Pruitt, Kristina Reppond, Madison N. Shyer, Jessica Cambric, Ilya J. Finkelstein, Jimmy Gollihar, and James M. Musser                                                                                                                                                                         |
| EPI_ISL_1080343                                                                                                                                                                                                                                                                                                                                                                                                                                                                                                                                                | NJ Rapid Response Teams                                                  | NJ-PHEL                                                                                                                                                                                                                                                                      | Lindsey Bodnar, Shiv Verma, Dana Woell, Byeong Jeong                                                                                                                                                                                                                                                                                                                                                                                                 |
| EPI_ISL_1080360, EPI_ISL_1080423                                                                                                                                                                                                                                                                                                                                                                                                                                                                                                                               | Houston Methodist Hospital                                               | Houston Methodist Hospital                                                                                                                                                                                                                                                   | S. Wesley Long, Randall J. Olsen, Paul A. Christensen, Sishir Subedi, Robert Olson, James J. Davis, Matthew Ojeda Saavedra, Prasanti Yerramilli, Layne Pruitt, Kristina Reppond, Madison N. Shyer, Jessica Cambric, Ilya J. Finkelstein, Jimmy Gollihar, and James M. Musser                                                                                                                                                                         |
| EPI_ISL_1080448, EPI_ISL_1081164                                                                                                                                                                                                                                                                                                                                                                                                                                                                                                                               | Instituto Nacional de Medicina Genomica                                  | Instituto Nacional de Medicina Genomica                                                                                                                                                                                                                                      | Hidalgo-Miranda A, Mendoza-Vargas A, Reyes-Grajeda JP, Cedro-Tanda A, Alcaraz N, Gonzalez-Barrera D, Rangel-DeLeon D, Ramirez-Vega O, Sifuentes-Rojas C, Cisneros-Villanueva M, Herrera-Montalvo LA                                                                                                                                                                                                                                                  |
| EPI_ISL_1081173                                                                                                                                                                                                                                                                                                                                                                                                                                                                                                                                                | Baylor Scott & White-Temple                                              | Baylor Scott & White-Temple                                                                                                                                                                                                                                                  | Ari Rao, Linden Morales, Kimberly Walker, Marcus Volz, Shelby Hendrickson                                                                                                                                                                                                                                                                                                                                                                            |
| EPI_ISL_1081222, EPI_ISL_1081237, EPI_ISL_1081238                                                                                                                                                                                                                                                                                                                                                                                                                                                                                                              | Maryland Public Health Laboratory                                        | Maryland Public Health Laboratory                                                                                                                                                                                                                                            | Maryland Department of Health Laboratories Administration                                                                                                                                                                                                                                                                                                                                                                                            |
| EPI_ISL_1081430                                                                                                                                                                                                                                                                                                                                                                                                                                                                                                                                                | Genomica Lab Molecular, M@xico                                           | Andersen lab at Scripps Research                                                                                                                                                                                                                                             | SEARCH Alliance San Diego with Jonathan Gonzalez Garcia, Jose Roman Chavez Mendez, Jose Horacio Reyna Verdugo, Martín Gonzalez Ibarra, Luis                                                                                                                                                                                                                                                                                                          |

|                                                                                                                                                                                                                                                                                                                                                                                                                                                                                                                                                                                                                                                                                                                                          |                                                                                                              |                                                                                                                                                                                                                            |                                                                                                                                                                                                                                                                                                                                                                                                                                                                                                                                                                                                 |
|------------------------------------------------------------------------------------------------------------------------------------------------------------------------------------------------------------------------------------------------------------------------------------------------------------------------------------------------------------------------------------------------------------------------------------------------------------------------------------------------------------------------------------------------------------------------------------------------------------------------------------------------------------------------------------------------------------------------------------------|--------------------------------------------------------------------------------------------------------------|----------------------------------------------------------------------------------------------------------------------------------------------------------------------------------------------------------------------------|-------------------------------------------------------------------------------------------------------------------------------------------------------------------------------------------------------------------------------------------------------------------------------------------------------------------------------------------------------------------------------------------------------------------------------------------------------------------------------------------------------------------------------------------------------------------------------------------------|
| EPI_ISL_1086279, EPI_ISL_1086285, EPI_ISL_1086287, EPI_ISL_1086347, EPI_ISL_1086444, EPI_ISL_1086461, EPI_ISL_1086498, EPI_ISL_1086551, EPI_ISL_1086563, EPI_ISL_1086588, EPI_ISL_1086623, EPI_ISL_1086807, EPI_ISL_1086914, EPI_ISL_1087028, EPI_ISL_1087100, EPI_ISL_1087107, EPI_ISL_1087152, EPI_ISL_1087209, EPI_ISL_1087248, EPI_ISL_1087450, EPI_ISL_1087533, EPI_ISL_1087553, EPI_ISL_1087563, EPI_ISL_1087701, EPI_ISL_1087714, EPI_ISL_1087920, EPI_ISL_1087993, EPI_ISL_1088091, EPI_ISL_1088092, EPI_ISL_1088108, EPI_ISL_1088182, EPI_ISL_1088233, EPI_ISL_1088235, EPI_ISL_1088245, EPI_ISL_1088255, EPI_ISL_1088262, EPI_ISL_1088292, EPI_ISL_1088303, EPI_ISL_1088343, EPI_ISL_1088378, EPI_ISL_1088402, EPI_ISL_1088490 | Quest Diagnostics Incorporated                                                                               | Respiratory Viruses Branch, Division of Viral Diseases, Centers for Disease Control and Prevention                                                                                                                         | Peter W. Cook, Dakota Howard, Dhvani Batra, Ben L. Rambo-Martin, S. H. Rosenthal, A. Gerasimova, R. M. Kagan, B. Anderson, M. Hua, Y. Liu, L.E. Bernstein, K.E. Livingston, A. Perez, I. A. Shlyakhter, R. V. Rolando, R. Owen, P. Tanpaiboon, F. Lacbawan, Clinton R. Paden, Suxiang Tong, Duncan MacCannell                                                                                                                                                                                                                                                                                   |
| EPI_ISL_1088602, EPI_ISL_1088636, EPI_ISL_1088723, EPI_ISL_1089011, EPI_ISL_1089029, EPI_ISL_1089086, EPI_ISL_1089112, EPI_ISL_1089120, EPI_ISL_1089133, EPI_ISL_1089145, EPI_ISL_1089146, EPI_ISL_1089158, EPI_ISL_1089260                                                                                                                                                                                                                                                                                                                                                                                                                                                                                                              | Helix / Illumina                                                                                             | Respiratory Viruses Branch, Division of Viral Diseases, Centers for Disease Control and Prevention                                                                                                                         | Peter W. Cook, Dakota Howard, Dhvani Batra, Ben L. Rambo-Martin, Eileen de Feo, Jan Antico, Christine Tran, Matthew Tolentino, Shannon Wickline, Kim Gietzen, Brad Sickler, Jingtao Liu, Eric Allen, Phil Febbo, Summer Galloway, Nicole L. Washington, Simon White, Geraint Levan, Kelly Schiabor Barrett, Elizabeth Cirulli, Alexandre Bolze, Ary Ascencio, Charlotte Rivera-Garcia, Ryan Cho, Jason Nguyen, Sherry Wang, Jimmy Ramirez, Tyler Cassens, Efrén Sandoval, Magnus Isaksson, William Lee, David Becker, Marc Laurent, James Lu, Clinton R. Paden, Suxiang Tong, Duncan MacCannell |
| EPI_ISL_1090316, EPI_ISL_1090340, EPI_ISL_1090384, EPI_ISL_1090430, EPI_ISL_1090439, EPI_ISL_1090505, EPI_ISL_1090514, EPI_ISL_1090612, EPI_ISL_1090649, EPI_ISL_1090684, EPI_ISL_1090780, EPI_ISL_1090827, EPI_ISL_1090827, EPI_ISL_1090952, EPI_ISL_1091061, EPI_ISL_1091079                                                                                                                                                                                                                                                                                                                                                                                                                                                           | Quest Diagnostics Incorporated                                                                               | Respiratory Viruses Branch, Division of Viral Diseases, Centers for Disease Control and Prevention                                                                                                                         | Peter W. Cook, Dakota Howard, Dhvani Batra, Ben L. Rambo-Martin, S. H. Rosenthal, A. Gerasimova, R. M. Kagan, B. Anderson, M. Hua, Y. Liu, L.E. Bernstein, K.E. Livingston, A. Perez, I. A. Shlyakhter, R. V. Rolando, R. Owen, P. Tanpaiboon, F. Lacbawan, Clinton R. Paden, Suxiang Tong, Duncan MacCannell                                                                                                                                                                                                                                                                                   |
| EPI_ISL_1091703                                                                                                                                                                                                                                                                                                                                                                                                                                                                                                                                                                                                                                                                                                                          | US Air Force School of Aerospace Medicine                                                                    | US Air Force School of Aerospace Medicine                                                                                                                                                                                  | Anthony Fries, Jennifer Meyer, William Gruner, William Buggele, Amanda Javorina, Sarah Purves, Clarise Starr, Elizabeth Macias                                                                                                                                                                                                                                                                                                                                                                                                                                                                  |
| EPI_ISL_1092002                                                                                                                                                                                                                                                                                                                                                                                                                                                                                                                                                                                                                                                                                                                          | Johns Hopkins Hospital Department of Pathology                                                               | Johns Hopkins Hospital Department of Pathology                                                                                                                                                                             | C. Paul Morris, Chun Huaui Luo, Adannaya Amadi, Matthew Schwartz, Nicholas Gallagher, Heba H. Mostafa                                                                                                                                                                                                                                                                                                                                                                                                                                                                                           |
| EPI_ISL_1093960, EPI_ISL_1094022                                                                                                                                                                                                                                                                                                                                                                                                                                                                                                                                                                                                                                                                                                         | DeRisi Lab, University of California, San Francisco                                                          | DeRisi Lab, University of California, San Francisco                                                                                                                                                                        | Sabrina Mann, Anthea Mitchell, Jamin Liu, Sara Sunshine, Matthew Laurie, Amy Kistler, Manu Vanaerschoot, Patrick Ayscue, Lucy Li, Eric Chow, IDseq Team, James Peng, Carina Marquez, Luis Rubio, Gabriel Chamie, Diane Jones, Jon Jacobo, Susana Rojas, Susy Rojas, Valerie Tulier-Laiwa, Douglas Black, Jackie Martinez, Maya Petersen, Diane Havlir, and Joseph DeRisi                                                                                                                                                                                                                        |
| EPI_ISL_1094411, EPI_ISL_1094412                                                                                                                                                                                                                                                                                                                                                                                                                                                                                                                                                                                                                                                                                                         | LA Office of Public Health Laboratories                                                                      | Respiratory Viruses Branch, Division of Viral Diseases, Centers for Disease Control and Prevention                                                                                                                         | Krista Queen, Yan Li, Ying Tao, Jing Zhang, Anna Uehara, Anna Montmayer, Clinton R. Paden, Peter W. Cook, Rachel Marine, Mili Sheth, Jasmine Padilla, Sarah Nobles, Mark Burroughs, Lori Rowe, Haibin Wang, Ben L. Rambo-Martin, Dhvani Batra, Justin Lee, Suxiang Tong                                                                                                                                                                                                                                                                                                                         |
| EPI_ISL_1094743                                                                                                                                                                                                                                                                                                                                                                                                                                                                                                                                                                                                                                                                                                                          | NE Public Health Laboratory                                                                                  | Respiratory Viruses Branch, Division of Viral Diseases, Centers for Disease Control and Prevention                                                                                                                         | Krista Queen, Yan Li, Ying Tao, Jing Zhang, Anna Uehara, Anna Montmayer, Clinton R. Paden, Peter W. Cook, Rachel Marine, Mili Sheth, Jasmine Padilla, Sarah Nobles, Mark Burroughs, Lori Rowe, Haibin Wang, Ben L. Rambo-Martin, Dhvani Batra, Justin Lee, Suxiang Tong                                                                                                                                                                                                                                                                                                                         |
| EPI_ISL_1094903, EPI_ISL_1094905                                                                                                                                                                                                                                                                                                                                                                                                                                                                                                                                                                                                                                                                                                         | CO Dept. of Public Health and Environment, Lab Services Division                                             | Respiratory Viruses Branch, Division of Viral Diseases, Centers for Disease Control and Prevention                                                                                                                         | Krista Queen, Yan Li, Ying Tao, Jing Zhang, Anna Uehara, Anna Montmayer, Clinton R. Paden, Peter W. Cook, Rachel Marine, Mili Sheth, Jasmine Padilla, Sarah Nobles, Mark Burroughs, Lori Rowe, Haibin Wang, Ben L. Rambo-Martin, Dhvani Batra, Justin Lee, Suxiang Tong                                                                                                                                                                                                                                                                                                                         |
| EPI_ISL_1095010, EPI_ISL_1095031                                                                                                                                                                                                                                                                                                                                                                                                                                                                                                                                                                                                                                                                                                         | MD DOH Laboratories Administration                                                                           | Respiratory Viruses Branch, Division of Viral Diseases, Centers for Disease Control and Prevention                                                                                                                         | Krista Queen, Yan Li, Ying Tao, Jing Zhang, Anna Uehara, Anna Montmayer, Clinton R. Paden, Peter W. Cook, Rachel Marine, Mili Sheth, Jasmine Padilla, Sarah Nobles, Mark Burroughs, Lori Rowe, Haibin Wang, Ben L. Rambo-Martin, Dhvani Batra, Justin Lee, Suxiang Tong                                                                                                                                                                                                                                                                                                                         |
| EPI_ISL_1095201                                                                                                                                                                                                                                                                                                                                                                                                                                                                                                                                                                                                                                                                                                                          | CDPH, Viral and Rickettsial Disease Laboratory                                                               | Respiratory Viruses Branch, Division of Viral Diseases, Centers for Disease Control and Prevention                                                                                                                         | Krista Queen, Yan Li, Ying Tao, Jing Zhang, Anna Uehara, Anna Montmayer, Clinton R. Paden, Peter W. Cook, Rachel Marine, Mili Sheth, Jasmine Padilla, Sarah Nobles, Mark Burroughs, Lori Rowe, Haibin Wang, Ben L. Rambo-Martin, Dhvani Batra, Justin Lee, Suxiang Tong                                                                                                                                                                                                                                                                                                                         |
| EPI_ISL_1095242                                                                                                                                                                                                                                                                                                                                                                                                                                                                                                                                                                                                                                                                                                                          | OR State PHL-Virology/Immunology Section                                                                     | Respiratory Viruses Branch, Division of Viral Diseases, Centers for Disease Control and Prevention                                                                                                                         | Krista Queen, Yan Li, Ying Tao, Jing Zhang, Anna Uehara, Anna Montmayer, Clinton R. Paden, Peter W. Cook, Rachel Marine, Mili Sheth, Jasmine Padilla, Sarah Nobles, Mark Burroughs, Lori Rowe, Haibin Wang, Ben L. Rambo-Martin, Dhvani Batra, Justin Lee, Suxiang Tong                                                                                                                                                                                                                                                                                                                         |
| EPI_ISL_1095286                                                                                                                                                                                                                                                                                                                                                                                                                                                                                                                                                                                                                                                                                                                          | MI - Michigan Department of Health and Human Services - Bureau of Laboratories                               | Respiratory Viruses Branch, Division of Viral Diseases, Centers for Disease Control and Prevention                                                                                                                         | Krista Queen, Yan Li, Ying Tao, Jing Zhang, Anna Uehara, Anna Montmayer, Clinton R. Paden, Peter W. Cook, Rachel Marine, Mili Sheth, Jasmine Padilla, Sarah Nobles, Mark Burroughs, Lori Rowe, Haibin Wang, Ben L. Rambo-Martin, Dhvani Batra, Justin Lee, Suxiang Tong                                                                                                                                                                                                                                                                                                                         |
| EPI_ISL_1095902                                                                                                                                                                                                                                                                                                                                                                                                                                                                                                                                                                                                                                                                                                                          | Fulgent Genetics                                                                                             | Fulgent Genetics                                                                                                                                                                                                           | Harry Gao, Mickey Li, John Gao, Joseph Fierro, Benafsh Sapra, Becky Tsai, Yan Meng, Doreen Ng, James Xie                                                                                                                                                                                                                                                                                                                                                                                                                                                                                        |
| EPI_ISL_1097641                                                                                                                                                                                                                                                                                                                                                                                                                                                                                                                                                                                                                                                                                                                          | Colorado Department of Public Health and Environment                                                         | Colorado Department of Public Health and Environment                                                                                                                                                                       | Laura Bankers, Molly C. Hetherington-Rauth, Diana Ir, Shannon Ely, Shannon R. Matzinger, Sarah Elizabeth Totten, Emily A. Travanty                                                                                                                                                                                                                                                                                                                                                                                                                                                              |
| EPI_ISL_1097777                                                                                                                                                                                                                                                                                                                                                                                                                                                                                                                                                                                                                                                                                                                          | New Mexico Department of Health Scientific Laboratory                                                        | New Mexico Department of Health Scientific Laboratory                                                                                                                                                                      | Ellie Johnson, Anastacia Griego-Fisher, Deldra Malone, Jennifer Benoit                                                                                                                                                                                                                                                                                                                                                                                                                                                                                                                          |
| EPI_ISL_1097788, EPI_ISL_1097860, EPI_ISL_1098334, EPI_ISL_1098393, EPI_ISL_1098430                                                                                                                                                                                                                                                                                                                                                                                                                                                                                                                                                                                                                                                      | Pandemic Response Lab - NYC                                                                                  | Pandemic Response Lab, R&D                                                                                                                                                                                                 | Henry Lee, Michael Hammerling, Melissa Hopkins, Cybill del Castillo, Shinyoung Clair Kang, William Ward, Pradeep Bugga, Haiping Hao, Jon Laurent                                                                                                                                                                                                                                                                                                                                                                                                                                                |
| EPI_ISL_1110069, EPI_ISL_1110111                                                                                                                                                                                                                                                                                                                                                                                                                                                                                                                                                                                                                                                                                                         | UW Virology Lab                                                                                              | UW Virology Lab                                                                                                                                                                                                            | Pavitra Roychoudhury, Hong Xie, Lasata Shrestha, Shah Mohamed Bakhsh, Michelle Lin, Noah Baker, Meei-Li Huang, Keith R Jerome, Alexander Greninger                                                                                                                                                                                                                                                                                                                                                                                                                                              |
| EPI_ISL_1110573                                                                                                                                                                                                                                                                                                                                                                                                                                                                                                                                                                                                                                                                                                                          | Kansas Health and Environmental Lab                                                                          | Kansas Health and Environmental Lab                                                                                                                                                                                        | Mike Grose, Carissa Robertson, Ben Olsen, and Phil Adam                                                                                                                                                                                                                                                                                                                                                                                                                                                                                                                                         |
| EPI_ISL_402119                                                                                                                                                                                                                                                                                                                                                                                                                                                                                                                                                                                                                                                                                                                           | National Institute for Viral Disease Control and Prevention, China CDC                                       | National Institute for Viral Disease Control and Prevention, China CDC                                                                                                                                                     | Wenjie TanXiang ZhaoWenling WangXuejun MaYongzhong JiangRoujian Lu, Ji Wang, Weimin ZhouPeihua NiuPeipei LiuFaxian ZhanWeifeng ShiBaoying HuangJun LiuLi ZhaoYao MengXiaozhou HeFei YeNa ZhuYang LiJing ChenWenbo XuGeorge F. GaoGuizhen Wu                                                                                                                                                                                                                                                                                                                                                     |
| EPI_ISL_402124, EPI_ISL_402129                                                                                                                                                                                                                                                                                                                                                                                                                                                                                                                                                                                                                                                                                                           | Wuhan Jinyintan Hospital                                                                                     | Wuhan Institute of Virology, Chinese Academy of Sciences                                                                                                                                                                   | Peng Zhou, Xing-Lou Yang, Ding-Yu Zhang, Lei Zhang, Yan Zhu, Hao-Rui Si, Zhengli Shi                                                                                                                                                                                                                                                                                                                                                                                                                                                                                                            |
| EPI_ISL_403929                                                                                                                                                                                                                                                                                                                                                                                                                                                                                                                                                                                                                                                                                                                           | Institute of Pathogen Biology, Chinese Academy of Medical Sciences & Peking Union Medical College            | Institute of Pathogen Biology, Chinese Academy of Medical Sciences & Peking Union Medical College                                                                                                                          | Lili Ren, Jianwei Wang, Qi Jin, Zichun Xiang, Zhiqiang Wu, Chao Wu, Yiwei Liu                                                                                                                                                                                                                                                                                                                                                                                                                                                                                                                   |
| EPI_ISL_404253                                                                                                                                                                                                                                                                                                                                                                                                                                                                                                                                                                                                                                                                                                                           | IL Department of Public Health Chicago Laboratory                                                            | Pathogen Discovery, Respiratory Viruses Branch, Division of Viral Diseases, Centers for Diseases Control and Prevention                                                                                                    | Ying Tao, Krista Queen, Clinton R. Paden, Jing Zhang, Yan Li, Anna Uehara, Xiaoyan Lu, Brian Lynch, Senthil Kumar K. Sakthivel, Brett L. Whitaker, Shifaq Kamili, Lijuan Wang, Janna' R. Murray, Susan I. Gerber, Stephen Lindstrom, Suxiang Tong                                                                                                                                                                                                                                                                                                                                               |
| EPI_ISL_406034, EPI_ISL_406036                                                                                                                                                                                                                                                                                                                                                                                                                                                                                                                                                                                                                                                                                                           | California Department of Public Health                                                                       | Pathogen Discovery, Respiratory Viruses Branch, Division of Viral Diseases, Centers for Diseases Control and Prevention                                                                                                    | Anna Uehara, Krista Queen, Ying Tao, Yan Li, Clinton R. Paden, Jing Zhang, Xiaoyan Lu, Brian Lynch, Senthil Kumar K. Sakthivel, Brett L. Whitaker, Shifaq Kamili, Lijuan Wang, Janna' R. Murray, Susan I. Gerber, Stephen Lindstrom, Suxiang Tong                                                                                                                                                                                                                                                                                                                                               |
| EPI_ISL_406223                                                                                                                                                                                                                                                                                                                                                                                                                                                                                                                                                                                                                                                                                                                           | Arizona Department of Health Services                                                                        | Pathogen Discovery, Respiratory Viruses Branch, Division of Viral Diseases, Centers for Disease Control and Prevention                                                                                                     | Ying Tao, Clinton R. Paden, Krista Queen, Anna Uehara, Yan Li, Jing Zhang, Xiaoyan Lu, Brian Lynch, Senthil Kumar K. Sakthivel, Brett L. Whitaker, Shifaq Kamili, Lijuan Wang, Janna' R. Murray, Susan I. Gerber, Stephen Lindstrom, Suxiang Tong                                                                                                                                                                                                                                                                                                                                               |
| EPI_ISL_406596                                                                                                                                                                                                                                                                                                                                                                                                                                                                                                                                                                                                                                                                                                                           | Department of Infectious and Tropical Diseases, Bichat Claude Bernard Hospital, Paris                        | National Reference Center for Viruses of Respiratory Infections, Institut Pasteur, Paris                                                                                                                                   | Mélanie Albert, Marion Barbet, Sylvie Behillili, Méline Bizard, Angela Brisebarre, Flora Donati, Vincent Enouf, Maud Vanpeene, Sylvie van der Werf, Yazdan Yazdanpanah, Xavier Lescure.                                                                                                                                                                                                                                                                                                                                                                                                         |
| EPI_ISL_406716                                                                                                                                                                                                                                                                                                                                                                                                                                                                                                                                                                                                                                                                                                                           | State Key Laboratory of Virology, Wuhan University                                                           | State Key Laboratory of Virology, Wuhan University                                                                                                                                                                         | Chen,L., Liu,W., Zhang,Q., Xu,K., Ye,G., Wu,W., Sun,Z., Liu,F., Wu,K., Mei,Y., Zhang,W., Chen,Y., Li,Y., Shi,M., Lan,K. and Liu,Y.                                                                                                                                                                                                                                                                                                                                                                                                                                                              |
| EPI_ISL_406798, EPI_ISL_406800                                                                                                                                                                                                                                                                                                                                                                                                                                                                                                                                                                                                                                                                                                           | General Hospital of Central Theater Command of People's Liberation Army of China                             | BGI & Institute of Microbiology, Chinese Academy of Sciences & Shandong First Medical University & Shandong Academy of Medical Sciences & General Hospital of Central Theater Command of People's Liberation Army of China | Weijun Chen, Yuhai Bi, Weifeng Shi and Zhenhong Hu                                                                                                                                                                                                                                                                                                                                                                                                                                                                                                                                              |
| EPI_ISL_406862                                                                                                                                                                                                                                                                                                                                                                                                                                                                                                                                                                                                                                                                                                                           | Charité Universitätsmedizin Berlin, Institute of Virology; Institut für Mikrobiologie der Bundeswehr, Munich | Charité Universitätsmedizin Berlin, Institute of Virology                                                                                                                                                                  | Victor M Corman, Julia Schneider, Talitha Veith, Barbara Mühlemann, Markus Antwerpen, Christian Drosten, Roman Wölfel                                                                                                                                                                                                                                                                                                                                                                                                                                                                           |
| EPI_ISL_407071                                                                                                                                                                                                                                                                                                                                                                                                                                                                                                                                                                                                                                                                                                                           | Respiratory Virus Unit, Microbiology Services Colindale, Public Health England                               | Respiratory Virus Unit, Microbiology Services Colindale, Public Health England                                                                                                                                             | Monica Galiano, Shahjahan Miah, Richard Myers, Angie Lackenby, Omolola Akinbami, Tiina Talts, Leena Bhaw, Kirstin Edwards, Jonathan Hubb, Joanna Ellis, Maria Zambon                                                                                                                                                                                                                                                                                                                                                                                                                            |
| EPI_ISL_407079                                                                                                                                                                                                                                                                                                                                                                                                                                                                                                                                                                                                                                                                                                                           | Lapland Central Hospital                                                                                     | Department of Virology, University of Helsinki and Helsinki University Hospital, Helsinki, Finland                                                                                                                         | Teemu Smura, Suvi Kuivanan, Hannimari Kallio-Kokko, Olli Vapalahti                                                                                                                                                                                                                                                                                                                                                                                                                                                                                                                              |
| EPI_ISL_407893                                                                                                                                                                                                                                                                                                                                                                                                                                                                                                                                                                                                                                                                                                                           | Centre for Infectious Diseases and Microbiology Laboratory Services                                          | NSW Health Pathology - Institute of Clinical Pathology and Medical Research; Westmead Hospital; University of Sydney                                                                                                       | Eden J-S, Carter I, Rahman H, Holmes EC, Rockett R, O'Sullivan MV, Sintchenko V, Chen SC, Maddocks S, Kok J and Dwyer DE for the 2019-nCoV Study Group                                                                                                                                                                                                                                                                                                                                                                                                                                          |

|                                                |                                                                                                                 |                                                                                                                                                                                                 |                                                                                                                                                                                                                                                                                                                                                                                                                                  |
|------------------------------------------------|-----------------------------------------------------------------------------------------------------------------|-------------------------------------------------------------------------------------------------------------------------------------------------------------------------------------------------|----------------------------------------------------------------------------------------------------------------------------------------------------------------------------------------------------------------------------------------------------------------------------------------------------------------------------------------------------------------------------------------------------------------------------------|
| EPI_ISL_408431                                 | Sorbonne Université, Inserm et Assistance Publique-Hôpitaux de Paris (Pitié Salpêtrière)                        | National Reference Center for Viruses of Respiratory Infections, Institut Pasteur, Paris                                                                                                        | Mélanie Albert, Marion Barbet, Sylvie Behillil, Méline Bizard, Angela Brisebarre, Flora Donati, Vincent Enouf, Maud Vanpeene, Sylvie van der Werf, Sonia Burrel, Anne-Geneviève Marcellin, Vincent Calvez, David Boutolleau, Elise Klément, Valérie Pourcher, Eric Caumes.                                                                                                                                                       |
| EPI_ISL_408977                                 | Serology, Virology and OTDS Laboratories (SAVID), NSW Health Pathology Randwick                                 | NSW Health Pathology - Institute of Clinical Pathology and Medical Research; Centre for Infectious Diseases and Microbiology Laboratory Services; Westmead Hospital; University of Sydney       | Eden J-S, Carter I, Rahman H, Rawlinson W, Holmes EC, Rockett R, O'Sullivan MV, Sintchenko V, Chen SC, Maddocks S, Kok J and Dwyer DE for the 2019-nCoV Study Group*                                                                                                                                                                                                                                                             |
| EPI_ISL_409067                                 | Massachusetts Department of Public Health                                                                       | Pathogen Discovery, Respiratory Viruses Branch, Division of Viral Diseases, Centers for Diseases Control and Prevention                                                                         | Clinton R. Paden, Jing Zhang, Krista Queen, Yan Li, Ying Tao, Anna Uehara, Xiaoyan Lu, Brian Lynch, Senthil Kumar K. Sakhthivel, Brett L. Whitaker, Shifaq Kamili, Lijuan Wang, Janna' R. Murray, Susan I. Gerber, Stephen Lindstrom, Suxiang Tong                                                                                                                                                                               |
| EPI_ISL_410044                                 | California Department of Public Health                                                                          | Pathogen Discovery, Respiratory Viruses Branch, Division of Viral Diseases, Centers for Diseases Control and Prevention                                                                         | Jing Zhang, Krista Queen, Yan Li, Ying Tao, Anna Uehara, Clinton R. Paden, Xiaoyan Lu, Brian Lynch, Senthil Kumar K. Sakhthivel, Brett L. Whitaker, Shifaq Kamili, Lijuan Wang, Janna' R. Murray, Susan I. Gerber, Stephen Lindstrom, Suxiang Tong                                                                                                                                                                               |
| EPI_ISL_410045                                 | IL Department of Public Health Chicago Laboratory                                                               | Pathogen Discovery, Respiratory Viruses Branch, Division of Viral Diseases, Centers for Diseases Control and Prevention                                                                         | Yan Li, Jing Zhang, Krista Queen, Ying Tao, Anna Uehara, Clinton R. Paden, Xiaoyan Lu, Brian Lynch, Senthil Kumar K. Sakhthivel, Brett L. Whitaker, Shifaq Kamili, Lijuan Wang, Janna' R. Murray, Susan I. Gerber, Stephen Lindstrom, Suxiang Tong                                                                                                                                                                               |
| EPI_ISL_410720                                 | Department of Infectious and Tropical Diseases, Bichat Claude Bernard Hospital, Paris                           | National Reference Center for Viruses of Respiratory Infections, Institut Pasteur, Paris                                                                                                        | Mélanie Albert, Marion Barbet, Sylvie Behillil, Méline Bizard, Angela Brisebarre, Flora Donati, Vincent Enouf, Maud Vanpeene, Sylvie van der Werf, Yazdan Yazdanpanah, Xavier Lescure.                                                                                                                                                                                                                                           |
| EPI_ISL_411219, EPI_ISL_411220                 | Department of Infectious and Tropical Diseases, Bichat Claude Bernard Hospital, Paris                           | Laboratoire Virpath, CIRI U111, UCBL1, INSERM, CNRS, ENS Lyon                                                                                                                                   | Olivier Terrier, Aurélien Traversier, Julien Fourret, Yazdan Yazdanpanah, Xavier Lescure, Alexandre Gaymard, Bruno Lina, Manuel Rosa-Calatrava                                                                                                                                                                                                                                                                                   |
| EPI_ISL_412973                                 | Department of Infectious Diseases, Istituto Superiore di Sanità, Roma , Italy                                   | Virology Laboratory, Scientific Department, Army Medical Center                                                                                                                                 | Paola Stefanelli, Stefano Fiore, Antonella Marchi, Eleonora Benedetti, Concetta Fabiani, Giovanni Faggioni, Antonella Fortunato, Riccardo De Santis, Silvia Fillo, Anna Anselmo, Andrea Ciammarrucconi, Stefano Palomba, Florio Lista                                                                                                                                                                                            |
| EPI_ISL_414019, EPI_ISL_414020                 | Laboratoire de Virologie, HUG                                                                                   | Swiss National Reference Centre for Influenza                                                                                                                                                   | LAUBSCHER Florian et al.                                                                                                                                                                                                                                                                                                                                                                                                         |
| EPI_ISL_414647                                 | Viral Respiratory Lab, National Institute for Biomedical Research (INRB)                                        | Pathogen Sequencing Lab, National Institute for Biomedical Research (INRB)                                                                                                                      | Placide Mbala-Kingebeni, Edith Nkwembe, Eddy Kinganda-Lusamaki, Amuri Aziza, Catherine Pratt, Matthias Pauthner, Josh Quick, Allison Black, James Hadfield, Trevor Bedford, Ian Goodfellow, Nick Loman, Kristian Andersen, Michael Wiley, Steve Ahuka-Mundeke, Jean-Jacques Muyembe Tamfum                                                                                                                                       |
| EPI_ISL_416410                                 | Victorian Infectious Diseases Reference Laboratory (VIDRL)                                                      | Victorian Infectious Diseases Reference Laboratory and Microbiological Diagnostic Unit Public Health Laboratory, Doherty Institute                                                              | Caly L., Seemann T., Schultz M., Druce J., Tairaoa, G.                                                                                                                                                                                                                                                                                                                                                                           |
| EPI_ISL_416484                                 | Servicio de Microbiología. Consorcio Hospital General Universitario de Valencia                                 | Sequencing and Bioinformatics Service and Molecular Epidemiology Research Group. FISABIO-Public Health                                                                                          | Maria Dolores Ocete, Concepcion Gimeno, Giuseppe D'Auria, Griselda De Marco, Neris Garcia-Gonzalez, Maria Alma Bracho, Fernando Gonzalez-Candelas                                                                                                                                                                                                                                                                                |
| EPI_ISL_417447                                 | Laboratory of Infectious Diseases, Department of Biomedical and Clinical Sciences L. Sacco, University of Milan | Laboratory of Infectious Diseases, Department of Biomedical and Clinical Sciences L. Sacco, University of Milan                                                                                 | Gianguglielmo Zehender, Alessia Lai, Annalisa Bergna, Luca Meroni, Agostino Riva, Claudia Balotta, Maciej Tarkowski, Arianna Gabrieli, Dario Bernacchia, Stefano Rusconi, Giuliano Rizzardini, Spinello Antinori, Massimo Galli                                                                                                                                                                                                  |
| EPI_ISL_418799                                 | Mater Pathology                                                                                                 | Public Health Virology Laboratory                                                                                                                                                               | Bixing Huang, Alyssa Pyke, Amanda De Jong, Andrew Van Den Hurk, Carmel Taylor, David Warrilow, Doris Genge, Elisabeth Gamez, Glen Hewitson, Ian Maxwell Mackay, Inga Sultana, Jamie McMahon, Jean Barcelon, Judy Northill, Mitchell Finger, Natalie Simpson, Neelima Nair, Peter Burtonclay, Peter Moore, Sarah Wheatley, Sean Moody, Sonja Hall-Mendelin, Timothy Gardam, and Frederick Moore                                   |
| EPI_ISL_419725                                 | Microbiological Diagnostic Unit Public Health Laboratory                                                        | Microbiological Diagnostic Unit Public Health Laboratory                                                                                                                                        | Seemann T., Schultz M., Sait, M., Sherry, N.                                                                                                                                                                                                                                                                                                                                                                                     |
| EPI_ISL_419809                                 | Victorian Infectious Diseases Reference Laboratory (VIDRL)                                                      | Victorian Infectious Diseases Reference Laboratory and Microbiological Diagnostic Unit Public Health Laboratory, Doherty Institute                                                              | Caly L., Seemann T., Sait, M., Schultz M., Druce J., Sherry, N.                                                                                                                                                                                                                                                                                                                                                                  |
| EPI_ISL_422394                                 | NMIMR, Department of Virology                                                                                   | WACCBP, University of Ghana                                                                                                                                                                     | Joyce M. Ngoi, Bright Adu, Collins M. Morang'a, Selassie Kumordjie, Miriam Eshun, Linda Boatemaa, Vanessa Magnussen, Erasmus Kotey, Fred Tei-Maya, Dominic S. Y. Amuzu, Peter Quashie, Augustina Arjarquah, Ivy Asante, Evelyn Bonney, George B. Kyei, Kofi Bonney, Abraham Kwabena Anang, Gordon A. Awandare, William Ampofo                                                                                                    |
| EPI_ISL_424909                                 | MA State Public Health Laboratory                                                                               | Pathogen Discovery, Respiratory Viruses Branch, Division of Viral Diseases, Centers for Disease Control and Prevention                                                                          | Ying Tao, Clinton R. Paden, Jing Zhang, Krista Queen, Anna Uehara, Yan Li, Haibin Wang, Mary S. Keckler, Alison S. Laufer Halpin, Christopher A. Elkins, Suxiang Tong                                                                                                                                                                                                                                                            |
| EPI_ISL_426025, EPI_ISL_426311, EPI_ISL_426321 | Wadsworth Center, New York State Department.of Health                                                           | Wadsworth Center, New York State Department.of Health                                                                                                                                           | Kirsten St. George, Daryl M. Lamson, Sara Griesemer, Jonathan Pitnick, Navjot Singh, Matthew D. Shudt, Erica Lasek-Nesselquist                                                                                                                                                                                                                                                                                                   |
| EPI_ISL_429126                                 | Unilabs Skovde                                                                                                  | The Public Health Agency of Sweden                                                                                                                                                              | Tobias Kollberg, Helena Enroth, Olov Svartstrom, Maria Lind Karlberg, Anna-Malin Linde, Oskar Karlsson Lindsjo, Anna Risberg, Shaman Muradrasoli, Karin Tegmark-Wisell                                                                                                                                                                                                                                                           |
| EPI_ISL_430808                                 | Departamento de Biología y genética molecular, IACA Laboratorios.                                               | Área de Secuenciación del Laboratorio de Virología del Hospital de Niños Dr. Ricardo Gutierrez on behalf of 'Proyecto Argentino Interinstitucional de genómica de SARS-CoV-2' (PAIS Consortium) | Nabaes Jodar, MS; Goya, S; Natale, MI; Lusso, S; Tittarelli, E; Suárez, A; Masciovecchio MV; Streitenberger ER; Mistchenko, AS; Valinotto, LE; Viegas, M.                                                                                                                                                                                                                                                                        |
| EPI_ISL_432237                                 | Wales Specialist Virology Centre                                                                                | Public Health Wales Microbiology Cardiff                                                                                                                                                        | Catherine Moore, Johnathan Evans, Malorie Perry, Simon Cottrell, Alec Birchley, Alexander Adams, Amy Gaskin, Bree Gatica-Wilcox, Jason Coombes, Lauren Gilbert, Lee Graham, Nicole Pacchiarini, Sara Kumziene-Summerhayes, Sarah Taylor, Sophie Jones, Sara Rey, Matthew Bull, Joanne Watkins, Sally Corden, Tom Connor                                                                                                          |
| EPI_ISL_435161                                 | Viral Respiratory Lab, National Institute for Biomedical Research (INRB)                                        | Pathogen Sequencing Lab, National Institute for Biomedical Research (INRB)                                                                                                                      | Placide Mbala-Kingebeni, Edith Nkwembe, Eddy Kinganda-Lusamaki, Amuri Aziza, Francisca Muyembe Mawete, Catherine Pratt, Matthias Pauthner, Josh Quick, Allison Black, James Hadfield, Trevor Bedford, Ian Goodfellow, Andrew Rambaut, Nick Loman, Kristian Andersen, Michael Wiley, Steve Ahuka-Mundeke, Jean-Jacques Muyembe Tamfum                                                                                             |
| EPI_ISL_450190                                 | Rady's Childrens Hospital                                                                                       | Andersen lab at Scripps Research                                                                                                                                                                | SEARCH Alliance San Diego                                                                                                                                                                                                                                                                                                                                                                                                        |
| EPI_ISL_450818                                 | Aneby VC                                                                                                        | The Public Health Agency of Sweden                                                                                                                                                              | Ken Granath, Anna-Malin Linde, Maria Lind Karlberg, Oskar Karlsson Lindsjo, Olov Svartstrom, Anna Risberg, Theresa Enkirch, Mia Brytting, Karin Tegmark-Wisell                                                                                                                                                                                                                                                                   |
| EPI_ISL_451113, EPI_ISL_451116                 | SA Pathology                                                                                                    | SA Pathology                                                                                                                                                                                    | Lex Leong, Chuan Kok Lim, Mark Turra, Ivan Bastian, Geoff Higgins                                                                                                                                                                                                                                                                                                                                                                |
| EPI_ISL_451347                                 | West China Hospital of Sichuan University                                                                       | State Key Laboratory of Biotherapy of Sichuan University                                                                                                                                        | Baowen Du, Minjin Wang, Chao Tang, Chuan Chen, Yongzhao Zhou, Mingxia Yu, Hancheng Wei, Weimin Li, Jing-wen Lin, Jia Geng, Binwu Ying, Lu Chen                                                                                                                                                                                                                                                                                   |
| EPI_ISL_454933, EPI_ISL_454980, EPI_ISL_454981 | Wuhan Chain Medical Labs (CMLabs)                                                                               | State Key Laboratory of Biotherapy of Sichuan University                                                                                                                                        | Baowen Du, Minjin Wang, Chao Tang, Chuan Chen, Yongzhao Zhou, Mingxia Yu, Hancheng Wei, Weimin Li, Jing-wen Lin, Jia Geng, Binwu Ying, Lu Chen                                                                                                                                                                                                                                                                                   |
| EPI_ISL_455845                                 | Skovde/Unilabs                                                                                                  | The Public Health Agency of Sweden                                                                                                                                                              | Anna-Malin Linde, Maria Lind Karlberg, Mattias Haukland, Reza Advani, Olov Svartstrom, Oskar Karlsson Lindsjo, Petra Edquist, Shaman Muradrasoli, Anna Risberg, Karin Tegmark-Wisell                                                                                                                                                                                                                                             |
| EPI_ISL_456146                                 | Instituto Nacional de Salud - Unidad de Secuenciación y Análisis Genómico                                       | Instituto Nacional de Salud, Universidad Cooperativa de Colombia, Instituto Alexander von Humboldt, Imperial College-London, London School of Hygiene & Tropical Medicine                       | Katherine Laiton-Donato, Diego A. Álvarez-Díaz, Carlos Franco-Muñoz, Jose A. Usme-Ciro, Gloria Puerto, Nicolas D. Franco-Sierra, Mailyn A. Gonzalez, Zulma M. Cucunubá, Christian Julian Villabona-Arenas, Liz Villabona-Arenas, Sussy Echeverría, Astrid C. Florez, Sergio Gomez-Rangel, Luz Dary Rodriguez, Juliana Barbosa, Erika Ospitia, Diana Marcela Walteros-Acero, Martha Lucia Ospina Martinez, Marcela Mercado-Reyes. |
| EPI_ISL_457996                                 | Oman-NIC                                                                                                        | Oman-NIC                                                                                                                                                                                        | Samira Al-Maruqi, Fahad Zadjali, Amina Al Jardani, Khulood Al-Mammary, Hanan Al-Kindi, Fatma BaAlawi, Hamida Al Barwani, Zeyana Al-Dahmani, Intisar Al-Shukri, Aisha Al-Busaidi, Aisha Al-Amri, Ahlam Al-Amri, Mohammed Al-Tobi, Samiha Al Kharusi, Abdulla Balkhair                                                                                                                                                             |
| EPI_ISL_458535                                 | Department of Pathology, University of Cambridge                                                                | Wellcome Sanger Institute for the COVID-19 Genomics UK (COG-UK) consortium                                                                                                                      | Luke W Meredith, M. Estée Török , Myra Hosmillo, William L. Hamilton, Martin D. Curran, Theresa Feltwell, Grant Hall, Anna Yakovleva, Fahad A Khokhar, Charlotte J. Houldcroft, Laura G Caller, Aminu S. Jahun, Sarah L. Caddy, Ian Goodfellow; and Alex Alderton, Roberto Amato, Sonia Goncalves, Ewan                                                                                                                          |

|                                                                                                                                                                                                                                                                |                                                                                           |                                                                                                                          |                                                                                                                                                                                                                                                                                                                                                                                                                                                                                                                                                                                                                                                                                             |
|----------------------------------------------------------------------------------------------------------------------------------------------------------------------------------------------------------------------------------------------------------------|-------------------------------------------------------------------------------------------|--------------------------------------------------------------------------------------------------------------------------|---------------------------------------------------------------------------------------------------------------------------------------------------------------------------------------------------------------------------------------------------------------------------------------------------------------------------------------------------------------------------------------------------------------------------------------------------------------------------------------------------------------------------------------------------------------------------------------------------------------------------------------------------------------------------------------------|
|                                                                                                                                                                                                                                                                |                                                                                           |                                                                                                                          | Harrison, David K. Jackson, Ian Johnston, Dominic Kwiatkowski, Cordelia Langford, John Sillitoe on behalf of the Wellcome Sanger Institute COVID-19 Surveillance Team ( <a href="http://www.sanger.ac.uk/covid-team">http://www.sanger.ac.uk/covid-team</a> )                                                                                                                                                                                                                                                                                                                                                                                                                               |
| EPI_ISL_459892                                                                                                                                                                                                                                                 | Kingston Health Sciences Center                                                           | Queen's Genomics Lab at Ongwanada (Q-GLO)                                                                                | Sjaarda CP, Rustom N, Huang D, Perez-Patrigeon S, Hudson ML, Wong H, Guan H, Ayub M, Soares CN, Colautti R, Evans GA, Sheth P                                                                                                                                                                                                                                                                                                                                                                                                                                                                                                                                                               |
| EPI_ISL_460065                                                                                                                                                                                                                                                 | Minnesota Department of Health, Public Health Laboratory                                  | Minnesota Department of Health, Public Health Laboratory                                                                 | Matt Plumb, Jacob Garfin, and Xiong Wang                                                                                                                                                                                                                                                                                                                                                                                                                                                                                                                                                                                                                                                    |
| EPI_ISL_460084                                                                                                                                                                                                                                                 | Molecular Virology Unit, Fondazione IRCCS Policlinico San Matteo , Pavia                  | Laboratory of Virology, INMI Lazzaro Spallanzani IRCCS                                                                   | Fausto Baldanti, Antonio Piralla, Martina Rueca, Barbara Bartolini, Maria R. Capobianchi, Cesare E.M. Gruber, Antonino Di Caro                                                                                                                                                                                                                                                                                                                                                                                                                                                                                                                                                              |
| EPI_ISL_463350                                                                                                                                                                                                                                                 | Washington State Department of Health                                                     | Seattle Flu Study                                                                                                        | Chu et al                                                                                                                                                                                                                                                                                                                                                                                                                                                                                                                                                                                                                                                                                   |
| EPI_ISL_464019                                                                                                                                                                                                                                                 | Unity Health Toronto                                                                      | Ontario Institute for Cancer Research                                                                                    | Ramzi Fattouh, Larissa M. Matukas, Mark Downing, Annette Gower, Karel Boissinot, Samira Mubareka, TIBDN, Ilina Lungu, Bernard Lam, Jeremy Johns, Paul Krzyzanowski, Richard de Borja, Philip Zuzarte, Jared Simpson                                                                                                                                                                                                                                                                                                                                                                                                                                                                         |
| EPI_ISL_466839                                                                                                                                                                                                                                                 | National Genomics Core-Center for DNA Fingerprinting and Diagnostics                      | National Genomics Core- Center for DNA Fingerprinting and Diagnostics (NGC-CDFD)- DBT's PAN-INDIA-1000 Genome consortium | Bala Pratyusha, Vinay Donipadi, G Shashikanth, Amrita Bhattacharjee, Rajeshree Sanyal, Raju Kumar, Ajay Kumar Chaudhary, Akash Chinchole, Brahmaji Sontyana, C. Arun Kumar, R HARINARAYANAN, RASHNA BHANDARI, MURALI DHARAN BASHYAM, DEBASHIS MITRA, DIVYA VASHISHT, ASHWIN DALAL                                                                                                                                                                                                                                                                                                                                                                                                           |
| EPI_ISL_466845                                                                                                                                                                                                                                                 | National Genomics Core-Center for DNA Fingerprinting and Diagnostics                      | National Genomics Core- Center for DNA Fingerprinting and Diagnostics (NGC-CDFD)- DBT's PAN-INDIA-1000 Genome consortium | Bala Pratyusha, Vinay Donipadi, G Shashikanth, Amrita Bhattacharjee, Chandra Shekhar V. Chilakala Gangi Reddy, Chinthakindi Krishna Prasad, Edurugatla Dinesh, Guru Raja, Hilal Ahmad Reshi, R HARINARAYANAN, RASHNA BHANDARI, MURALI DHARAN BASHYAM, DEBASHIS MITRA, DIVYA VASHISHT, ASHWIN DALAL                                                                                                                                                                                                                                                                                                                                                                                          |
| EPI_ISL_467101                                                                                                                                                                                                                                                 | Hospital Universitario Araba. Vitoria-Gasteiz                                             | SeqCOVID-SPAIN consortium/IBV(CSIC)                                                                                      | Silvia Hernández Crespo, Carmen Gómez González, Amaia Aguirre Quiñero, Marina Fernández Torres, M <sup>a</sup> Rosario Almela Ferrer, M <sup>a</sup> Concepción Lecaroz Agara, Andrés Canut Blasco. and SeqCOVID-SPAIN consortium                                                                                                                                                                                                                                                                                                                                                                                                                                                           |
| EPI_ISL_467443                                                                                                                                                                                                                                                 | NHLS-IALCH                                                                                | KRISP, KZN Research Innovation and Sequencing Platform                                                                   | Giandhari J, Pillay S, Lessells R, Chimukangara B, Mdlalose K, York D, Khan S, Tegally H, Wilkinson E, de Oliveira T                                                                                                                                                                                                                                                                                                                                                                                                                                                                                                                                                                        |
| EPI_ISL_467444                                                                                                                                                                                                                                                 | Molecular Diagnostics Services (MDS)                                                      | KRISP, KZN Research Innovation and Sequencing Platform                                                                   | Giandhari J, Pillay S, Lessells R, Chimukangara B, Mdlalose K, York D, Khan S, Tegally H, Wilkinson E, de Oliveira T                                                                                                                                                                                                                                                                                                                                                                                                                                                                                                                                                                        |
| EPI_ISL_467953                                                                                                                                                                                                                                                 | San Diego County Public Health Laboratory                                                 | Andersen lab at Scripps Research                                                                                         | SEARCH Alliance San Diego with Tracy Basler, Jovan Shephard, Brett Austin                                                                                                                                                                                                                                                                                                                                                                                                                                                                                                                                                                                                                   |
| EPI_ISL_467981                                                                                                                                                                                                                                                 | Rady's Childrens Hospital                                                                 | Andersen lab at Scripps Research                                                                                         | SEARCH Alliance San Diego                                                                                                                                                                                                                                                                                                                                                                                                                                                                                                                                                                                                                                                                   |
| EPI_ISL_468009, EPI_ISL_468019                                                                                                                                                                                                                                 | SA Pathology                                                                              | SA Pathology                                                                                                             | Lex Leong, Chuan Kok Lim, Mark Turra, Ivan Bastian, Geoff Higgins                                                                                                                                                                                                                                                                                                                                                                                                                                                                                                                                                                                                                           |
| EPI_ISL_468161                                                                                                                                                                                                                                                 | Department of Virology, Public Health Laboratories Division, National Institute of Health | Department of Virology, Public Health Laboratories Division, National Institute of Health                                | Massab Umair, Aamer Ikram, Muhammad Salman, Adnan Khurshid, Nazish Badar, Shannon Whitmer, John Klerna                                                                                                                                                                                                                                                                                                                                                                                                                                                                                                                                                                                      |
| EPI_ISL_468575                                                                                                                                                                                                                                                 | Quest Diagnostics                                                                         | Quest Diagnostics                                                                                                        | Anderson, B.P., Rosenthal, S.H., Gerasimova, A., Kagan, R.M. and Owen, R.                                                                                                                                                                                                                                                                                                                                                                                                                                                                                                                                                                                                                   |
| EPI_ISL_468979                                                                                                                                                                                                                                                 | Servicio de Microbiología, Hospital Universitario Son Espases                             | SeqCOVID-SPAIN consortium/IBV(CSIC)                                                                                      | Carla López-Causapé, Jordi Reina, Antonio Oliver and SeqCOVID-SPAIN consortium                                                                                                                                                                                                                                                                                                                                                                                                                                                                                                                                                                                                              |
| EPI_ISL_474970                                                                                                                                                                                                                                                 | Israel Central Virology laboratory                                                        | Israel Central Virology laboratory                                                                                       | Neta Zuckerman, Efrat Dahan Bucris, Oran Erster, Ella Mendelson, Michal Mandelboim                                                                                                                                                                                                                                                                                                                                                                                                                                                                                                                                                                                                          |
| EPI_ISL_475108                                                                                                                                                                                                                                                 | Skovde/Unilabs                                                                            | The Public Health Agency of Sweden                                                                                       | Oskar Karlsson Lindsjo, Maria Lind Karlberg, Mattias Haukland, Reza Advani, Olov Svartstrom, Anna-Malin Linde, Sandra Brodressedson, Petra Edquist, Shamam Muradrasoli, Anna Risberg, Karin Tegmark-Wisell                                                                                                                                                                                                                                                                                                                                                                                                                                                                                  |
| EPI_ISL_476139                                                                                                                                                                                                                                                 | Folkhalsomyndigheten                                                                      | The Public Health Agency of Sweden                                                                                       | Oskar Karlsson Lindsjo, Maria Lind Karlberg, Mattias Haukland, Reza Advani, Olov Svartstrom, Anna-Malin Linde, Sandra Brodressedson, Petra Edquist, Shamam Muradrasoli, Anna Risberg, Karin Tegmark-Wisell                                                                                                                                                                                                                                                                                                                                                                                                                                                                                  |
| EPI_ISL_476874                                                                                                                                                                                                                                                 | Department of MicroBiology, Government Medical College, Surat                             | Gujarat Biotechnology Research Centre                                                                                    | Janvi Raval, Zarna Patel, Monika Gandhi, Pinal Trivedi, Maharshi Pandya, Nidhi Patel, Nitin Savaliya, Raghawendra Kumar, Dinesh Kumar, Zuber Saiyed, Komal Patel, Labdhi Pandya, Afzal Ansari, Nikha Trivedi, Naresh Chauhan, Summaiya Mullan, Amit gamit, Apurvasinh Puvar, R D Dixit, A M Kadri, Harsh Bakshi, Chaitanya Joshi, Madhvi Joshi                                                                                                                                                                                                                                                                                                                                              |
| EPI_ISL_476875                                                                                                                                                                                                                                                 | Department of MicroBiology, Government Medical College, Surat                             | Gujarat Biotechnology Research Centre                                                                                    | Zarna Patel, Monika Gandhi, Pinal Trivedi, Maharshi Pandya, Nidhi Patel, Nitin Savaliya, Raghawendra Kumar, Dinesh Kumar, Zuber Saiyed, Komal Patel, Labdhi Pandya, Afzal Ansari, Nikha Trivedi, Naresh Chauhan, Summaiya Mullan, Amit gamit, Apurvasinh Puvar, Janvi Raval, R D Dixit, A M Kadri, Harsh Bakshi, Chaitanya Joshi, Madhvi Joshi                                                                                                                                                                                                                                                                                                                                              |
| EPI_ISL_476881                                                                                                                                                                                                                                                 | Department of MicroBiology, Government Medical College, Surat                             | Gujarat Biotechnology Research Centre                                                                                    | Dinesh Kumar, Zuber Saiyed, Komal Patel, Labdhi Pandya, Afzal Ansari, Nikha Trivedi, Naresh Chauhan, Summaiya Mullan, Amit gamit, Apurvasinh Puvar, Janvi Raval, Zarna Patel, Monika Gandhi, Pinal Trivedi, Maharshi Pandya, Nidhi Patel, Nitin Savaliya, Raghawendra Kumar, R D Dixit, A M Kadri, Harsh Bakshi, Chaitanya Joshi, Madhvi Joshi                                                                                                                                                                                                                                                                                                                                              |
| EPI_ISL_479883                                                                                                                                                                                                                                                 | Sapporo City Institute of Public Health                                                   | Pathogen Genomics Center, National Institute of Infectious Diseases                                                      | Tsuyoshi Sekizuka, Asami Ohnishi, Kentaro Itokawa, Rina Tanaka, Masanori Hashino, Hajime Kamiya, Motoi Suzuki, Makoto Kuroda                                                                                                                                                                                                                                                                                                                                                                                                                                                                                                                                                                |
| EPI_ISL_483222, EPI_ISL_483228, EPI_ISL_483231, EPI_ISL_483252, EPI_ISL_483276, EPI_ISL_483277, EPI_ISL_483285, EPI_ISL_483287, EPI_ISL_483337, EPI_ISL_483346, EPI_ISL_483347, EPI_ISL_483352, EPI_ISL_483415, EPI_ISL_483467, EPI_ISL_483474, EPI_ISL_483527 | see above                                                                                 | UC San Diego Center for Advanced Laboratory Medicine                                                                     | SEARCH Alliance San Diego with David Pride, Ji H Shin                                                                                                                                                                                                                                                                                                                                                                                                                                                                                                                                                                                                                                       |
| EPI_ISL_483709                                                                                                                                                                                                                                                 | Israel Central Virology laboratory                                                        | Israel Central Virology laboratory                                                                                       | Neta Zuckerman, Efrat Dahan Bucris, Oran Erster, Ella Mendelson, Michal Mandelboim                                                                                                                                                                                                                                                                                                                                                                                                                                                                                                                                                                                                          |
| EPI_ISL_488074                                                                                                                                                                                                                                                 | NU-OMICS DNA Sequencing research facility, Northumbria University                         | Wellcome Sanger Institute for the COVID-19 Genomics UK (COG-UK) consortium                                               | Chris Duncan, Sheia Waugh, Shirelle Burton-Fanning, Gary Eltringham, Jennifer Collins, Brendan Payne, Yusri Taha, Emma Swindells, Jane Greenaway, Edward Barton, Garren Scott, Debra Padgett, Clive Graham, Sarah Essex, Steve Liggett, Paul Baker, Lynn Dover, Wen Yew, Gary Black, John Allan, Joshua Loh, Greg Young, Matthew Bashton, Andrew Nelson, Darren Smith and Alex Alderton, Roberto Amato, Sonia Goncalves, Ewan Harrison, David K. Jackson, Ian Johnston, Dominic Kwiatkowski, Cordelia Langford, John Sillitoe on behalf of the Wellcome Sanger Institute COVID-19 Surveillance Team ( <a href="http://www.sanger.ac.uk/covid-team">http://www.sanger.ac.uk/covid-team</a> ) |
| EPI_ISL_490025                                                                                                                                                                                                                                                 | South Eastern Area Laboratory Services (SEALS)                                            | NSW Health Pathology - Institute of Clinical Pathology and Medical Research; Westmead Hospital; University of Sydney     | CIDM-PH et al.                                                                                                                                                                                                                                                                                                                                                                                                                                                                                                                                                                                                                                                                              |
| EPI_ISL_494388, EPI_ISL_494423, EPI_ISL_494446, EPI_ISL_494470, EPI_ISL_494472, EPI_ISL_494482, EPI_ISL_494491                                                                                                                                                 | San Diego County Public Health Laboratory                                                 | Andersen lab at Scripps Research                                                                                         | SEARCH Alliance San Diego with Tracy Basler, Jovan Shephard, Brett Austin                                                                                                                                                                                                                                                                                                                                                                                                                                                                                                                                                                                                                   |
| EPI_ISL_494509                                                                                                                                                                                                                                                 | Quest Diagnostics                                                                         | Quest Diagnostics                                                                                                        | Anderson, B.P., Rosenthal, S.H., Gerasimova, A., Kagan, R.M. and Owen, R.                                                                                                                                                                                                                                                                                                                                                                                                                                                                                                                                                                                                                   |
| EPI_ISL_494595, EPI_ISL_494625                                                                                                                                                                                                                                 | San Diego County Public Health Laboratory                                                 | Andersen lab at Scripps Research                                                                                         | SEARCH Alliance San Diego with Tracy Basler, Jovan Shephard, Brett Austin                                                                                                                                                                                                                                                                                                                                                                                                                                                                                                                                                                                                                   |
| EPI_ISL_494635, EPI_ISL_494673, EPI_ISL_494686                                                                                                                                                                                                                 | Scripps Medical Laboratory                                                                | Andersen lab at Scripps Research                                                                                         | SEARCH Alliance San Diego with Michael Quigley, Elen Stefanski, Ian Mchardy                                                                                                                                                                                                                                                                                                                                                                                                                                                                                                                                                                                                                 |
| EPI_ISL_494714, EPI_ISL_494745, EPI_ISL_494746                                                                                                                                                                                                                 | San Diego County Public Health Laboratory                                                 | Andersen lab at Scripps Research                                                                                         | SEARCH Alliance San Diego with Tracy Basler, Jovan Shephard, Brett Austin                                                                                                                                                                                                                                                                                                                                                                                                                                                                                                                                                                                                                   |
| EPI_ISL_495286                                                                                                                                                                                                                                                 | Osmania Medical College                                                                   | CSIR-Centre for Cellular and Molecular Biology                                                                           | Shashikala Reddy, Mahboob Khan, Sofia Banu, Payel Mukherjee, Priya Singh, Onkar Kulkarni, Dhiviya Vedagiri, Divya Gupta, Vishal Sah, Santosh Kumar Kuncha, Krishnan Harinivas Harshan, Archana Bharadwaj Siva, Karthik Bharadwaj Tallapakka, Shaguftha Khan, Lamuk Zaveri, Namami Gaur, Sakshi Shambhavi, Nikhil Hajirnis, M Soujanya Reddy, Pratheusa Maccha, Tulasi Nagabandi, Purushotham Vodnala, Rakesh K Mishra, Divya Tej Sowpati                                                                                                                                                                                                                                                    |
| EPI_ISL_496942                                                                                                                                                                                                                                                 | Washington State Department of Health                                                     | Seattle Flu Study                                                                                                        | Deborah A. Nickerson, Chris D. Frazier, Jover Lee, Benjamin Pelle, Matthew Richardson, Amanda Adler, Elisabeth Brandstetter, Peter D. Han, Kairsten Fay, Misja Ilcisin, Kirsten Lacombe, Thomas R. Sibley, Melissa Truong, Caitlin R. Wolf, Romesh Gautom, Geoff Melly, Brian Hiatt, Philip Dykema, Scott Lindquist, Michael Boeckh, Janet A. Englund, Michael Famulare, Barry R. Lutz, Mark J. Rieder, Lea M. Starita, Matthew Thompson, Helen Y. Chu, Jay Shendure, Trevor Bedford                                                                                                                                                                                                        |
| EPI_ISL_500370                                                                                                                                                                                                                                                 | Centro de Investigación Biomédica de La Rioja - Hospital San                              | SeqCOVID-SPAIN consortium/IBV(CSIC)                                                                                      | María de Toro, José Manuel Azcona Gutiérrez, María Pilar Bea Escudero, Miriam Blasco Alberdi and SeqCOVID-SPAIN consortium                                                                                                                                                                                                                                                                                                                                                                                                                                                                                                                                                                  |

|                                                                                                                                |                                                                                                     |                                                                                                                        |                                                                                                                                                                                                                                                                                                                                                                                                                                                           |
|--------------------------------------------------------------------------------------------------------------------------------|-----------------------------------------------------------------------------------------------------|------------------------------------------------------------------------------------------------------------------------|-----------------------------------------------------------------------------------------------------------------------------------------------------------------------------------------------------------------------------------------------------------------------------------------------------------------------------------------------------------------------------------------------------------------------------------------------------------|
| EPI_ISL_509162, EPI_ISL_509164, EPI_ISL_509181                                                                                 | Pedro Logroño<br>OHSU Lab Services Molecular Microbiology Lab                                       | Oregon SARS-CoV-2 Genome Sequencing Center                                                                             | Brendan L. O'Connell, Ruth V. Nichols, Sally B. Grindstaff, Alec J. Hirsch, Guang Fan, Daniel N. Streblov, William B. Messer, Andrew C. Adey, Benjamin N. Bimber, Brian J. O'Roak                                                                                                                                                                                                                                                                         |
| EPI_ISL_509430                                                                                                                 | Centro de Desenvolvimento Tecnologico em Saude, Fundacao Oswaldo Cruz                               | Centro de Desenvolvimento Tecnologico em Saude, Fundacao Oswaldo Cruz                                                  | Souza,T.M., Fintelman-Rodrigues,N., De Paula,A.D., Saraiva,F.B., Ferreira,M.A., Sacramento,C.Q., Medeiros,M.A.                                                                                                                                                                                                                                                                                                                                            |
| EPI_ISL_509505                                                                                                                 | Area of Virology, Serology and Virology Division (SAVID), New South Wales Health Pathology Randwick | Area of Virology, Serology and Virology Division (SAVID), New South Wales Health Pathology Randwick                    | Rawlinson, W.                                                                                                                                                                                                                                                                                                                                                                                                                                             |
| EPI_ISL_512142                                                                                                                 | Alaska State Virology Laboratory                                                                    | Alaska State Virology Laboratory                                                                                       | Chen J et al with Pathogenomics group Dagdag R, Redlinger M, Milton E, George W, Kovalenko A, Drown DM, Bortz E                                                                                                                                                                                                                                                                                                                                           |
| EPI_ISL_512167, EPI_ISL_512172, EPI_ISL_512174, EPI_ISL_512183, EPI_ISL_512192, EPI_ISL_512198                                 | San Diego County Public Health Laboratory                                                           | Andersen lab at Scripps Research                                                                                       | SEARCH Alliance San Diego with Tracy Basler, Jovan Shephard, Brett Austin                                                                                                                                                                                                                                                                                                                                                                                 |
| EPI_ISL_512921                                                                                                                 | Pathogen Genomics Lab King Abdullah University of Science and Technology(KAUST)                     | Pathogen Genomics Lab King Abdullah University of Science and Technology(KAUST)                                        | Fadwa Alofi, Sharif Hala, Rahul P Salunke, Sara Mfarrej, Amit Kumar Subudhi, Fathia Ben Rached, Amanda, Luke, Afrah Alsomali, Asim Khogeer, Jumana Taha, Abdulaziz Alahmadi, Kahled Alghithami, Raaeece Naeem, Anwar Hashem, Naif Almontashiri, Arnab Pain                                                                                                                                                                                                |
| EPI_ISL_513126                                                                                                                 | Pathogen Genomics Lab King Abdullah University of Science and Technology(KAUST)                     | Pathogen Genomics Lab King Abdullah University of Science and Technology(KAUST)                                        | Sharif Hala, Fadwa Alofi, Sara Mfarrej, Amit Kumar Subudhi, Rahul P Salunke, Fathia Ben Rached, Amanda Ooi, Luke Esau, Afrah Alsomali, Asim Khogeer, Jumana Taha, Abdulaziz Alahmadi, Kahled Alghithami, Raaeece Naeem, Anwar Hashem, Naif Almontashiri, Arnab Pain                                                                                                                                                                                       |
| EPI_ISL_513885                                                                                                                 | UCSF Clinical Microbiology Laboratory                                                               | Chan-Zuckerberg Biohub                                                                                                 | CZB Ciliahub Consortium                                                                                                                                                                                                                                                                                                                                                                                                                                   |
| EPI_ISL_515919                                                                                                                 | California Department of Public Health                                                              | California Department of Public Health                                                                                 | CDPH IDLB COVIDNet                                                                                                                                                                                                                                                                                                                                                                                                                                        |
| EPI_ISL_516623                                                                                                                 | Instituto de Diagnostico y Referencia Epidemiologicos (INDRE)                                       | Instituto de Diagnostico y Referencia Epidemiologicos (INDRE)                                                          | Gisela Barrera-Badillo , Abril Rodriguez-Maldonado, Claudia Wong-Arambula , Natividad Cruz-Ortiz, Tatiana Nunez-Garcia, Dayanira Arellano-Suarez, Adnan Araiza-Rodriguez, Edgar Mendieta-Condado, Lucia Hernandez-Rivas, Irma Lopez-Martinez, Ernesto Ramirez-Gonzalez.                                                                                                                                                                                   |
| EPI_ISL_516731                                                                                                                 | UCSF Clinical Microbiology Laboratory                                                               | Chan-Zuckerberg Biohub                                                                                                 | CZB Ciliahub Consortium                                                                                                                                                                                                                                                                                                                                                                                                                                   |
| EPI_ISL_522875                                                                                                                 | Instituto Nacional de Medicina Genomica                                                             | Instituto Nacional de Medicina Genomica                                                                                | Hidalgo-Miranda A, Mendoza-Vargas A, Reyes-Grajeda JP, Cisneros-Villanueva M, Cedro-Tanda A, Hurtado-Cordova E, Peñaloza-Figueroa F, Herrera-Montalvo LA                                                                                                                                                                                                                                                                                                  |
| EPI_ISL_522986, EPI_ISL_523500                                                                                                 | Instituto Nacional de Medicina Genómica                                                             | Instituto Nacional de Medicina Genómica                                                                                | Hidalgo-Miranda A, Mendoza-Vargas A, Reyes-Grajeda JP, Cisneros-Villanueva M, Cedro-Tanda A, Hurtado-Cordova E, Peñaloza-Figueroa F, Herrera-Montalvo LA                                                                                                                                                                                                                                                                                                  |
| EPI_ISL_525434                                                                                                                 | Institute of Microbiology, Universidad San Francisco de Quito                                       | Institute of Microbiology, Universidad San Francisco de Quito                                                          | Juan José Guadalupe, Monica Becerra-Wong, Belén Prado-Vivar, Sully Márquez, Bernardo Gutiérrez, Eulalia Pazmiño, Carolina Pacheco, Damaris Zandoya, Carlos Mena, Nabih Dahik, Verónica Barragán, Patricio Rojas-Silva, Gabriel Trueba, Michelle Grunauer, Paúl Cárdenas                                                                                                                                                                                   |
| EPI_ISL_525578, EPI_ISL_525591, EPI_ISL_525618, EPI_ISL_525657, EPI_ISL_525666, EPI_ISL_525668, EPI_ISL_525670, EPI_ISL_525673 | Wadsworth Center, New York State Department of Health                                               | Wadsworth Center, New York State Department of Health                                                                  | Kirsten St. George, Daryl M. Lamson, Sara Griesemer, Jonathan Plitnick, Navjot Singh, Matthew D. Shudt, Erica Lasek-Nesselquist                                                                                                                                                                                                                                                                                                                           |
| EPI_ISL_525877                                                                                                                 | OHSU Lab Services Molecular Microbiology Lab                                                        | Ginkgo Bioworks Clinical Laboratory                                                                                    | Brendan L. O'Connell, Ruth V. Nichols, Alec J. Hirsch, Guang Fan, Daniel N. Streblov, Malaika Mckenzie-Bennett, James McGann, Jim Griffin, Keith Robison, Alex Plocik, Becky Schilling, Rebecca Littlefield, Michelle Spencer, Birgitte Simen, William B. Messer, Andrew C. Adey, Benjamin N. Bimber, Brian J. O'Roak                                                                                                                                     |
| EPI_ISL_525951, EPI_ISL_525952, EPI_ISL_526007, EPI_ISL_526029, EPI_ISL_526057, EPI_ISL_526060, EPI_ISL_526083, EPI_ISL_526112 | OHSU Lab Services Molecular Microbiology Lab                                                        | Oregon SARS-CoV-2 Genome Sequencing Center                                                                             | Brendan L. O'Connell, Ruth V. Nichols, Alec J. Hirsch, Guang Fan, Daniel N. Streblov, William B. Messer, Andrew C. Adey, Benjamin N. Bimber, Brian J. O'Roak                                                                                                                                                                                                                                                                                              |
| EPI_ISL_527014, EPI_ISL_527031                                                                                                 | Area of Virology, Serology and Virology Division (SAVID), New South Wales Health Pathology Randwick | Area of Virology, Serology and Virology Division (SAVID), New South Wales Health Pathology Randwick                    | Rawlinson, W.                                                                                                                                                                                                                                                                                                                                                                                                                                             |
| EPI_ISL_527762                                                                                                                 | Connecticut State Department of Public Health                                                       | Grubaugh Lab - Yale School of Public Health                                                                            | Joseph Fauver, Mary Petrone, Chantal Vogels, Anderson Brito, Tara Alpert, Anthony Muyombwe, Jafar Razeqi, Albert Ko, Nathan Grubaugh                                                                                                                                                                                                                                                                                                                      |
| EPI_ISL_527811                                                                                                                 | Institute of Microbiology, Universidad San Francisco de Quito                                       | Institute of Microbiology, Universidad San Francisco de Quito                                                          | Belén Prado-Vivar, Sully Márquez, Juan José Guadalupe, Monica Becerra-Wong, Bernardo Gutiérrez, Stephanie Arregui, Rene Bracho, Karina Barragan, Anita Garcia, Carlos Tobar, Verónica Barragán, Patricio Rojas-Silva, Gabriel Trueba, Michelle Grunauer, Paúl Cárdenas                                                                                                                                                                                    |
| EPI_ISL_529865                                                                                                                 | Michigan Department of Health and Human Services, Bureau of Laboratories                            | Michigan Department of Health and Human Services, Bureau of Laboratories                                               | Blankenship HM, Riner D, Soehnlén MK                                                                                                                                                                                                                                                                                                                                                                                                                      |
| EPI_ISL_530129                                                                                                                 | Seattle Flu Study                                                                                   | Seattle Flu Study                                                                                                      | Deborah A. Nickerson, Chris D. Frazier, Jover Lee, Benjamin Pelle, Matthew Richardson, Amanda Adler, Elisabeth Brandstetter, Peter D. Han, Kairsten Fay, Misja Ilcisin, Kirsten Lacombe, Thomas R. Sibley, Melissa Truong, Caitlin R. Wolf, Karen Cowgill, Stephanie Schrag, Jeff Duchin, Michael Boeckh, Janet A. Englund, Michael Famulare, Barry R. Lutz, Mark J. Rieder, Lea M. Starita, Matthew Thompson, Helen Y. Chu, Trevor Bedford, Jay Shendure |
| EPI_ISL_532638                                                                                                                 | Lighthouse Lab in Glasgow                                                                           | Wellcome Sanger Institute for the COVID-19 Genomics UK (COG-UK) consortium                                             | Harper VanSteenhouse, Yumi Kasai, David Gray, Carol Clugston, Anna Dominiczak and Alex Alderton, Roberto Amato, Sonia Goncalves, Ewan Harrison, David K. Jackson, Ian Johnston, Dominic Kwiatkowski, Cordelia Langford, John Sillitoe                                                                                                                                                                                                                     |
| EPI_ISL_535364                                                                                                                 | Oklahoma Animal Disease Diagnostic Laboratory                                                       | Oklahoma Animal Disease Diagnostic Laboratory                                                                          | Sai Narayanan, John C Ritchey, Girish Patil, Teluguakula Narasaraju, Sunil More, Jerry Malayer, Jeremiah Saliki, Anil Kaul, Akhilesh Ramachandran                                                                                                                                                                                                                                                                                                         |
| EPI_ISL_535696, EPI_ISL_535698, EPI_ISL_535699, EPI_ISL_535707                                                                 | CDPH, Microbial Diseases Laboratory                                                                 | Pathogen Discovery, Respiratory Viruses Branch, Division of Viral Diseases, Centers for Disease Control and Prevention | Yan Li, Jing Zhang, Ying Tao, Krista Queen, Brian Lynch, Anna Uehara, Clinton R. Paden, Rachel Marine, Haibin Wang, Suxiang Tong                                                                                                                                                                                                                                                                                                                          |
| EPI_ISL_536477, EPI_ISL_536502                                                                                                 | Instituto Nacional de Salud                                                                         | Laboratorio de Infecciones Respiratorias Agudas                                                                        | Eduardo Juscamayta Lopez, David Tarazona, Faviola Valdivia Guerrero, Nancy Rojas Serrano, Dennis Carhuarica, Lenin Maturrano Hernandez, Ronnie Gavilan Chavez                                                                                                                                                                                                                                                                                             |
| EPI_ISL_538342, EPI_ISL_538381                                                                                                 | Kingston Health Sciences Centre / Queen's University                                                | Ontario Institute for Cancer Research                                                                                  | Prameet M. Sheth, Calvin Sjaarda, Robert Colautti, Katya Douchant, Ilina Lungu, Bernard Lam, Paul Krzyzanowski, Michael Laszloffy, Lawrence E Heisler, Richard de Borja, Jared T. Simpson                                                                                                                                                                                                                                                                 |
| EPI_ISL_539785                                                                                                                 | Institute of Microbiology, Universidad San Francisco de Quito                                       | Institute of Microbiology, Universidad San Francisco de Quito                                                          | Andrea Macias, Belén Prado-Vivar, Sully Márquez, Juan José Guadalupe, Monica Becerra-Wong, Bernardo Gutiérrez, Verónica Barragán, Patricio Rojas-Silva, Gabriel Trueba, Michelle Grunauer, Paúl Cárdenas                                                                                                                                                                                                                                                  |
| EPI_ISL_539789                                                                                                                 | Institute of Microbiology, Universidad San Francisco de Quito                                       | Institute of Microbiology, Universidad San Francisco de Quito                                                          | Belén Prado-Vivar, Sully Márquez, Juan José Guadalupe, Monica Becerra-Wong, Bernardo Gutiérrez, Ligia Briceño, Nabih Dahik, Verónica Barragán, Patricio Rojas-Silva, Gabriel Trueba, Michelle Grunauer, Paúl Cárdenas                                                                                                                                                                                                                                     |
| EPI_ISL_541973                                                                                                                 | Texas Department of State Health Services                                                           | Texas Department of State Health Services                                                                              | Rashmi Tuladhar, Bonnie Oh, Jenny Zhang, Maliha Rahman, Anita Pokharel, Myong Koag, Chun Wang, Rachel Lee, Grace Kubin                                                                                                                                                                                                                                                                                                                                    |
| EPI_ISL_542069, EPI_ISL_542095                                                                                                 | New Mexico Department of Health Scientific Laboratory                                               | New Mexico Department of Health Scientific Laboratory                                                                  | Ellie Johnson, Anastacia Griego-Fisher, D'Eldra Malone                                                                                                                                                                                                                                                                                                                                                                                                    |
| EPI_ISL_542470                                                                                                                 | Texas Department of State Health Services                                                           | Texas Department of State Health Services                                                                              | Rashmi Tuladhar, Bonnie Oh, Jenny Zhang, Maliha Rahman, Anita Pokharel, Myong Koag, Chun Wang, Rachel Lee, Grace Kubin                                                                                                                                                                                                                                                                                                                                    |
| EPI_ISL_547740                                                                                                                 | Gundersen Molecular Diagnostics Laboratory                                                          | Kabara Cancer Research Institute                                                                                       | Craig S. Richmond, Paraic A. Kenny                                                                                                                                                                                                                                                                                                                                                                                                                        |
| EPI_ISL_548333                                                                                                                 | County of Santa Clara Public Health Department                                                      | Chan-Zuckerberg Biohub                                                                                                 | CZB Ciliahub Consortium                                                                                                                                                                                                                                                                                                                                                                                                                                   |
| EPI_ISL_548363                                                                                                                 | Tuolumne County Public Health                                                                       | Chan-Zuckerberg Biohub                                                                                                 | CZB Ciliahub Consortium                                                                                                                                                                                                                                                                                                                                                                                                                                   |
| EPI_ISL_548396, EPI_ISL_548497, EPI_ISL_548650                                                                                 | County of Santa Clara Public Health Department                                                      | Chan-Zuckerberg Biohub                                                                                                 | CZB Ciliahub Consortium                                                                                                                                                                                                                                                                                                                                                                                                                                   |
| EPI_ISL_551770, EPI_ISL_552586                                                                                                 | Lighthouse Lab in Milton Keynes                                                                     | Wellcome Sanger Institute for the COVID-19 Genomics UK                                                                 | The Lighthouse Lab in Milton Keynes and Alex Alderton, Roberto Amato, Sonia Goncalves, Ewan Harrison, David K. Jackson, Ian Johnston, Dominic                                                                                                                                                                                                                                                                                                             |



|                                                                                                                                                |                                                                                              |                                                                                                                      |                                                                                                                                                                                                                                                                                                                                                                                                                                                                                                                                                                                                         |
|------------------------------------------------------------------------------------------------------------------------------------------------|----------------------------------------------------------------------------------------------|----------------------------------------------------------------------------------------------------------------------|---------------------------------------------------------------------------------------------------------------------------------------------------------------------------------------------------------------------------------------------------------------------------------------------------------------------------------------------------------------------------------------------------------------------------------------------------------------------------------------------------------------------------------------------------------------------------------------------------------|
|                                                                                                                                                |                                                                                              | (COG-UK) consortium                                                                                                  | Kwiatkowski, Cordelia Langford, John Sillitoe on behalf of the Wellcome Sanger Institute COVID-19 Surveillance Team ( <a href="http://www.sanger.ac.uk/covid-team">http://www.sanger.ac.uk/covid-team</a> )                                                                                                                                                                                                                                                                                                                                                                                             |
| EPI_ISL_555449                                                                                                                                 | Lighthouse Lab in Alderley Park                                                              | Wellcome Sanger Institute for the COVID-19 Genomics UK (COG-UK) consortium                                           | The Lighthouse Lab in Alderley Park and Alex Alderton, Roberto Amato, Sonia Goncalves, Ewan Harrison, David K. Jackson, Ian Johnston, Dominic Kwiatkowski, Cordelia Langford, John Sillitoe on behalf of the Wellcome Sanger Institute COVID-19 Surveillance Team                                                                                                                                                                                                                                                                                                                                       |
| EPI_ISL_555553                                                                                                                                 | Lighthouse Lab in Alderley Park                                                              | Wellcome Sanger Institute for the COVID-19 Genomics UK (COG-UK) consortium                                           | The Lighthouse Lab in Alderley Park and Alex Alderton, Roberto Amato, Sonia Goncalves, Ewan Harrison, David K. Jackson, Ian Johnston, Dominic Kwiatkowski, Cordelia Langford, John Sillitoe on behalf of the Wellcome Sanger Institute COVID-19 Surveillance Team ( <a href="http://www.sanger.ac.uk/covid-team">http://www.sanger.ac.uk/covid-team</a> )                                                                                                                                                                                                                                               |
| EPI_ISL_558917                                                                                                                                 | Lighthouse Lab in Alderley Park                                                              | Wellcome Sanger Institute for the COVID-19 Genomics UK (COG-UK) consortium                                           | The Lighthouse Lab in Alderley Park and Alex Alderton, Roberto Amato, Sonia Goncalves, Ewan Harrison, David K. Jackson, Ian Johnston, Dominic Kwiatkowski, Cordelia Langford, John Sillitoe on behalf of the Wellcome Sanger Institute COVID-19 Surveillance Team                                                                                                                                                                                                                                                                                                                                       |
| EPI_ISL_569626, EPI_ISL_569643                                                                                                                 | New Mexico Department of Health Scientific Laboratory                                        | New Mexico Department of Health Scientific Laboratory                                                                | Ellie Johnson, Anastacia Griego-Fisher, D'Eldra Malone                                                                                                                                                                                                                                                                                                                                                                                                                                                                                                                                                  |
| EPI_ISL_569706, EPI_ISL_569708, EPI_ISL_569712, EPI_ISL_569727                                                                                 | Texas Department of State Health Services                                                    | Texas Department of State Health Services                                                                            | Rashmi Tuladhar, Bonnie Oh, Jenny Zhang, Maliha Rahman, Anita Pokharel, Myong Koag, Chun Wang, Rachel Lee, Grace Kubin                                                                                                                                                                                                                                                                                                                                                                                                                                                                                  |
| EPI_ISL_569908, EPI_ISL_569914, EPI_ISL_569917                                                                                                 | Innovative Genomics Institute, UC Berkeley                                                   | Innovative Genomics Institute, UC Berkeley                                                                           | Stacia Wyman, Haridha Shivram, Phil Frankino, Liana Lareau, Shana McDevitt, Justin Choi                                                                                                                                                                                                                                                                                                                                                                                                                                                                                                                 |
| EPI_ISL_570594, EPI_ISL_570636, EPI_ISL_570704, EPI_ISL_570715, EPI_ISL_570742, EPI_ISL_570752, EPI_ISL_570761, EPI_ISL_570835, EPI_ISL_570918 | UW Virology Lab                                                                              | UW Virology Lab                                                                                                      | Pavitra Roychoudhury, Hong Xie, Lasata Shrestha, Amin Addetia, Victoria M Rachleff, Meei-Li Huang, Keith R Jerome, Alexander Greninger                                                                                                                                                                                                                                                                                                                                                                                                                                                                  |
| EPI_ISL_574577                                                                                                                                 | Hospital Municipal Dr. Ignacio Proença de Gouveia                                            | Instituto Adolfo Lutz, Interdisciplinary Procedures Center, Strategic Laboratory                                     | Claudio Tavares Sacchi, Claudia Regina Gonçalves, Erica Valessa Ramos Gomes, Karoline Rodrigues Campos                                                                                                                                                                                                                                                                                                                                                                                                                                                                                                  |
| EPI_ISL_574653, EPI_ISL_574658, EPI_ISL_574659, EPI_ISL_574661                                                                                 | Seattle Flu Study                                                                            | Seattle Flu Study                                                                                                    | Deborah A. Nickerson, Chris D. Frazer, Jover Lee, Benjamin Pelle, Matthew Richardson, Amanda Adler, Elisabeth Brandstetter, Peter D. Han, Kairsten Fay, Misja Ilcisin, Kirsten Lacombe, Thomas R. Sibley, Melissa Truong, Caitlin R. Wolf, Karen Cowgill, Stephanie Schrag, Jeff Duchin, Michael Boeckh, Janet A. Englund, Michael Famulare, Barry R. Lutz, Mark J. Rieder, Lea M. Starita, Matthew Thompson, Helen Y. Chu, Trevor Bedford, Jay Shendure                                                                                                                                                |
| EPI_ISL_576259                                                                                                                                 | Instituto de Diagnostico y Referencia Epidemiologicos (INDRE)                                | Instituto de Diagnostico y Referencia Epidemiologicos (INDRE)                                                        | Gisela Barrera-Badillo, Abril Rodriguez-Maldonado, Claudia Wong-Arambula, Natividad Cruz-Ortiz, Tatiana Nunez-Garcia, Dayanaira Arellano-Suarez, Fabiola Garces-Ayala, Edgar Mendieta-Condado, Lucia Hernandez-Rivas, Irma Lopez-Martinez, Ernesto Ramirez-Gonzalez.                                                                                                                                                                                                                                                                                                                                    |
| EPI_ISL_576444, EPI_ISL_576450, EPI_ISL_576452, EPI_ISL_576468, EPI_ISL_576475                                                                 | UW Virology Lab                                                                              | UW Virology Lab                                                                                                      | Pavitra Roychoudhury, Hong Xie, Lasata Shrestha, Amin Addetia, Victoria M Rachleff, Meei-Li Huang, Keith R Jerome, Alexander Greninger                                                                                                                                                                                                                                                                                                                                                                                                                                                                  |
| EPI_ISL_577550                                                                                                                                 | Michigan Department of Health and Human Services, Bureau of Laboratories                     | Michigan Department of Health and Human Services, Bureau of Laboratories                                             | Blankenship HM, Riner D, Soehnlen MK                                                                                                                                                                                                                                                                                                                                                                                                                                                                                                                                                                    |
| EPI_ISL_579061                                                                                                                                 | Canterbury Health Laboratories                                                               | Institute of Environmental Science and Research (ESR)                                                                | Xiaoyun Ren, Matt Storey, Nikki Freed, Muhammad Faisal, Jing Wang, Hermes Perez, Anja Werno, Antje van der Linden, Arlo Upton, Chris Mansell, David Hammer, Dragana Drinkovic, Gary McAuliffe, Hana Sofia Andersson, James Ussher, Jill Sherwood, Josh Freeman, Julia Howard, Juliet Elvy, Mary DeAlmeida, Matt Blakiston, Matthew Rogers, Max Bloomfield, Michael Addidie, Michelle Balm, Sally Roberts, Sarah Jefferies, Sharmini Muttaiyah, Susan Morpeth, Susan Taylor, Timothy Blackmore, Vani Sathyendran, Veronica Playle, Virginia Hope, Erasmus Smit, Lauren Jelly, Olin Silander, Joep de Lig |
| EPI_ISL_582871, EPI_ISL_582897, EPI_ISL_582932                                                                                                 | County of Santa Clara Public Health Department                                               | Chan-Zuckerberg Biohub                                                                                               | CZB Ciliahub Consortium                                                                                                                                                                                                                                                                                                                                                                                                                                                                                                                                                                                 |
| EPI_ISL_583085, EPI_ISL_583090, EPI_ISL_583098, EPI_ISL_583103, EPI_ISL_583115, EPI_ISL_583126, EPI_ISL_583137, EPI_ISL_583139, EPI_ISL_583169 | Humboldt County Public Health Laboratory                                                     | Chan-Zuckerberg Biohub                                                                                               | CZB Ciliahub Consortium                                                                                                                                                                                                                                                                                                                                                                                                                                                                                                                                                                                 |
| EPI_ISL_583191                                                                                                                                 | San Francisco Public Health Laboratory                                                       | Chan-Zuckerberg Biohub                                                                                               | CZB Ciliahub Consortium                                                                                                                                                                                                                                                                                                                                                                                                                                                                                                                                                                                 |
| EPI_ISL_583220                                                                                                                                 | UCSF Clinical Microbiology Laboratory                                                        | Chan-Zuckerberg Biohub                                                                                               | CZB Ciliahub Consortium                                                                                                                                                                                                                                                                                                                                                                                                                                                                                                                                                                                 |
| EPI_ISL_583263, EPI_ISL_583273, EPI_ISL_583323                                                                                                 | University of Michigan Clinical Microbiology Laboratory                                      | Lauring Lab, University of Michigan, Department of Microbiology and Immunology                                       | Valesano                                                                                                                                                                                                                                                                                                                                                                                                                                                                                                                                                                                                |
| EPI_ISL_583506                                                                                                                                 | Michigan Department of Health and Human Services, Bureau of Laboratories                     | Michigan Department of Health and Human Services, Bureau of Laboratories                                             | Blankenship HM, Riner D, Soehnlen MK                                                                                                                                                                                                                                                                                                                                                                                                                                                                                                                                                                    |
| EPI_ISL_586260                                                                                                                                 | Alaska State Virology Laboratory                                                             | Alaska State Virology Laboratory                                                                                     | Jack Chen, Ph.D.                                                                                                                                                                                                                                                                                                                                                                                                                                                                                                                                                                                        |
| EPI_ISL_593704                                                                                                                                 | South Eastern Area Laboratory Services (SEALS)                                               | NSW Health Pathology - Institute of Clinical Pathology and Medical Research; Westmead Hospital; University of Sydney | CIDM-PH et al.                                                                                                                                                                                                                                                                                                                                                                                                                                                                                                                                                                                          |
| EPI_ISL_594353                                                                                                                                 | Florida Bureau of Public Health Laboratories                                                 | Florida Bureau of Public Health Laboratories                                                                         | Sarah Schmedes, Jason Blanton                                                                                                                                                                                                                                                                                                                                                                                                                                                                                                                                                                           |
| EPI_ISL_596408, EPI_ISL_596437                                                                                                                 | Seattle Flu Study                                                                            | Seattle Flu Study                                                                                                    | Deborah A. Nickerson, Chris D. Frazer, Jover Lee, Benjamin Pelle, Matthew Richardson, Amanda Adler, Elisabeth Brandstetter, Peter D. Han, Kairsten Fay, Misja Ilcisin, Kirsten Lacombe, Thomas R. Sibley, Melissa Truong, Caitlin R. Wolf, Karen Cowgill, Stephanie Schrag, Jeff Duchin, Michael Boeckh, Janet A. Englund, Michael Famulare, Barry R. Lutz, Mark J. Rieder, Lea M. Starita, Matthew Thompson, Helen Y. Chu, Trevor Bedford, Jay Shendure                                                                                                                                                |
| EPI_ISL_602167                                                                                                                                 | New Mexico Department of Health Scientific Laboratory                                        | New Mexico Department of Health Scientific Laboratory                                                                | Ellie Johnson, Anastacia Griego-Fisher, D'Eldra Malone                                                                                                                                                                                                                                                                                                                                                                                                                                                                                                                                                  |
| EPI_ISL_602981                                                                                                                                 | Minnesota Department of Health, Public Health Laboratory                                     | Minnesota Department of Health, Public Health Laboratory                                                             | Matt Plumb, Jacob Garfin, Alexandra Lorentz, and Xiong Wang                                                                                                                                                                                                                                                                                                                                                                                                                                                                                                                                             |
| EPI_ISL_605202, EPI_ISL_605237, EPI_ISL_605277, EPI_ISL_605370                                                                                 | Utah Public Health Laboratory                                                                | Utah Public Health Laboratory                                                                                        | Erin L. Young, Kelly Oakeson, Tara Gallagher, Michael T. Pyne, E. Susan Slechta, Melanie A. Mallory, Jeffrey B. Stevenson, Salika M. Shakir, David R. Hillyard                                                                                                                                                                                                                                                                                                                                                                                                                                          |
| EPI_ISL_605405, EPI_ISL_605474, EPI_ISL_605755                                                                                                 | University of Wisconsin-Madison AIDS Vaccine Research Laboratories                           | University of Wisconsin-Madison AIDS Vaccine Research Laboratories                                                   | Gage Moreno, Katarina Braun, et al. AIDS Vaccine Research Laboratories                                                                                                                                                                                                                                                                                                                                                                                                                                                                                                                                  |
| EPI_ISL_614015, EPI_ISL_614085                                                                                                                 | Virginia DCLS                                                                                | Virginia DCLS                                                                                                        | Virginia DCLS                                                                                                                                                                                                                                                                                                                                                                                                                                                                                                                                                                                           |
| EPI_ISL_614165, EPI_ISL_614170, EPI_ISL_614173, EPI_ISL_614177, EPI_ISL_614222                                                                 | Michigan Department of Health and Human Services, Bureau of Laboratories                     | Michigan Department of Health and Human Services, Bureau of Laboratories                                             | Blankenship HM, Riner D, Soehnlen MK                                                                                                                                                                                                                                                                                                                                                                                                                                                                                                                                                                    |
| EPI_ISL_618562                                                                                                                                 | Department of Virus and Microbiological Special Diagnostics, Statens Serum Institut, Denmark | Albertsen lab, Department of Chemistry and Bioscience, Aalborg University, Denmark                                   | Danish Covid-19 Genome Consortia                                                                                                                                                                                                                                                                                                                                                                                                                                                                                                                                                                        |
| EPI_ISL_623456                                                                                                                                 | Lighthouse Lab in Milton Keynes                                                              | Wellcome Sanger Institute for the COVID-19 Genomics UK (COG-UK) Consortium                                           | The Lighthouse Lab in Milton Keynes and Alex Alderton, Roberto Amato, Sonia Goncalves, Ewan Harrison, David K. Jackson, Ian Johnston, Dominic Kwiatkowski, Cordelia Langford, John Sillitoe on behalf of the Wellcome Sanger Institute COVID-19 Surveillance Team ( <a href="http://www.sanger.ac.uk/covid-team">http://www.sanger.ac.uk/covid-team</a> )                                                                                                                                                                                                                                               |
| EPI_ISL_625533                                                                                                                                 | Alameda County Public Health Lab                                                             | Chan-Zuckerberg Biohub                                                                                               | CZB Ciliahub Consortium                                                                                                                                                                                                                                                                                                                                                                                                                                                                                                                                                                                 |

|                                                                                                                                                                                                                                                |                                                                                              |                                                                                           |                                                                                                                                                                                                                                                                                                             |
|------------------------------------------------------------------------------------------------------------------------------------------------------------------------------------------------------------------------------------------------|----------------------------------------------------------------------------------------------|-------------------------------------------------------------------------------------------|-------------------------------------------------------------------------------------------------------------------------------------------------------------------------------------------------------------------------------------------------------------------------------------------------------------|
| EPI_ISL_628950                                                                                                                                                                                                                                 | Utah Public Health Laboratory                                                                | Utah Public Health Laboratory                                                             | Erin Young, Kelly Oakeson                                                                                                                                                                                                                                                                                   |
| EPI_ISL_632843                                                                                                                                                                                                                                 | New Mexico Department of Health Scientific Laboratory                                        | New Mexico Department of Health Scientific Laboratory                                     | Ellie Johnson, Anastacia Griego-Fisher, D'Eldra Malone                                                                                                                                                                                                                                                      |
| EPI_ISL_632890                                                                                                                                                                                                                                 | University of Wisconsin-Madison AIDS Vaccine Research Laboratories                           | University of Wisconsin-Madison AIDS Vaccine Research Laboratories                        | Gage Moreno, Katarina Braun, et al. AIDS Vaccine Research Laboratories                                                                                                                                                                                                                                      |
| EPI_ISL_632996                                                                                                                                                                                                                                 | DOHMH Crown Heights                                                                          | New York City Public Health Laboratory                                                    | Jade Wang, et al.                                                                                                                                                                                                                                                                                           |
| EPI_ISL_633049, EPI_ISL_633082                                                                                                                                                                                                                 | DOHMH Morrisania                                                                             | New York City Public Health Laboratory                                                    | Jade Wang, et al.                                                                                                                                                                                                                                                                                           |
| EPI_ISL_635300, EPI_ISL_635325, EPI_ISL_635326, EPI_ISL_635329, EPI_ISL_635347, EPI_ISL_635363                                                                                                                                                 | San Diego County Public Health Laboratory                                                    | Andersen lab at Scripps Research                                                          | SEARCH Alliance San Diego with Tracy Basler, Jovan Shephard, Brett Austin                                                                                                                                                                                                                                   |
| EPI_ISL_635495, EPI_ISL_635500, EPI_ISL_635512, EPI_ISL_635518, EPI_ISL_635528, EPI_ISL_635530, EPI_ISL_635550                                                                                                                                 | Centro de Diagnostico COVID-19 UABC Tijuana                                                  | Andersen lab at Scripps Research                                                          | SEARCH Alliance San Diego with Idanya Rubí Serafín Higuera, Manuel Sánchez Alavez, Jorge Luis Jiménez Niebla, Germán Ibarra, Jonathan Vincent Baena, Oscar Elfrén Zazueta Fierro                                                                                                                            |
| EPI_ISL_635578, EPI_ISL_635632, EPI_ISL_635633, EPI_ISL_635908, EPI_ISL_636059, EPI_ISL_636072, EPI_ISL_636073, EPI_ISL_636151, EPI_ISL_636179, EPI_ISL_636181                                                                                 | San Diego County Public Health Laboratory                                                    | Andersen lab at Scripps Research                                                          | SEARCH Alliance San Diego with Tracy Basler, Jovan Shephard, Brett Austin                                                                                                                                                                                                                                   |
| EPI_ISL_640144, EPI_ISL_640213, EPI_ISL_640215                                                                                                                                                                                                 | University of Michigan Clinical Microbiology Laboratory                                      | Lauring Lab, University of Michigan, Department of Microbiology and Immunology            | Valesano                                                                                                                                                                                                                                                                                                    |
| EPI_ISL_642431                                                                                                                                                                                                                                 | Lighthouse Lab in Glasgow                                                                    | Wellcome Sanger Institute for the COVID-19 Genomics UK (COG-UK) Consortium                | Harper VanSteenhouse, Yumi Kasai, David Gray, Carol Clugston, Anna Dominiczak and Alex Alderton, Roberto Amato, Sonia Goncalves, Ewan Harrison, David K. Jackson, Ian Johnston, Dominic Kwiatkowski, Cordelia Langford, John Sillitoe on behalf of the Wellcome Sanger Institute COVID-19 Surveillance Team |
| EPI_ISL_648272                                                                                                                                                                                                                                 | MD PHL                                                                                       | MD PHL                                                                                    | Maryland Department of Health Laboratories Administration                                                                                                                                                                                                                                                   |
| EPI_ISL_648441                                                                                                                                                                                                                                 | Santa Clara County Public Health Laboratory                                                  | Chan-Zuckerberg Biohub                                                                    | CZB Ciliahub Consortium                                                                                                                                                                                                                                                                                     |
| EPI_ISL_648522                                                                                                                                                                                                                                 | Orange County Public Health Lab                                                              | Chan-Zuckerberg Biohub                                                                    | CZB Ciliahub Consortium                                                                                                                                                                                                                                                                                     |
| EPI_ISL_648542                                                                                                                                                                                                                                 | Santa Clara County Public Health Laboratory                                                  | Chan-Zuckerberg Biohub                                                                    | CZB Ciliahub Consortium                                                                                                                                                                                                                                                                                     |
| EPI_ISL_648904, EPI_ISL_648911, EPI_ISL_648912, EPI_ISL_648915, EPI_ISL_648981, EPI_ISL_648982, EPI_ISL_648989, EPI_ISL_648998, EPI_ISL_649006                                                                                                 | San Diego County Public Health Laboratory                                                    | Andersen lab at Scripps Research                                                          | SEARCH Alliance San Diego with Tracy Basler, Jovan Shephard, Brett Austin                                                                                                                                                                                                                                   |
| EPI_ISL_649057, EPI_ISL_649058, EPI_ISL_649059                                                                                                                                                                                                 | University of Michigan Clinical Microbiology Laboratory                                      | Lauring Lab, University of Michigan, Department of Microbiology and Immunology            | Valesano                                                                                                                                                                                                                                                                                                    |
| EPI_ISL_649088                                                                                                                                                                                                                                 | Israel Central Virology laboratory                                                           | Israel Central Virology laboratory                                                        | Neta Zuckerman, Efrat Dahan Bucris, Oran Erster, Ella Mendelson, Michal Mandelboim                                                                                                                                                                                                                          |
| EPI_ISL_650022, EPI_ISL_650111                                                                                                                                                                                                                 | University of Michigan Clinical Microbiology Laboratory                                      | Lauring Lab, University of Michigan, Department of Microbiology and Immunology            | Valesano                                                                                                                                                                                                                                                                                                    |
| EPI_ISL_653299                                                                                                                                                                                                                                 | Florida Bureau of Public Health Laboratories                                                 | Florida Bureau of Public Health Laboratories                                              | Sarah Schmedes, Jason Blanton                                                                                                                                                                                                                                                                               |
| EPI_ISL_653365                                                                                                                                                                                                                                 | LSUHS Emerging Viral Threat Laboratory                                                       | Microbial Genome Sequencing Center                                                        | Maarten Van Diest, Jeremy P. Kamil, Rona S. Scott, Malgorzata Bienkowska-Haba, Katarzyna Zwolinska, Andrew D. Yurochko, Christopher G. Kevil, Martin J. Sapp, Daniel J. Snyder, Vaughn S. Cooper, John A. Vanchiere                                                                                         |
| EPI_ISL_656992                                                                                                                                                                                                                                 | Lighthouse Lab in Cambridge                                                                  | Wellcome Sanger Institute for the COVID-19 Genomics UK (COG-UK) Consortium                | Rob Howes, The Lighthouse Lab in Cambridge and Alex Alderton, Roberto Amato, Sonia Goncalves, Ewan Harrison, David K. Jackson, Ian Johnston, Dominic Kwiatkowski, Cordelia Langford, John Sillitoe on behalf of the Wellcome Sanger Institute COVID-19 Surveillance Team                                    |
| EPI_ISL_658658, EPI_ISL_658733                                                                                                                                                                                                                 | Lighthouse Lab in Glasgow                                                                    | Wellcome Sanger Institute for the COVID-19 Genomics UK (COG-UK) Consortium                | Harper VanSteenhouse, Yumi Kasai, David Gray, Carol Clugston, Anna Dominiczak and Alex Alderton, Roberto Amato, Sonia Goncalves, Ewan Harrison, David K. Jackson, Ian Johnston, Dominic Kwiatkowski, Cordelia Langford, John Sillitoe on behalf of the Wellcome Sanger Institute COVID-19 Surveillance Team |
| EPI_ISL_658868                                                                                                                                                                                                                                 | Instituto de Diagnostico y Referencia Epidemiologicos (INDRE)                                | Instituto de Diagnostico y Referencia Epidemiologicos (INDRE)                             | Gisela Barrera-Badillo , Abril Rodriguez-Maldonado, Claudia Wong-Arambula , Natividad Cruz-Ortiz, Tatiana Nunez-Garcia, Dayanira Arellano-Suarez, Fabiola Garces-Ayala, Lucia Hernandez-Rivas, Irma Lopez-Martinez, Ernesto Ramirez-Gonzalez.                                                               |
| EPI_ISL_660094                                                                                                                                                                                                                                 | MD PHL                                                                                       | MD PHL                                                                                    | Maryland Department of Health Laboratories Administration                                                                                                                                                                                                                                                   |
| EPI_ISL_660379                                                                                                                                                                                                                                 | Orebro klinisk mikrobiologi                                                                  | The Public Health Agency of Sweden                                                        | Anna-Malin Linde, Maria Lind Karlberg, Mattias Haukland, Reza Advani, Olov Svartstrom, Oskar Karlsson Lindsjo, Sandra Broddesson, Petra Edquist, Mia Brytting, Anna Risberg, Karin Tegmark-Wisell                                                                                                           |
| EPI_ISL_660419                                                                                                                                                                                                                                 | Klinisk mikrobiologi                                                                         | The Public Health Agency of Sweden                                                        | Anna-Malin Linde, Maria Lind Karlberg, Mattias Haukland, Reza Advani, Olov Svartstrom, Oskar Karlsson Lindsjo, Sandra Broddesson, Petra Edquist, Mia Brytting, Anna Risberg, Karin Tegmark-Wisell                                                                                                           |
| EPI_ISL_666618                                                                                                                                                                                                                                 | Environmental and Global Health, University of Florida                                       | Environmental and Global Health, University of Florida                                    | Loeb,J.C., Silva,L.O., Elbadry,M.A., Stephenson,C.J., Morris,J.G., Lednický,J.A.                                                                                                                                                                                                                            |
| EPI_ISL_666622                                                                                                                                                                                                                                 | Environmental and Global Health, University of Florida                                       | Environmental and Global Health, University of Florida                                    | Stephenson,C.J., Elbadry,M.A., Loeb,J.C., Silva,L.O., Morris,J.G., Lednický,J.A.                                                                                                                                                                                                                            |
| EPI_ISL_666636                                                                                                                                                                                                                                 | ZOTZ KLIMAS MVZ Düsseldorf-Centrum GbR ÜBAG für Labormedizin, Genetik, Zytologie, Pathologie | Center of Medical Microbiology, Virology, and Hospital Hygiene, University of Duesseldorf | Maximilian Damagnez, Alexander Dilthey, Ashley-Jane Duplessis, Patrick Finzer, Katrin Hoffmann, Torsten Houwaart, Lisanna Hülse, Malte Kohns Vasconcelos, Marek Korenca, Nadine Lübke, Jessica Nicolai, Klaus Pfeffer, Daniel Strelow, Jörg Timm, Andreas Walker, Tobias Wienemann, Rainer Zotz             |
| EPI_ISL_666963                                                                                                                                                                                                                                 | Michigan Department of Health and Human Services, Bureau of Laboratories                     | Michigan Department of Health and Human Services, Bureau of Laboratories                  | Blankenship HM, Riner D, Soehnlén MK                                                                                                                                                                                                                                                                        |
| EPI_ISL_667063                                                                                                                                                                                                                                 | San Diego County Public Health Laboratory                                                    | Andersen lab at Scripps Research                                                          | SEARCH Alliance San Diego with Tracy Basler, Jovan Shephard, Brett Austin                                                                                                                                                                                                                                   |
| EPI_ISL_667122, EPI_ISL_667176, EPI_ISL_667237, EPI_ISL_667254, EPI_ISL_667275, EPI_ISL_667333, EPI_ISL_667370, EPI_ISL_667394, EPI_ISL_667426, EPI_ISL_667463, EPI_ISL_667468, EPI_ISL_667491, EPI_ISL_667493, EPI_ISL_667501, EPI_ISL_667514 | see above                                                                                    | OHSU Lab Services Molecular Microbiology Lab                                              | Brendan L. O'Connell, Ruth V. Nichols, Sally Grindstaff, Alec J. Hirsch, Donna Hansel, Guang Fan, Daniel N. Streblow, William B. Messer, Andrew C. Adey, Benjamin N. Bimber, Brian J. O'Roak                                                                                                                |
| EPI_ISL_6671679                                                                                                                                                                                                                                | DOHMH Morrisania                                                                             | New York City Public Health Laboratory                                                    | Jade Wang, et al.                                                                                                                                                                                                                                                                                           |
| EPI_ISL_672037                                                                                                                                                                                                                                 | Madera County Department of Public Health                                                    | Chan-Zuckerberg Biohub                                                                    | CZB Ciliahub Consortium                                                                                                                                                                                                                                                                                     |
| EPI_ISL_672058                                                                                                                                                                                                                                 | The Ashley Laboratory, Stanford University                                                   | Chan-Zuckerberg Biohub                                                                    | CZB Ciliahub Consortium                                                                                                                                                                                                                                                                                     |
| EPI_ISL_672081                                                                                                                                                                                                                                 | Madera County Department of Public Health                                                    | Chan-Zuckerberg Biohub                                                                    | CZB Ciliahub Consortium                                                                                                                                                                                                                                                                                     |
| EPI_ISL_672192, EPI_ISL_672206                                                                                                                                                                                                                 | The Ashley Laboratory, Stanford University                                                   | Chan-Zuckerberg Biohub                                                                    | CZB Ciliahub Consortium                                                                                                                                                                                                                                                                                     |
| EPI_ISL_672404, EPI_ISL_672408, EPI_ISL_672421                                                                                                                                                                                                 | Madera County Department of Public Health                                                    | Chan-Zuckerberg Biohub                                                                    | CZB Ciliahub Consortium                                                                                                                                                                                                                                                                                     |

|                                                                                                                                                                                                                                                                                                                                                                                                                                                                                                                                                                                                                                                                                                                                                                                                                                                |                                                           |                                                                                                                                                                                                                      |                                                                                                                                                                                                                                                                                                                                                                                                                                                                                                                                                                                           |
|------------------------------------------------------------------------------------------------------------------------------------------------------------------------------------------------------------------------------------------------------------------------------------------------------------------------------------------------------------------------------------------------------------------------------------------------------------------------------------------------------------------------------------------------------------------------------------------------------------------------------------------------------------------------------------------------------------------------------------------------------------------------------------------------------------------------------------------------|-----------------------------------------------------------|----------------------------------------------------------------------------------------------------------------------------------------------------------------------------------------------------------------------|-------------------------------------------------------------------------------------------------------------------------------------------------------------------------------------------------------------------------------------------------------------------------------------------------------------------------------------------------------------------------------------------------------------------------------------------------------------------------------------------------------------------------------------------------------------------------------------------|
| EPI_ISL_672438                                                                                                                                                                                                                                                                                                                                                                                                                                                                                                                                                                                                                                                                                                                                                                                                                                 | Santa Clara County Public Health Laboratory               | Chan-Zuckerberg Biohub                                                                                                                                                                                               | CZB Ciliahub Consortium                                                                                                                                                                                                                                                                                                                                                                                                                                                                                                                                                                   |
| EPI_ISL_672465                                                                                                                                                                                                                                                                                                                                                                                                                                                                                                                                                                                                                                                                                                                                                                                                                                 | Alameda County Public Health Lab                          | Chan-Zuckerberg Biohub                                                                                                                                                                                               | CZB Ciliahub Consortium                                                                                                                                                                                                                                                                                                                                                                                                                                                                                                                                                                   |
| EPI_ISL_672509, EPI_ISL_672510, EPI_ISL_672517, EPI_ISL_672521                                                                                                                                                                                                                                                                                                                                                                                                                                                                                                                                                                                                                                                                                                                                                                                 | Madera County Department of Public Health                 | Chan-Zuckerberg Biohub                                                                                                                                                                                               | CZB Ciliahub Consortium                                                                                                                                                                                                                                                                                                                                                                                                                                                                                                                                                                   |
| EPI_ISL_678654, EPI_ISL_676657, EPI_ISL_676677, EPI_ISL_676685, EPI_ISL_676686, EPI_ISL_676693, EPI_ISL_676703, EPI_ISL_676707, EPI_ISL_676708, EPI_ISL_676717, EPI_ISL_676730, EPI_ISL_676747, EPI_ISL_676765, EPI_ISL_676777, EPI_ISL_676781, EPI_ISL_676784, EPI_ISL_676785, EPI_ISL_676791, EPI_ISL_676792, EPI_ISL_676796, EPI_ISL_676804, EPI_ISL_676807, EPI_ISL_676809, EPI_ISL_676814, EPI_ISL_676831, EPI_ISL_676838, EPI_ISL_676863, EPI_ISL_676864, EPI_ISL_676889, EPI_ISL_676893, EPI_ISL_676911, EPI_ISL_676913, EPI_ISL_676914, EPI_ISL_676916, EPI_ISL_676917, EPI_ISL_676918, EPI_ISL_676919, EPI_ISL_676927, EPI_ISL_676928, EPI_ISL_676930, EPI_ISL_676937, EPI_ISL_676945, EPI_ISL_676966, EPI_ISL_676967, EPI_ISL_676977, EPI_ISL_676987, EPI_ISL_676988, EPI_ISL_676989, EPI_ISL_676990, EPI_ISL_676991, EPI_ISL_676992 | Wadsworth Center, New York State Department.of Health     | Wadsworth Center, New York State Department.of Health<br>Kirsten St. George, Daryl M. Lamson, Alexis Russel, Jonathan Plitnick, Navjot Singh, John Kelly, Sara Griesemer, Erasmus Schneider, Erica Lasek-Nesselquist |                                                                                                                                                                                                                                                                                                                                                                                                                                                                                                                                                                                           |
| EPI_ISL_677054, EPI_ISL_677062                                                                                                                                                                                                                                                                                                                                                                                                                                                                                                                                                                                                                                                                                                                                                                                                                 | Masonic Medical Research Institute                        | Wadsworth Center, New York State Department.of Health                                                                                                                                                                | Nathan Tucker, Kirsten St. George, Daryl M. Lamson, Alexis Russel, Jonathan Plitnick, Navjot Singh, John Kelly, Sara Griesemer, Erasmus Schneider, Erica Lasek-Nesselquist                                                                                                                                                                                                                                                                                                                                                                                                                |
| EPI_ISL_677092, EPI_ISL_677095, EPI_ISL_677097, EPI_ISL_677098, EPI_ISL_677107                                                                                                                                                                                                                                                                                                                                                                                                                                                                                                                                                                                                                                                                                                                                                                 | Wadsworth Center, New York State Department.of Health     | Wadsworth Center, New York State Department.of Health                                                                                                                                                                | Kirsten St. George, Daryl M. Lamson, Alexis Russel, Jonathan Plitnick, Navjot Singh, John Kelly, Sara Griesemer, Erasmus Schneider, Erica Lasek-Nesselquist                                                                                                                                                                                                                                                                                                                                                                                                                               |
| EPI_ISL_677116, EPI_ISL_677117, EPI_ISL_677119, EPI_ISL_677122, EPI_ISL_677129                                                                                                                                                                                                                                                                                                                                                                                                                                                                                                                                                                                                                                                                                                                                                                 | Masonic Medical Research Institute                        | Wadsworth Center, New York State Department.of Health                                                                                                                                                                | Nathan Tucker, Kirsten St. George, Daryl M. Lamson, Alexis Russel, Jonathan Plitnick, Navjot Singh, John Kelly, Sara Griesemer, Erasmus Schneider, Erica Lasek-Nesselquist                                                                                                                                                                                                                                                                                                                                                                                                                |
| EPI_ISL_677133                                                                                                                                                                                                                                                                                                                                                                                                                                                                                                                                                                                                                                                                                                                                                                                                                                 | Wadsworth Center, New York State Department.of Health     | Wadsworth Center, New York State Department.of Health                                                                                                                                                                | Kirsten St. George, Daryl M. Lamson, Alexis Russel, Jonathan Plitnick, Navjot Singh, John Kelly, Sara Griesemer, Erasmus Schneider, Erica Lasek-Nesselquist                                                                                                                                                                                                                                                                                                                                                                                                                               |
| EPI_ISL_677298, EPI_ISL_677311                                                                                                                                                                                                                                                                                                                                                                                                                                                                                                                                                                                                                                                                                                                                                                                                                 | Colorado Department of Public Health and Environment      | Colorado Department of Puplic Health and Environment                                                                                                                                                                 | Laura Bankers, Molly Hetherington-Rauth, Shannon Ely, Shannon R. Matzinger, Sarah Elizabeth Totten, Emily A. Travanty                                                                                                                                                                                                                                                                                                                                                                                                                                                                     |
| EPI_ISL_677664, EPI_ISL_677666                                                                                                                                                                                                                                                                                                                                                                                                                                                                                                                                                                                                                                                                                                                                                                                                                 | Wadsworth Center, New York State Department.of Health     | Wadsworth Center, New York State Department.of Health                                                                                                                                                                | Kirsten St. George, Daryl M. Lamson, Alexis Russel, Jonathan Plitnick, Navjot Singh, John Kelly, Sara Griesemer, Erasmus Schneider, Erica Lasek-Nesselquist                                                                                                                                                                                                                                                                                                                                                                                                                               |
| EPI_ISL_677669                                                                                                                                                                                                                                                                                                                                                                                                                                                                                                                                                                                                                                                                                                                                                                                                                                 | Masonic Medical Research Institute                        | Wadsworth Center, New York State Department.of Health                                                                                                                                                                | Nathan Tucker, Kirsten St. George, Daryl M. Lamson, Alexis Russel, Jonathan Plitnick, Navjot Singh, John Kelly, Sara Griesemer, Erasmus Schneider, Erica Lasek-Nesselquist                                                                                                                                                                                                                                                                                                                                                                                                                |
| EPI_ISL_677673                                                                                                                                                                                                                                                                                                                                                                                                                                                                                                                                                                                                                                                                                                                                                                                                                                 | Wadsworth Center, New York State Department.of Health     | Wadsworth Center, New York State Department.of Health                                                                                                                                                                | Kirsten St. George, Daryl M. Lamson, Alexis Russel, Jonathan Plitnick, Navjot Singh, John Kelly, Sara Griesemer, Erasmus Schneider, Erica Lasek-Nesselquist                                                                                                                                                                                                                                                                                                                                                                                                                               |
| EPI_ISL_677868                                                                                                                                                                                                                                                                                                                                                                                                                                                                                                                                                                                                                                                                                                                                                                                                                                 | Innovative Genomics Institute, UC Berkeley                | Innovative Genomics Institute, UC Berkeley                                                                                                                                                                           | Stacia Wyman, Haridha Shivram, Phil Frankino, Liana Lareau, Shana McDevitt, Justin Choi                                                                                                                                                                                                                                                                                                                                                                                                                                                                                                   |
| EPI_ISL_682283                                                                                                                                                                                                                                                                                                                                                                                                                                                                                                                                                                                                                                                                                                                                                                                                                                 | Canterbury Health Laboratories                            | Institute of Environmental Science and Research (ESR)                                                                                                                                                                | Xiaoyun Ren, Matt Storey, Muhammad Faisal, Jing Wang, Hermes Perez, Anja Werno, Antje van der Linden, Arlo Upton, Chris Mansell, David Hammer, Dragana Drinkovic, Gary McAuliffe, Hana Sofia Andersson, James Ussher, Jill Sherwood, Josh Freeman, Julia Howard, Juliet Ely, Mary DeAlmeida, Matt Blakiston, Matthew Rogers, Max Bloomfield, Michael Addidle, Michelle Balm, Sally Roberts, Sarah Jefferies, Sharmini Muttaiyah, Susan Morpeth, Susan Taylor, Timothy Blackmore, Vani Sathyendran, Veronica Playle, Virginia Hope, Erasmus Smit, Lauren Jelly, Olin Silander, Joep de Lig |
| EPI_ISL_683708, EPI_ISL_683709                                                                                                                                                                                                                                                                                                                                                                                                                                                                                                                                                                                                                                                                                                                                                                                                                 | Essentia Health-St. Mary's Medical Center                 | Minnesota Department of Health, Public Health Laboratory                                                                                                                                                             | Alexandra Lorentz, Jacob Garfin, Matt Plumb, and Xiong Wang                                                                                                                                                                                                                                                                                                                                                                                                                                                                                                                               |
| EPI_ISL_683790                                                                                                                                                                                                                                                                                                                                                                                                                                                                                                                                                                                                                                                                                                                                                                                                                                 | DOHMH Morrisania                                          | New York City Public Health Laboratory                                                                                                                                                                               | Jade Wang, et al.                                                                                                                                                                                                                                                                                                                                                                                                                                                                                                                                                                         |
| EPI_ISL_683800                                                                                                                                                                                                                                                                                                                                                                                                                                                                                                                                                                                                                                                                                                                                                                                                                                 | DOHMH Corona                                              | New York City Public Health Laboratory                                                                                                                                                                               | Jade Wang, et al.                                                                                                                                                                                                                                                                                                                                                                                                                                                                                                                                                                         |
| EPI_ISL_683803, EPI_ISL_683804                                                                                                                                                                                                                                                                                                                                                                                                                                                                                                                                                                                                                                                                                                                                                                                                                 | DOHMH Morrisania                                          | New York City Public Health Laboratory                                                                                                                                                                               | Jade Wang, et al.                                                                                                                                                                                                                                                                                                                                                                                                                                                                                                                                                                         |
| EPI_ISL_683816                                                                                                                                                                                                                                                                                                                                                                                                                                                                                                                                                                                                                                                                                                                                                                                                                                 | DOHMH Fort Greene                                         | New York City Public Health Laboratory                                                                                                                                                                               | Jade Wang, et al.                                                                                                                                                                                                                                                                                                                                                                                                                                                                                                                                                                         |
| EPI_ISL_683903                                                                                                                                                                                                                                                                                                                                                                                                                                                                                                                                                                                                                                                                                                                                                                                                                                 | DOHMH Jamaica                                             | New York City Public Health Laboratory                                                                                                                                                                               | Jade Wang, et al.                                                                                                                                                                                                                                                                                                                                                                                                                                                                                                                                                                         |
| EPI_ISL_683907                                                                                                                                                                                                                                                                                                                                                                                                                                                                                                                                                                                                                                                                                                                                                                                                                                 | DOHMH Riverside                                           | New York City Public Health Laboratory                                                                                                                                                                               | Jade Wang, et al.                                                                                                                                                                                                                                                                                                                                                                                                                                                                                                                                                                         |
| EPI_ISL_683968                                                                                                                                                                                                                                                                                                                                                                                                                                                                                                                                                                                                                                                                                                                                                                                                                                 | DOHMH Central Harlem                                      | New York City Public Health Laboratory                                                                                                                                                                               | Jade Wang, et al.                                                                                                                                                                                                                                                                                                                                                                                                                                                                                                                                                                         |
| EPI_ISL_683979                                                                                                                                                                                                                                                                                                                                                                                                                                                                                                                                                                                                                                                                                                                                                                                                                                 | DOHMH Corona                                              | New York City Public Health Laboratory                                                                                                                                                                               | Jade Wang, et al.                                                                                                                                                                                                                                                                                                                                                                                                                                                                                                                                                                         |
| EPI_ISL_683991                                                                                                                                                                                                                                                                                                                                                                                                                                                                                                                                                                                                                                                                                                                                                                                                                                 | DOHMH Central Harlem                                      | New York City Public Health Laboratory                                                                                                                                                                               | Jade Wang, et al.                                                                                                                                                                                                                                                                                                                                                                                                                                                                                                                                                                         |
| EPI_ISL_693206                                                                                                                                                                                                                                                                                                                                                                                                                                                                                                                                                                                                                                                                                                                                                                                                                                 | Hospital Municipal Mario Gatti                            | Instituto Adolfo Lutz, Interdisciplinary Procedures Center, Strategic Laboratory                                                                                                                                     | Claudio Tavares Sacchi, Claudia Regina Gonçalves, Erica Valessa Ramos Gomes, Karoline Rodrigues Campos                                                                                                                                                                                                                                                                                                                                                                                                                                                                                    |
| EPI_ISL_693233                                                                                                                                                                                                                                                                                                                                                                                                                                                                                                                                                                                                                                                                                                                                                                                                                                 | Hospital Santa Cruz                                       | Instituto Adolfo Lutz, Interdisciplinary Procedures Center, Strategic Laboratory                                                                                                                                     | Claudio Tavares Sacchi, Claudia Regina Gonçalves, Erica Valessa Ramos Gomes, Karoline Rodrigues Campos                                                                                                                                                                                                                                                                                                                                                                                                                                                                                    |
| EPI_ISL_693242                                                                                                                                                                                                                                                                                                                                                                                                                                                                                                                                                                                                                                                                                                                                                                                                                                 | Centro de Vigilância a Saude de Diadema                   | Instituto Adolfo Lutz, Interdisciplinary Procedures Center, Strategic Laboratory                                                                                                                                     | Claudio Tavares Sacchi, Claudia Regina Gonçalves, Erica Valessa Ramos Gomes, Karoline Rodrigues Campos                                                                                                                                                                                                                                                                                                                                                                                                                                                                                    |
| EPI_ISL_694429, EPI_ISL_694443                                                                                                                                                                                                                                                                                                                                                                                                                                                                                                                                                                                                                                                                                                                                                                                                                 | TGen North                                                | TGen North                                                                                                                                                                                                           | Jolene Bowers, Megan Folkerts, Chris French, Hayley Yaglom, Ashlyn Pfeiffer, Darrin Lemmer, Dave Engelthaler, The Arizona COVID Genomics Union (ACGU)                                                                                                                                                                                                                                                                                                                                                                                                                                     |
| EPI_ISL_694545                                                                                                                                                                                                                                                                                                                                                                                                                                                                                                                                                                                                                                                                                                                                                                                                                                 | AZ SPHL, Arizona Department of Health Services            | TGen North                                                                                                                                                                                                           | Jolene Bowers, Megan Folkerts, Chris French, Hayley Yaglom, Ashlyn Pfeiffer, Darrin Lemmer, Dave Engelthaler, The Arizona COVID Genomics Union (ACGU)                                                                                                                                                                                                                                                                                                                                                                                                                                     |
| EPI_ISL_694627, EPI_ISL_694879, EPI_ISL_694960, EPI_ISL_695000, EPI_ISL_695075, EPI_ISL_695229, EPI_ISL_695257, EPI_ISL_695258, EPI_ISL_695259, EPI_ISL_695264, EPI_ISL_695271, EPI_ISL_695275                                                                                                                                                                                                                                                                                                                                                                                                                                                                                                                                                                                                                                                 | TGen North                                                | TGen North                                                                                                                                                                                                           | Jolene Bowers, Megan Folkerts, Chris French, Hayley Yaglom, Ashlyn Pfeiffer, Darrin Lemmer, Dave Engelthaler, The Arizona COVID Genomics Union (ACGU)                                                                                                                                                                                                                                                                                                                                                                                                                                     |
| EPI_ISL_695486, EPI_ISL_695487, EPI_ISL_695488, EPI_ISL_695507, EPI_ISL_695515                                                                                                                                                                                                                                                                                                                                                                                                                                                                                                                                                                                                                                                                                                                                                                 | AZ SPHL, Arizona Department of Health Services            | TGen North                                                                                                                                                                                                           | Jolene Bowers, Megan Folkerts, Chris French, Hayley Yaglom, Ashlyn Pfeiffer, Darrin Lemmer, Dave Engelthaler, The Arizona COVID Genomics Union (ACGU)                                                                                                                                                                                                                                                                                                                                                                                                                                     |
| EPI_ISL_695536, EPI_ISL_695619, EPI_ISL_695622, EPI_ISL_695658, EPI_ISL_695702, EPI_ISL_695707                                                                                                                                                                                                                                                                                                                                                                                                                                                                                                                                                                                                                                                                                                                                                 | TGen North                                                | TGen North                                                                                                                                                                                                           | Jolene Bowers, Megan Folkerts, Chris French, Hayley Yaglom, Ashlyn Pfeiffer, Darrin Lemmer, Dave Engelthaler, The Arizona COVID Genomics Union (ACGU)                                                                                                                                                                                                                                                                                                                                                                                                                                     |
| EPI_ISL_695747, EPI_ISL_695749                                                                                                                                                                                                                                                                                                                                                                                                                                                                                                                                                                                                                                                                                                                                                                                                                 | AZ SPHL, Arizona Department of Health Services            | TGen North                                                                                                                                                                                                           | Jolene Bowers, Megan Folkerts, Chris French, Hayley Yaglom, Ashlyn Pfeiffer, Darrin Lemmer, Dave Engelthaler, The Arizona COVID Genomics Union (ACGU)                                                                                                                                                                                                                                                                                                                                                                                                                                     |
| EPI_ISL_696257                                                                                                                                                                                                                                                                                                                                                                                                                                                                                                                                                                                                                                                                                                                                                                                                                                 | Sonora Quest Laboratories, Laboratory Sciences of Arizona | TGen North                                                                                                                                                                                                           | Jolene Bowers, Megan Folkerts, Chris French, Hayley Yaglom, Ashlyn Pfeiffer, Darrin Lemmer, Dave Engelthaler, The Arizona COVID Genomics Union (ACGU)                                                                                                                                                                                                                                                                                                                                                                                                                                     |
| EPI_ISL_700470                                                                                                                                                                                                                                                                                                                                                                                                                                                                                                                                                                                                                                                                                                                                                                                                                                 | D'Almeida Clinic wc DAL                                   | NHLS/UCT                                                                                                                                                                                                             | Houriyah Tegally, Arash Iranzadeh, Deelan Doolabh, Lynn Tyers, Bruna Galvao, Innocent Mudau, Marvin Hsiao, Kruger Marais, Diana Hardie, Stephen Korsman, Carolyn Williamson                                                                                                                                                                                                                                                                                                                                                                                                               |
| EPI_ISL_700723                                                                                                                                                                                                                                                                                                                                                                                                                                                                                                                                                                                                                                                                                                                                                                                                                                 | Texas Department of State Health Services                 | Texas Department of State Health Services                                                                                                                                                                            | Rashmi Tuladhar, Bonnie Oh, Jenny Zhang, Maliha Rahman, Anita Pokharel, Myong Koag, Chung Wang, Rachel Lee, Grace Kubin, Mayela Pedrueza, James Daniel Bonser                                                                                                                                                                                                                                                                                                                                                                                                                             |

|                                                                                                                                                                                                                                                                                                                                                                                                                                                                                                                                                                                                                                                                                                                                                                                                                                                                                                                                |                                                                                                                                                                       |                                                                                                                                                                                                                                                                                                                                                                          |                                                                                                                                                                                                                                                                                                                                                                                                                                                                        |
|--------------------------------------------------------------------------------------------------------------------------------------------------------------------------------------------------------------------------------------------------------------------------------------------------------------------------------------------------------------------------------------------------------------------------------------------------------------------------------------------------------------------------------------------------------------------------------------------------------------------------------------------------------------------------------------------------------------------------------------------------------------------------------------------------------------------------------------------------------------------------------------------------------------------------------|-----------------------------------------------------------------------------------------------------------------------------------------------------------------------|--------------------------------------------------------------------------------------------------------------------------------------------------------------------------------------------------------------------------------------------------------------------------------------------------------------------------------------------------------------------------|------------------------------------------------------------------------------------------------------------------------------------------------------------------------------------------------------------------------------------------------------------------------------------------------------------------------------------------------------------------------------------------------------------------------------------------------------------------------|
| EPI_ISL_702770                                                                                                                                                                                                                                                                                                                                                                                                                                                                                                                                                                                                                                                                                                                                                                                                                                                                                                                 | Lighthouse Lab in Alderley Park                                                                                                                                       | Wellcome Sanger Institute for the COVID-19 Genomics UK (COG-UK) Consortium                                                                                                                                                                                                                                                                                               | Jacquelyn Wynn, Mairead Hyland, The Lighthouse Lab in Alderley Park and Alex Alderton, Roberto Amato, Sonia Goncalves, Ewan Harrison, David K. Jackson, Ian Johnston, Dominic Kwiatkowski, Cordelia Langford, John Sillitoe on behalf of the Wellcome Sanger Institute COVID-19 Surveillance Team                                                                                                                                                                      |
| EPI_ISL_707791                                                                                                                                                                                                                                                                                                                                                                                                                                                                                                                                                                                                                                                                                                                                                                                                                                                                                                                 | 1-Laboratory of Microbiology, National Reference Lab, Charles Nicolle Hospital; 2-University of Tunis ElManar, Faculty of Medicine of Tunis, LR99ES09, Tunis, Tunisia | 1-Clinical and Experimental Pharmacology Lab, LR16SP02, National Center of Pharmacovigilance, University of Tunis El Manar, Tunis, Tunisia. 2-Neurodegenerative diseases and psychiatric troubles, LR18SP03, Razi Hospital, University of Tunis El Manar, Tunis, Tunisia. 3- Ministry of Health, National Observatory of New and Emerging Diseases, 1006, Tunis, Tunisia | Ilhem Boutiba-Ben Boubaker, Sameh Trabelsi, Nissaf Ben Alaya, Maher Kharrat, Alia Ben Kahla, Jalila Ben Khelli, Salma Abid, Sana Ferjani, Mouna Ben Sassi, Mouna Safer, Awatef El Moussi, Habiba Ben Romdhane, Souissi Amira, Ines Mardini, Hanen El Jebari, Asma Ferjani, Gaies Emna, Riadh Dagfhous, Riadh Gouider.                                                                                                                                                  |
| EPI_ISL_707809, EPI_ISL_707852                                                                                                                                                                                                                                                                                                                                                                                                                                                                                                                                                                                                                                                                                                                                                                                                                                                                                                 | University of Michigan Clinical Microbiology Laboratory                                                                                                               | Lauring Lab, University of Michigan, Department of Microbiology and Immunology                                                                                                                                                                                                                                                                                           | Valesano                                                                                                                                                                                                                                                                                                                                                                                                                                                               |
| EPI_ISL_707911                                                                                                                                                                                                                                                                                                                                                                                                                                                                                                                                                                                                                                                                                                                                                                                                                                                                                                                 | Los Angeles County Public Health Laboratory                                                                                                                           | Los Angeles County Public Health Laboratory                                                                                                                                                                                                                                                                                                                              | P. Hemarajata et al.                                                                                                                                                                                                                                                                                                                                                                                                                                                   |
| EPI_ISL_708356, EPI_ISL_708553, EPI_ISL_708554                                                                                                                                                                                                                                                                                                                                                                                                                                                                                                                                                                                                                                                                                                                                                                                                                                                                                 | Michigan Department of Health and Human Services, Bureau of Laboratories                                                                                              | Michigan Department of Health and Human Services, Bureau of Laboratories                                                                                                                                                                                                                                                                                                 | Blankenship HM, Riner D, Soehnlen MK                                                                                                                                                                                                                                                                                                                                                                                                                                   |
| EPI_ISL_710108                                                                                                                                                                                                                                                                                                                                                                                                                                                                                                                                                                                                                                                                                                                                                                                                                                                                                                                 | Los Angeles County PHL                                                                                                                                                | Los Angeles County PHL                                                                                                                                                                                                                                                                                                                                                   | P. Hemarajata et al.                                                                                                                                                                                                                                                                                                                                                                                                                                                   |
| EPI_ISL_710155, EPI_ISL_710238, EPI_ISL_710239, EPI_ISL_710277, EPI_ISL_710356                                                                                                                                                                                                                                                                                                                                                                                                                                                                                                                                                                                                                                                                                                                                                                                                                                                 | Colorado Department of Public Health and Environment                                                                                                                  | Colorado Department of Public Health and Environment                                                                                                                                                                                                                                                                                                                     | Laura Bankers, Molly C. Hetherington-Rauth, Shannon Ely, Shannon R. Matzinger, Sarah Elizabeth Totten, Emily A. Travanty                                                                                                                                                                                                                                                                                                                                               |
| EPI_ISL_710423                                                                                                                                                                                                                                                                                                                                                                                                                                                                                                                                                                                                                                                                                                                                                                                                                                                                                                                 | Los Angeles County PHL                                                                                                                                                | Los Angeles County PHL                                                                                                                                                                                                                                                                                                                                                   | P. Hemarajata et al.                                                                                                                                                                                                                                                                                                                                                                                                                                                   |
| EPI_ISL_714546                                                                                                                                                                                                                                                                                                                                                                                                                                                                                                                                                                                                                                                                                                                                                                                                                                                                                                                 | Department of Virus and Microbiological Special Diagnostics, Statens Serum Institut, Copenhagen, Denmark                                                              | Albertsen Lab, Department of Chemistry and Bioscience, Aalborg University, Denmark                                                                                                                                                                                                                                                                                       | Danish Covid-19 Genome Consortium                                                                                                                                                                                                                                                                                                                                                                                                                                      |
| EPI_ISL_717701                                                                                                                                                                                                                                                                                                                                                                                                                                                                                                                                                                                                                                                                                                                                                                                                                                                                                                                 | Area of Virology, Serology and Virology Division (SAVID), New South Wales Health Pathology Randwick                                                                   | Virology Research Laboratory; Area of Virology, Serology and Virology Division (SAVID), New South Wales Health Pathology Randwick                                                                                                                                                                                                                                        | Foster, C.; Au, J.; Ruiz Silva, M.; Deveson, I.; Bull, R.; Van Hal, S.; Rawlinson, W.                                                                                                                                                                                                                                                                                                                                                                                  |
| EPI_ISL_717733, EPI_ISL_717736, EPI_ISL_717748, EPI_ISL_717750, EPI_ISL_717754, EPI_ISL_717761, EPI_ISL_717763                                                                                                                                                                                                                                                                                                                                                                                                                                                                                                                                                                                                                                                                                                                                                                                                                 | Kingston Health Sciences Centre and Queen's University                                                                                                                | Ontario Institute for Cancer Research                                                                                                                                                                                                                                                                                                                                    | Prameet M. Sheth, Calvin Sjaarda, Robert Colautti, Katya Douchant, Ilinca Lungu, Bernard Lam, Paul Krzyzanowski, Michael Laszloffy, Lawrence E. Heisler, Richard de Borja, Jared T. Simpson                                                                                                                                                                                                                                                                            |
| EPI_ISL_717779                                                                                                                                                                                                                                                                                                                                                                                                                                                                                                                                                                                                                                                                                                                                                                                                                                                                                                                 | UW Virology Lab                                                                                                                                                       | UW Virology Lab                                                                                                                                                                                                                                                                                                                                                          | Pavitra Roychoudhury, Hong Xie, Lasata Shrestha, Michelle Lin, Meei-Li Huang, Keith R Jerome, Alexander Greninger                                                                                                                                                                                                                                                                                                                                                      |
| EPI_ISL_718059                                                                                                                                                                                                                                                                                                                                                                                                                                                                                                                                                                                                                                                                                                                                                                                                                                                                                                                 | ZOTZ KLIMAS MVZ Düsseldorf-Centrum GbR ÜBAG für Labormedizin, Genetik, Zytologie, Pathologie                                                                          | Center of Medical Microbiology, Virology, and Hospital Hygiene, University of Duesseldorf                                                                                                                                                                                                                                                                                | Maximilian Damagnez, Alexander Dilthey, Ashley-Jane Duplessis, Patrick Finzer, Katrin Hoffmann, Torsten Houwaart, Lisanna Hülse, Malte Kohns Vasconcelos, Marek Korencak, Nadine Lübke, Jessica Nicolai, Klaus Pfeffer, Daniel Strelow, Jörg Timm, Andreas Walker, Tobias Wienemann, Rainer Zofz                                                                                                                                                                       |
| EPI_ISL_718105                                                                                                                                                                                                                                                                                                                                                                                                                                                                                                                                                                                                                                                                                                                                                                                                                                                                                                                 | Kingston Health Sciences Centre and Queen's University                                                                                                                | Ontario Institute for Cancer Research                                                                                                                                                                                                                                                                                                                                    | Prameet M. Sheth, Calvin Sjaarda, Robert Colautti, Katya Douchant, Ilinca Lungu, Bernard Lam, Paul Krzyzanowski, Michael Laszloffy, Lawrence E. Heisler, Richard de Borja, Jared T. Simpson                                                                                                                                                                                                                                                                            |
| EPI_ISL_720858                                                                                                                                                                                                                                                                                                                                                                                                                                                                                                                                                                                                                                                                                                                                                                                                                                                                                                                 | Lighthouse Lab in Alderley Park                                                                                                                                       | Wellcome Sanger Institute for the COVID-19 Genomics UK (COG-UK) Consortium                                                                                                                                                                                                                                                                                               | Jacquelyn Wynn, Mairead Hyland, The Lighthouse Lab in Alderley Park and Alex Alderton, Roberto Amato, Sonia Goncalves, Ewan Harrison, David K. Jackson, Ian Johnston, Dominic Kwiatkowski, Cordelia Langford, John Sillitoe on behalf of the Wellcome Sanger Institute COVID-19 Surveillance Team                                                                                                                                                                      |
| EPI_ISL_721718                                                                                                                                                                                                                                                                                                                                                                                                                                                                                                                                                                                                                                                                                                                                                                                                                                                                                                                 | Viollier AG                                                                                                                                                           | Department of Biosystems Science and Engineering, ETH Zürich                                                                                                                                                                                                                                                                                                             | Christian Beisel                                                                                                                                                                                                                                                                                                                                                                                                                                                       |
| EPI_ISL_721987, EPI_ISL_722017                                                                                                                                                                                                                                                                                                                                                                                                                                                                                                                                                                                                                                                                                                                                                                                                                                                                                                 | Hospital das Clinicas Universidade de São Paulo Medical School                                                                                                        | Laboratório de Parasitologia Médica - Instituto de Medicina Tropical - Universidade de São Paulo                                                                                                                                                                                                                                                                         | Brazil-UK Centre for Arbovirus Discovery Diagnosis Genomics and Epidemiology (CADDE) Genomic Network - Instituto de Medicina Tropical                                                                                                                                                                                                                                                                                                                                  |
| EPI_ISL_723513                                                                                                                                                                                                                                                                                                                                                                                                                                                                                                                                                                                                                                                                                                                                                                                                                                                                                                                 | Virginia Division of Consolidated Laboratory Services (DCLS)                                                                                                          | Virginia Division of Consolidated Laboratory Services (DCLS)                                                                                                                                                                                                                                                                                                             | Virginia DCLS                                                                                                                                                                                                                                                                                                                                                                                                                                                          |
| EPI_ISL_724010                                                                                                                                                                                                                                                                                                                                                                                                                                                                                                                                                                                                                                                                                                                                                                                                                                                                                                                 | Oxford Viroemics, NDM, University of Oxford; Oxford University Hospitals; Basingstoke and North Hampshire Hospital                                                    | COVID-19 Genomics UK (COG-UK) Consortium                                                                                                                                                                                                                                                                                                                                 | Tanya Golubchik, David Bonsall, George Macintyre, Amy Trebes, Mariateresa de Cesare, Catrin Moore, Alex Mobbs, Anita Justice, Robert Shaw, Monique Andersson, Timothy Peto, Emma Wise, Nathan Moore, Jessica Lynch, Nick Cortes, Matilde Mori, Stephen Kidd, David Buck, John Todd, Christophe Fraser                                                                                                                                                                  |
| EPI_ISL_728082, EPI_ISL_728101                                                                                                                                                                                                                                                                                                                                                                                                                                                                                                                                                                                                                                                                                                                                                                                                                                                                                                 | University of Wisconsin-Madison AIDS Vaccine Research Laboratories                                                                                                    | University of Wisconsin-Madison AIDS Vaccine Research Laboratories                                                                                                                                                                                                                                                                                                       | Gage Moreno, Katarina Braun, et al. AIDS Vaccine Research Laboratories                                                                                                                                                                                                                                                                                                                                                                                                 |
| EPI_ISL_730170                                                                                                                                                                                                                                                                                                                                                                                                                                                                                                                                                                                                                                                                                                                                                                                                                                                                                                                 | San Diego County Public Health Laboratory                                                                                                                             | Andersen lab at Scripps Research                                                                                                                                                                                                                                                                                                                                         | SEARCH Alliance San Diego with Tracy Basler, Jovan Shephard, Brett Austin                                                                                                                                                                                                                                                                                                                                                                                              |
| EPI_ISL_731623                                                                                                                                                                                                                                                                                                                                                                                                                                                                                                                                                                                                                                                                                                                                                                                                                                                                                                                 | Lighthouse Lab in Alderley Park                                                                                                                                       | Wellcome Sanger Institute for the COVID-19 Genomics UK (COG-UK) Consortium                                                                                                                                                                                                                                                                                               | Jacquelyn Wynn, Mairead Hyland, The Lighthouse Lab in Alderley Park and Alex Alderton, Roberto Amato, Sonia Goncalves, Ewan Harrison, David K. Jackson, Ian Johnston, Dominic Kwiatkowski, Cordelia Langford, John Sillitoe on behalf of the Wellcome Sanger Institute COVID-19 Surveillance Team                                                                                                                                                                      |
| EPI_ISL_732726                                                                                                                                                                                                                                                                                                                                                                                                                                                                                                                                                                                                                                                                                                                                                                                                                                                                                                                 | New Mexico Department of Health Scientific Laboratory                                                                                                                 | New Mexico Department of Health Scientific Laboratory                                                                                                                                                                                                                                                                                                                    | Ellie Johnson, Anastacia Griego-Fisher, D'Eldra Malone                                                                                                                                                                                                                                                                                                                                                                                                                 |
| EPI_ISL_734288, EPI_ISL_734289, EPI_ISL_734293, EPI_ISL_734294, EPI_ISL_734295, EPI_ISL_734309, EPI_ISL_734314, EPI_ISL_734316, EPI_ISL_734319, EPI_ISL_734321, EPI_ISL_734322, EPI_ISL_734323, EPI_ISL_734324, EPI_ISL_734325, EPI_ISL_734326, EPI_ISL_734327, EPI_ISL_734330, EPI_ISL_734334, EPI_ISL_734335, EPI_ISL_734337, EPI_ISL_734339, EPI_ISL_734340, EPI_ISL_734341, EPI_ISL_734343, EPI_ISL_734345, EPI_ISL_734348, EPI_ISL_734349, EPI_ISL_734350, EPI_ISL_734353, EPI_ISL_734368, EPI_ISL_734369, EPI_ISL_734380, EPI_ISL_734390, EPI_ISL_734392, EPI_ISL_734395, EPI_ISL_734396, EPI_ISL_734397, EPI_ISL_734407, EPI_ISL_734411, EPI_ISL_734412, EPI_ISL_734414, EPI_ISL_734415, EPI_ISL_734420, EPI_ISL_734421, EPI_ISL_734423, EPI_ISL_734424, EPI_ISL_734425, EPI_ISL_734426, EPI_ISL_734428, EPI_ISL_734429, EPI_ISL_734430, EPI_ISL_734436, EPI_ISL_734439, EPI_ISL_734440, EPI_ISL_734441, EPI_ISL_734442 |                                                                                                                                                                       |                                                                                                                                                                                                                                                                                                                                                                          |                                                                                                                                                                                                                                                                                                                                                                                                                                                                        |
| see above                                                                                                                                                                                                                                                                                                                                                                                                                                                                                                                                                                                                                                                                                                                                                                                                                                                                                                                      | Wadsworth Center, New York State Department of Health                                                                                                                 | Wadsworth Center, New York State Department of Health                                                                                                                                                                                                                                                                                                                    | Kirsten St. George, Daryl M. Lamson, Alexis Russel, Jonathan Plitnick, Navjot Singh, John Kelly, Sara Griesemer, Erasmus Schneider, Erica Lasek-Nesselquist                                                                                                                                                                                                                                                                                                            |
| EPI_ISL_734447, EPI_ISL_734451, EPI_ISL_734452, EPI_ISL_734456, EPI_ISL_734458, EPI_ISL_734459, EPI_ISL_734460, EPI_ISL_734462, EPI_ISL_734466, EPI_ISL_734468, EPI_ISL_734469, EPI_ISL_734470, EPI_ISL_734471, EPI_ISL_734475, EPI_ISL_734477                                                                                                                                                                                                                                                                                                                                                                                                                                                                                                                                                                                                                                                                                 | see above                                                                                                                                                             | Wadsworth Center, New York State Department of Health                                                                                                                                                                                                                                                                                                                    | Kirsten St. George, Nathan Tucker, Ryan D. Pfeiffer, Daryl M. Lamson, Alexis Russel, Jonathan Plitnick, Navjot Singh, John Kelly, Sara Griesemer, Erasmus Schneider, Erica Lasek-Nesselquist                                                                                                                                                                                                                                                                           |
| EPI_ISL_735460, EPI_ISL_735471, EPI_ISL_737087                                                                                                                                                                                                                                                                                                                                                                                                                                                                                                                                                                                                                                                                                                                                                                                                                                                                                 | UW Virology Lab                                                                                                                                                       | UW Virology Lab                                                                                                                                                                                                                                                                                                                                                          | Pavitra Roychoudhury, Hong Xie, Lasata Shrestha, Meei-Li Huang, Keith R Jerome, Alexander Greninger                                                                                                                                                                                                                                                                                                                                                                    |
| EPI_ISL_737516, EPI_ISL_737926                                                                                                                                                                                                                                                                                                                                                                                                                                                                                                                                                                                                                                                                                                                                                                                                                                                                                                 | Viollier AG                                                                                                                                                           | Department of Biosystems Science and Engineering, ETH Zürich                                                                                                                                                                                                                                                                                                             | Chaoran Chen, Sarah Nadeau, Catharine Aquino, Ivan Topolsky, Philipp Jablonski, Lara Fuhrmann, David Dreifuss, Katharina Jahn, Andrea Cabral de Gouvea, Maria Domenica Moccia, Simon Grüter, Timothy Sykes, Lennart Opitz, Griffin White, Laura Neff, Doris Popovic, Andrea Patrignani, Jay Tracy, Ralph Schlapbach, Christiane Beckmann, Maurice Redondo, Olivier Kobel, Christoph Noppen, Sophie Seidel, Noemie Santamaría de Souza, Niko Beerewinkel, Tanja Stadler |
| EPI_ISL_738507                                                                                                                                                                                                                                                                                                                                                                                                                                                                                                                                                                                                                                                                                                                                                                                                                                                                                                                 | Orange County Public Health Lab                                                                                                                                       | Chan-Zuckerberg Biohub                                                                                                                                                                                                                                                                                                                                                   | CZB Ciliahub Consortium                                                                                                                                                                                                                                                                                                                                                                                                                                                |
| EPI_ISL_738591                                                                                                                                                                                                                                                                                                                                                                                                                                                                                                                                                                                                                                                                                                                                                                                                                                                                                                                 | Renegade                                                                                                                                                              | Chan-Zuckerberg Biohub                                                                                                                                                                                                                                                                                                                                                   | CZB Ciliahub Consortium                                                                                                                                                                                                                                                                                                                                                                                                                                                |
| EPI_ISL_738679                                                                                                                                                                                                                                                                                                                                                                                                                                                                                                                                                                                                                                                                                                                                                                                                                                                                                                                 | Alameda County Public Health Lab                                                                                                                                      | Chan-Zuckerberg Biohub                                                                                                                                                                                                                                                                                                                                                   | CZB Ciliahub Consortium                                                                                                                                                                                                                                                                                                                                                                                                                                                |
| EPI_ISL_738771                                                                                                                                                                                                                                                                                                                                                                                                                                                                                                                                                                                                                                                                                                                                                                                                                                                                                                                 | Santa Clara County Public Health Laboratory                                                                                                                           | Chan-Zuckerberg Biohub                                                                                                                                                                                                                                                                                                                                                   | CZB Ciliahub Consortium                                                                                                                                                                                                                                                                                                                                                                                                                                                |
| EPI_ISL_738785                                                                                                                                                                                                                                                                                                                                                                                                                                                                                                                                                                                                                                                                                                                                                                                                                                                                                                                 | Humboldt County Public Health Laboratory                                                                                                                              | Chan-Zuckerberg Biohub                                                                                                                                                                                                                                                                                                                                                   | CZB Ciliahub Consortium                                                                                                                                                                                                                                                                                                                                                                                                                                                |
| EPI_ISL_738974                                                                                                                                                                                                                                                                                                                                                                                                                                                                                                                                                                                                                                                                                                                                                                                                                                                                                                                 | Alameda County Public Health Lab                                                                                                                                      | Chan-Zuckerberg Biohub                                                                                                                                                                                                                                                                                                                                                   | CZB Ciliahub Consortium                                                                                                                                                                                                                                                                                                                                                                                                                                                |
| EPI_ISL_739011                                                                                                                                                                                                                                                                                                                                                                                                                                                                                                                                                                                                                                                                                                                                                                                                                                                                                                                 | Humboldt County Public Health Laboratory                                                                                                                              | Chan-Zuckerberg Biohub                                                                                                                                                                                                                                                                                                                                                   | CZB Ciliahub Consortium                                                                                                                                                                                                                                                                                                                                                                                                                                                |

|                                                                                                                                                                                                                                                                                                                                                                                                                                                                                                                                                                                                                                                                                                                                                                                                                                                                                                                                                                                                                                                                                                                                                                                                                                                                                                                                                                                                                                                                |                                                                        |                                                                                                                            |                                                                                                                                                                                                                                                                                                                                        |
|----------------------------------------------------------------------------------------------------------------------------------------------------------------------------------------------------------------------------------------------------------------------------------------------------------------------------------------------------------------------------------------------------------------------------------------------------------------------------------------------------------------------------------------------------------------------------------------------------------------------------------------------------------------------------------------------------------------------------------------------------------------------------------------------------------------------------------------------------------------------------------------------------------------------------------------------------------------------------------------------------------------------------------------------------------------------------------------------------------------------------------------------------------------------------------------------------------------------------------------------------------------------------------------------------------------------------------------------------------------------------------------------------------------------------------------------------------------|------------------------------------------------------------------------|----------------------------------------------------------------------------------------------------------------------------|----------------------------------------------------------------------------------------------------------------------------------------------------------------------------------------------------------------------------------------------------------------------------------------------------------------------------------------|
| EPI_ISL_739075, EPI_ISL_739280                                                                                                                                                                                                                                                                                                                                                                                                                                                                                                                                                                                                                                                                                                                                                                                                                                                                                                                                                                                                                                                                                                                                                                                                                                                                                                                                                                                                                                 | Alameda County Public Health Lab                                       | Chan-Zuckerberg Biohub                                                                                                     | CZB Ciliahub Consortium                                                                                                                                                                                                                                                                                                                |
| EPI_ISL_739393                                                                                                                                                                                                                                                                                                                                                                                                                                                                                                                                                                                                                                                                                                                                                                                                                                                                                                                                                                                                                                                                                                                                                                                                                                                                                                                                                                                                                                                 | Madera County Department of Public Health                              | Chan-Zuckerberg Biohub                                                                                                     | CZB Ciliahub Consortium                                                                                                                                                                                                                                                                                                                |
| EPI_ISL_739406, EPI_ISL_739518                                                                                                                                                                                                                                                                                                                                                                                                                                                                                                                                                                                                                                                                                                                                                                                                                                                                                                                                                                                                                                                                                                                                                                                                                                                                                                                                                                                                                                 | Alameda County Public Health Lab                                       | Chan-Zuckerberg Biohub                                                                                                     | CZB Ciliahub Consortium                                                                                                                                                                                                                                                                                                                |
| EPI_ISL_739609                                                                                                                                                                                                                                                                                                                                                                                                                                                                                                                                                                                                                                                                                                                                                                                                                                                                                                                                                                                                                                                                                                                                                                                                                                                                                                                                                                                                                                                 | Orange County Public Health Lab                                        | Chan-Zuckerberg Biohub                                                                                                     | CZB Ciliahub Consortium                                                                                                                                                                                                                                                                                                                |
| EPI_ISL_739613                                                                                                                                                                                                                                                                                                                                                                                                                                                                                                                                                                                                                                                                                                                                                                                                                                                                                                                                                                                                                                                                                                                                                                                                                                                                                                                                                                                                                                                 | UCSF Clinical Microbiology Laboratory                                  | Chan-Zuckerberg Biohub                                                                                                     | CZB Ciliahub Consortium                                                                                                                                                                                                                                                                                                                |
| EPI_ISL_745414, EPI_ISL_745417                                                                                                                                                                                                                                                                                                                                                                                                                                                                                                                                                                                                                                                                                                                                                                                                                                                                                                                                                                                                                                                                                                                                                                                                                                                                                                                                                                                                                                 | DOHMH Jamaica                                                          | New York City Public Health Laboratory                                                                                     | Jade Wang, et al.                                                                                                                                                                                                                                                                                                                      |
| EPI_ISL_745452                                                                                                                                                                                                                                                                                                                                                                                                                                                                                                                                                                                                                                                                                                                                                                                                                                                                                                                                                                                                                                                                                                                                                                                                                                                                                                                                                                                                                                                 | DOHMH Crown Heights                                                    | New York City Public Health Laboratory                                                                                     | Jade Wang, et al.                                                                                                                                                                                                                                                                                                                      |
| EPI_ISL_745697, EPI_ISL_745779, EPI_ISL_745781, EPI_ISL_745786, EPI_ISL_745826, EPI_ISL_745905, EPI_ISL_745921, EPI_ISL_745927, EPI_ISL_745932, EPI_ISL_745956, EPI_ISL_745966, EPI_ISL_746031, EPI_ISL_746052, EPI_ISL_746163, EPI_ISL_746238, EPI_ISL_746263, EPI_ISL_746280                                                                                                                                                                                                                                                                                                                                                                                                                                                                                                                                                                                                                                                                                                                                                                                                                                                                                                                                                                                                                                                                                                                                                                                 |                                                                        |                                                                                                                            |                                                                                                                                                                                                                                                                                                                                        |
| see above                                                                                                                                                                                                                                                                                                                                                                                                                                                                                                                                                                                                                                                                                                                                                                                                                                                                                                                                                                                                                                                                                                                                                                                                                                                                                                                                                                                                                                                      | Ginkgo Bioworks Clinical Laboratory                                    | Utah Public Health Laboratory                                                                                              | Erin L. Young, Kelly Oakeson, Tara Gallagher, Michael T. Pyne, E. Susan Slechta, Melanie A. Mallory, Jeffrey B. Stevenson, Salika M. Shakir, David R. Hillyard, Malaika McKenzie-Bennett, James McGann, Jim Griffin, Keith Robison, Alex Plock, Becky Schilling, Martha Pierson, Rebecca Littlefield, Michelle Spencer, Birgitte Simen |
| EPI_ISL_746536, EPI_ISL_746568, EPI_ISL_746632                                                                                                                                                                                                                                                                                                                                                                                                                                                                                                                                                                                                                                                                                                                                                                                                                                                                                                                                                                                                                                                                                                                                                                                                                                                                                                                                                                                                                 | Genetica Molecular and Subdepartamento de Virologia ISP Chile          | Instituto de Salud Publica de Chile                                                                                        | Javier Tognarelli, Barbara Parra, Loredana Arata, Jaime Lagos, Gisselle Barra, Patricia Bustos, Rodrigo Fasce, Andres Castillo, Jorge Fernandez                                                                                                                                                                                        |
| EPI_ISL_746885                                                                                                                                                                                                                                                                                                                                                                                                                                                                                                                                                                                                                                                                                                                                                                                                                                                                                                                                                                                                                                                                                                                                                                                                                                                                                                                                                                                                                                                 | Utah Public Health Laboratory                                          | Utah Public Health Laboratory                                                                                              | Erin Young, Kelly Oakeson, Tara Gallagher                                                                                                                                                                                                                                                                                              |
| EPI_ISL_747040, EPI_ISL_747050, EPI_ISL_747140, EPI_ISL_747146, EPI_ISL_747151, EPI_ISL_747154                                                                                                                                                                                                                                                                                                                                                                                                                                                                                                                                                                                                                                                                                                                                                                                                                                                                                                                                                                                                                                                                                                                                                                                                                                                                                                                                                                 | Respiratory Viruses Branch, Centers for Disease Control and Prevention | Respiratory Viruses Branch, Centers for Disease Control and Prevention                                                     | Queen,K., Li,Y., Tao,Y., Uehara,A., Montmayeur,A., Paden,C.R., Cook,P.W., Marine,R., Sheth,M., Wang,H., Lee,J., Tong,S.                                                                                                                                                                                                                |
| EPI_ISL_751628                                                                                                                                                                                                                                                                                                                                                                                                                                                                                                                                                                                                                                                                                                                                                                                                                                                                                                                                                                                                                                                                                                                                                                                                                                                                                                                                                                                                                                                 | MD DOH Laboratories Administration                                     | Genomics and Discovery, Respiratory Viruses Branch, Division of Viral Diseases, Centers for Disease Control and Prevention | Krista Queen, Yan Li, Ying Tao, Jing Zhang, Anna Uehara, Anna Montmayeur, Clinton R. Paden, Peter W. Cook,Rachel Marine, Mili Sheth, Haibin Wang, Justin Lee, Suxiang Tong                                                                                                                                                             |
| EPI_ISL_751651                                                                                                                                                                                                                                                                                                                                                                                                                                                                                                                                                                                                                                                                                                                                                                                                                                                                                                                                                                                                                                                                                                                                                                                                                                                                                                                                                                                                                                                 | HI Dept. of Health, State Laboratories Division                        | Genomics and Discovery, Respiratory Viruses Branch, Division of Viral Diseases, Centers for Disease Control and Prevention | Krista Queen, Yan Li, Ying Tao, Jing Zhang, Anna Uehara, Anna Montmayeur, Clinton R. Paden, Peter W. Cook,Rachel Marine, Mili Sheth, Haibin Wang, Justin Lee, Suxiang Tong                                                                                                                                                             |
| EPI_ISL_751679                                                                                                                                                                                                                                                                                                                                                                                                                                                                                                                                                                                                                                                                                                                                                                                                                                                                                                                                                                                                                                                                                                                                                                                                                                                                                                                                                                                                                                                 | MS Public Health Laboratory                                            | Genomics and Discovery, Respiratory Viruses Branch, Division of Viral Diseases, Centers for Disease Control and Prevention | Krista Queen, Yan Li, Ying Tao, Jing Zhang, Anna Uehara, Anna Montmayeur, Clinton R. Paden, Peter W. Cook,Rachel Marine, Mili Sheth, Haibin Wang, Justin Lee, Suxiang Tong                                                                                                                                                             |
| EPI_ISL_751704                                                                                                                                                                                                                                                                                                                                                                                                                                                                                                                                                                                                                                                                                                                                                                                                                                                                                                                                                                                                                                                                                                                                                                                                                                                                                                                                                                                                                                                 | CO Dept. of Public Health and Environment, Lab Services Division       | Genomics and Discovery, Respiratory Viruses Branch, Division of Viral Diseases, Centers for Disease Control and Prevention | Krista Queen, Yan Li, Ying Tao, Jing Zhang, Anna Uehara, Anna Montmayeur, Clinton R. Paden, Peter W. Cook,Rachel Marine, Mili Sheth, Haibin Wang, Justin Lee, Suxiang Tong                                                                                                                                                             |
| EPI_ISL_751706                                                                                                                                                                                                                                                                                                                                                                                                                                                                                                                                                                                                                                                                                                                                                                                                                                                                                                                                                                                                                                                                                                                                                                                                                                                                                                                                                                                                                                                 | CT-Dr. Katherine A. Kelley State Public Health Lab                     | Genomics and Discovery, Respiratory Viruses Branch, Division of Viral Diseases, Centers for Disease Control and Prevention | Krista Queen, Yan Li, Ying Tao, Jing Zhang, Anna Uehara, Anna Montmayeur, Clinton R. Paden, Peter W. Cook,Rachel Marine, Mili Sheth, Haibin Wang, Justin Lee, Suxiang Tong                                                                                                                                                             |
| EPI_ISL_751773                                                                                                                                                                                                                                                                                                                                                                                                                                                                                                                                                                                                                                                                                                                                                                                                                                                                                                                                                                                                                                                                                                                                                                                                                                                                                                                                                                                                                                                 | NJ Public Health and Environmental Laboratories                        | Genomics and Discovery, Respiratory Viruses Branch, Division of Viral Diseases, Centers for Disease Control and Prevention | Krista Queen, Yan Li, Ying Tao, Jing Zhang, Anna Uehara, Anna Montmayeur, Clinton R. Paden, Peter W. Cook,Rachel Marine, Mili Sheth, Haibin Wang, Justin Lee, Suxiang Tong                                                                                                                                                             |
| EPI_ISL_751817, EPI_ISL_751824, EPI_ISL_751825                                                                                                                                                                                                                                                                                                                                                                                                                                                                                                                                                                                                                                                                                                                                                                                                                                                                                                                                                                                                                                                                                                                                                                                                                                                                                                                                                                                                                 | New Mexico Department of Health Scientific Laboratory                  | New Mexico Department of Health Scientific Laboratory                                                                      | D'eldra Malone, Ellie Johnson, Anastacia Griego-Fisher                                                                                                                                                                                                                                                                                 |
| EPI_ISL_752696, EPI_ISL_752710, EPI_ISL_752719, EPI_ISL_752723, EPI_ISL_752731, EPI_ISL_752732, EPI_ISL_752734, EPI_ISL_752737, EPI_ISL_752741, EPI_ISL_752743, EPI_ISL_752765, EPI_ISL_752766, EPI_ISL_752784, EPI_ISL_752816, EPI_ISL_752818, EPI_ISL_752825, EPI_ISL_752829, EPI_ISL_752842, EPI_ISL_752846, EPI_ISL_752849, EPI_ISL_752851, EPI_ISL_752862, EPI_ISL_752883, EPI_ISL_752884, EPI_ISL_752887, EPI_ISL_752889, EPI_ISL_752900, EPI_ISL_752912, EPI_ISL_752927, EPI_ISL_752930, EPI_ISL_752932, EPI_ISL_752938, EPI_ISL_752945, EPI_ISL_752946, EPI_ISL_752947, EPI_ISL_752948, EPI_ISL_752955, EPI_ISL_752956, EPI_ISL_752968, EPI_ISL_752971, EPI_ISL_752975, EPI_ISL_752976, EPI_ISL_752977, EPI_ISL_752979, EPI_ISL_752980, EPI_ISL_752981, EPI_ISL_752993, EPI_ISL_752994, EPI_ISL_752996, EPI_ISL_752997, EPI_ISL_752999, EPI_ISL_753001, EPI_ISL_753007, EPI_ISL_753008, EPI_ISL_753011, EPI_ISL_753012, EPI_ISL_753013, EPI_ISL_753023, EPI_ISL_753027, EPI_ISL_753030, EPI_ISL_753033, EPI_ISL_753041, EPI_ISL_753044, EPI_ISL_753052, EPI_ISL_753053, EPI_ISL_753056, EPI_ISL_753060, EPI_ISL_753062, EPI_ISL_753074, EPI_ISL_753075, EPI_ISL_753077, EPI_ISL_753079, EPI_ISL_753081, EPI_ISL_753088, EPI_ISL_753091, EPI_ISL_753096, EPI_ISL_753102, EPI_ISL_753103, EPI_ISL_753111, EPI_ISL_753121, EPI_ISL_753126, EPI_ISL_753148, EPI_ISL_753150, EPI_ISL_753229, EPI_ISL_753231, EPI_ISL_753232, EPI_ISL_753246, EPI_ISL_753258 |                                                                        |                                                                                                                            |                                                                                                                                                                                                                                                                                                                                        |
| see above                                                                                                                                                                                                                                                                                                                                                                                                                                                                                                                                                                                                                                                                                                                                                                                                                                                                                                                                                                                                                                                                                                                                                                                                                                                                                                                                                                                                                                                      | State Laboratories Division, Hawaii State Department of Health         | State Laboratories Division, Hawaii State Department of Health                                                             | Pamela O'Brien, Sabrina Diemert, Drew Kuwazaki, Razvan Sultana, Edward Desmond                                                                                                                                                                                                                                                         |
| EPI_ISL_753451, EPI_ISL_753471, EPI_ISL_753475, EPI_ISL_753604                                                                                                                                                                                                                                                                                                                                                                                                                                                                                                                                                                                                                                                                                                                                                                                                                                                                                                                                                                                                                                                                                                                                                                                                                                                                                                                                                                                                 | Clinical virology Laboratory, Children's Hospital Los Angeles          | Center for Personalized Medicine, Children's Hospital Los Angeles                                                          | Gai et al                                                                                                                                                                                                                                                                                                                              |
| EPI_ISL_754394, EPI_ISL_754395, EPI_ISL_754397, EPI_ISL_754405, EPI_ISL_754406, EPI_ISL_754415, EPI_ISL_754416, EPI_ISL_754417, EPI_ISL_754419, EPI_ISL_754428, EPI_ISL_754437, EPI_ISL_754440, EPI_ISL_754441, EPI_ISL_754449, EPI_ISL_754451, EPI_ISL_754451, EPI_ISL_754453, EPI_ISL_754458, EPI_ISL_754460, EPI_ISL_754469, EPI_ISL_754470, EPI_ISL_754474, EPI_ISL_754483, EPI_ISL_754485, EPI_ISL_754488, EPI_ISL_754491, EPI_ISL_754505, EPI_ISL_754507, EPI_ISL_754509, EPI_ISL_754510, EPI_ISL_754511, EPI_ISL_754512, EPI_ISL_754520, EPI_ISL_754521, EPI_ISL_754522, EPI_ISL_754524, EPI_ISL_754531, EPI_ISL_754532, EPI_ISL_754533, EPI_ISL_754535, EPI_ISL_754538, EPI_ISL_754541, EPI_ISL_754542, EPI_ISL_754547, EPI_ISL_754555, EPI_ISL_754560, EPI_ISL_754563, EPI_ISL_754565, EPI_ISL_754569, EPI_ISL_754571, EPI_ISL_754573, EPI_ISL_754576, EPI_ISL_754577, EPI_ISL_754578, EPI_ISL_754579, EPI_ISL_754580, EPI_ISL_754587, EPI_ISL_754592, EPI_ISL_754593, EPI_ISL_754594, EPI_ISL_754597, EPI_ISL_754598, EPI_ISL_754599, EPI_ISL_754602, EPI_ISL_754605, EPI_ISL_754606, EPI_ISL_754607, EPI_ISL_754609, EPI_ISL_754610, EPI_ISL_754614, EPI_ISL_754617, EPI_ISL_754618                                                                                                                                                                                                                                                                 |                                                                        |                                                                                                                            |                                                                                                                                                                                                                                                                                                                                        |
| see above                                                                                                                                                                                                                                                                                                                                                                                                                                                                                                                                                                                                                                                                                                                                                                                                                                                                                                                                                                                                                                                                                                                                                                                                                                                                                                                                                                                                                                                      | Wadsworth Center, New York State Department.of Health                  | Wadsworth Center, New York State Department.of Health                                                                      | Kirsten St. George, Daryl M. Lamson, Alexis Russel, Matthew Shudt, Melissa A Leisner, Jonathan Plitnick, Navjot Singh, John Kelly, Sara Griesemer, Erasmus Schneider, Erica Lasek-Nesselquist                                                                                                                                          |
| EPI_ISL_754619                                                                                                                                                                                                                                                                                                                                                                                                                                                                                                                                                                                                                                                                                                                                                                                                                                                                                                                                                                                                                                                                                                                                                                                                                                                                                                                                                                                                                                                 | University of Wisconsin-Madison AIDS Vaccine Research Laboratories     | University of Wisconsin-Madison AIDS Vaccine Research Laboratories                                                         | Gage Moreno, Katarina Braun, et al. AIDS Vaccine Research Laboratories                                                                                                                                                                                                                                                                 |
| EPI_ISL_754725, EPI_ISL_754726, EPI_ISL_754789, EPI_ISL_754790, EPI_ISL_754795                                                                                                                                                                                                                                                                                                                                                                                                                                                                                                                                                                                                                                                                                                                                                                                                                                                                                                                                                                                                                                                                                                                                                                                                                                                                                                                                                                                 | Wadsworth Center, New York State Department.of Health                  | Wadsworth Center, New York State Department.of Health                                                                      | Kirsten St. George, Daryl M. Lamson, Alexis Russel, Matthew Shudt, Melissa A Leisner, Jonathan Plitnick, Navjot Singh, John Kelly, Sara Griesemer, Erasmus Schneider, Erica Lasek-Nesselquist                                                                                                                                          |
| EPI_ISL_754895, EPI_ISL_754896                                                                                                                                                                                                                                                                                                                                                                                                                                                                                                                                                                                                                                                                                                                                                                                                                                                                                                                                                                                                                                                                                                                                                                                                                                                                                                                                                                                                                                 | Innovative Genomics Institute, UC Berkeley                             | Innovative Genomics Institute, UC Berkeley                                                                                 | Stacia Wyman, Haridha Shivram, Phil Frankino, Liana Lareau, Shana McDevitt, Justin Choi                                                                                                                                                                                                                                                |
| EPI_ISL_754917, EPI_ISL_754926, EPI_ISL_754938, EPI_ISL_754951                                                                                                                                                                                                                                                                                                                                                                                                                                                                                                                                                                                                                                                                                                                                                                                                                                                                                                                                                                                                                                                                                                                                                                                                                                                                                                                                                                                                 | California Department of Public Health                                 | California Department of Public Health                                                                                     | CDPH IDLB COVIDNet                                                                                                                                                                                                                                                                                                                     |
| EPI_ISL_755150, EPI_ISL_755169                                                                                                                                                                                                                                                                                                                                                                                                                                                                                                                                                                                                                                                                                                                                                                                                                                                                                                                                                                                                                                                                                                                                                                                                                                                                                                                                                                                                                                 | UCSD EXCITE lab                                                        | Andersen lab at Scripps Research                                                                                           | SEARCH Alliance San Diego                                                                                                                                                                                                                                                                                                              |
| EPI_ISL_755342, EPI_ISL_755369, EPI_ISL_755437, EPI_ISL_755498                                                                                                                                                                                                                                                                                                                                                                                                                                                                                                                                                                                                                                                                                                                                                                                                                                                                                                                                                                                                                                                                                                                                                                                                                                                                                                                                                                                                 | Maine Health and Environmental Testing Laboratory                      | Tewhey Lab, The Jackson Laboratory                                                                                         | Matluk,N., Dewey,H., Iosue,F., Barter,M., Lynch,R., Munger,H. and Tewhey,R.                                                                                                                                                                                                                                                            |
| EPI_ISL_755895, EPI_ISL_755896, EPI_ISL_755926                                                                                                                                                                                                                                                                                                                                                                                                                                                                                                                                                                                                                                                                                                                                                                                                                                                                                                                                                                                                                                                                                                                                                                                                                                                                                                                                                                                                                 | Toronto Invasive Bacterial Diseases Network                            | McMaster University                                                                                                        | Allison McGeer, Patryk Aftanas, Hooman Derakhshani, Angel Li, Kuganya Nirmalarajah, Emily Panousis, Ahmed Draia, Jalees Nasir, Michael Surette, Samira Mubareka, Andrew G. McArthur                                                                                                                                                    |
| EPI_ISL_756225, EPI_ISL_756226, EPI_ISL_756236                                                                                                                                                                                                                                                                                                                                                                                                                                                                                                                                                                                                                                                                                                                                                                                                                                                                                                                                                                                                                                                                                                                                                                                                                                                                                                                                                                                                                 | UW Virology Lab                                                        | UW Virology Lab                                                                                                            | Pavitra Roychoudhury, Hong Xie, Lasata Shrestha, Meei-Li Huang, Keith R Jerome, Alexander Greninger                                                                                                                                                                                                                                    |
| EPI_ISL_756278, EPI_ISL_756279                                                                                                                                                                                                                                                                                                                                                                                                                                                                                                                                                                                                                                                                                                                                                                                                                                                                                                                                                                                                                                                                                                                                                                                                                                                                                                                                                                                                                                 | State Laboratories Division, Hawaii State Department of Health         | State Laboratories Division, Hawaii State Department of Health                                                             | Pamela O'Brien, Sabrina Diemert, Drew Kuwazaki, Razvan Sultana, Edward Desmond                                                                                                                                                                                                                                                         |
| EPI_ISL_765493, EPI_ISL_765494, EPI_ISL_765495                                                                                                                                                                                                                                                                                                                                                                                                                                                                                                                                                                                                                                                                                                                                                                                                                                                                                                                                                                                                                                                                                                                                                                                                                                                                                                                                                                                                                 | MONTEFIORE MEDICAL CENTER LABORATORIES                                 | Wadsworth Center, New York State Department.of Health                                                                      | Kirsten St. George, Daryl M. Lamson, Alexis Russel, Matthew Shudt, Melissa A Leisner, Jonathan Plitnick, Navjot Singh, John Kelly, Sara Griesemer, Erasmus Schneider, Erica Lasek-Nesselquist                                                                                                                                          |

|                                                                                                                                                                                                                                                                                                                                                                   |                                                                                                                                                                                                                                                         |                                                                                                                                                   |                                                                                                                                                                                                                                                                                                                                                                                                                                                                                                                                                                                                                                                                       |
|-------------------------------------------------------------------------------------------------------------------------------------------------------------------------------------------------------------------------------------------------------------------------------------------------------------------------------------------------------------------|---------------------------------------------------------------------------------------------------------------------------------------------------------------------------------------------------------------------------------------------------------|---------------------------------------------------------------------------------------------------------------------------------------------------|-----------------------------------------------------------------------------------------------------------------------------------------------------------------------------------------------------------------------------------------------------------------------------------------------------------------------------------------------------------------------------------------------------------------------------------------------------------------------------------------------------------------------------------------------------------------------------------------------------------------------------------------------------------------------|
| EPI_ISL_765499, EPI_ISL_765500,<br>EPI_ISL_765501, EPI_ISL_765502,<br>EPI_ISL_765504, EPI_ISL_765508<br><br>EPI_ISL_765523, EPI_ISL_765527                                                                                                                                                                                                                        | Wadsworth Center, New York State Department.of Health<br><br>SARATOGA HOSPITAL LABORATORY                                                                                                                                                               | Wadsworth Center, New York State Department.of Health<br><br>Wadsworth Center, New York State Department.of Health                                | Kirsten St. George, Daryl M. Lamson, Alexis Russel, Matthew Shudt, Melissa A Leisner, Jonathan Pitnick, Navjot Singh, John Kelly, Sara Griesemer, Erasmus Schneider, Erica Lasek-Nesselquist<br><br>Kirsten St. George, Daryl M. Lamson, Alexis Russel, Matthew Shudt, Melissa A Leisner, Jonathan Pitnick, Navjot Singh, John Kelly, Sara Griesemer, Erasmus Schneider, Erica Lasek-Nesselquist                                                                                                                                                                                                                                                                      |
| EPI_ISL_765530, EPI_ISL_765531,<br>EPI_ISL_765534, EPI_ISL_765536,<br>EPI_ISL_765539, EPI_ISL_765544,<br>EPI_ISL_765546, EPI_ISL_765557<br><br>EPI_ISL_765781, EPI_ISL_765886                                                                                                                                                                                     | MONTEFIORE MEDICAL CENTER LABORATORIES<br><br>Massachusetts General Hospital                                                                                                                                                                            | Wadsworth Center, New York State Department.of Health<br><br>Infectious Disease Program, Broad Institute of Harvard and MIT                       | Kirsten St. George, Daryl M. Lamson, Alexis Russel, Matthew Shudt, Melissa A Leisner, Jonathan Pitnick, Navjot Singh, John Kelly, Sara Griesemer, Erasmus Schneider, Erica Lasek-Nesselquist<br><br>Lemieux,J.E., Siddle,K.J., Shaw,B., Adams,G., Pierce,V., Turbett,S., Anahtar,M., Branda,J., Slater,D., Harris,J., Lin,A.E., Gladden-Young,A., Lagerborg,K., Rudy,M., DeRuff,K., Carter,A., Normandin,E., Bauer,M., Reilly,S., Tomkins-Tinch,C., Loreth,C., Chaluvadi,S., Neumann,A., Cusick,C., Chapman,S.B., Gnirke,A., Flowers,K., Cerrato,F., Birren,B.W., Gallagher,G., Smole,S., Park,D.J., MacInnis,B.L., Ryan,E., LaRoque,R., Rosenberg,E. and Sabeti,P.C. |
| EPI_ISL_765957                                                                                                                                                                                                                                                                                                                                                    | Worobey Lab, Department of Ecology and Evolutionary Biology, University of Arizona                                                                                                                                                                      | Worobey Lab, Department of Ecology and Evolutionary Biology, University of Arizona                                                                | Brendan Larsen, Grace Quirk, Thomas Watts, David Baltrus, Michael Worobey                                                                                                                                                                                                                                                                                                                                                                                                                                                                                                                                                                                             |
| EPI_ISL_765992                                                                                                                                                                                                                                                                                                                                                    | UCLA Clinical Micro Lab                                                                                                                                                                                                                                 | Los Angeles County PHL                                                                                                                            | P. Hemarajata et al.                                                                                                                                                                                                                                                                                                                                                                                                                                                                                                                                                                                                                                                  |
| EPI_ISL_766645                                                                                                                                                                                                                                                                                                                                                    | Barnakuten                                                                                                                                                                                                                                              | The Public Health Agency of Sweden                                                                                                                | Department of Microbiology, The Public Health Agency of Sweden                                                                                                                                                                                                                                                                                                                                                                                                                                                                                                                                                                                                        |
| EPI_ISL_766891                                                                                                                                                                                                                                                                                                                                                    | New Mexico Department of Health Scientific Laboratory                                                                                                                                                                                                   | New Mexico Department of Health Scientific Laboratory                                                                                             | D'eldra Malone, Ellie Johnson, Anastacia Griego-Fisher                                                                                                                                                                                                                                                                                                                                                                                                                                                                                                                                                                                                                |
| EPI_ISL_766978, EPI_ISL_766992,<br>EPI_ISL_766996, EPI_ISL_766997,<br>EPI_ISL_767012                                                                                                                                                                                                                                                                              | Delaware Public Health Laboratory                                                                                                                                                                                                                       | Delaware Public Health Laboratory                                                                                                                 | Gregory Hovan                                                                                                                                                                                                                                                                                                                                                                                                                                                                                                                                                                                                                                                         |
| EPI_ISL_767058                                                                                                                                                                                                                                                                                                                                                    | New Mexico Department of Health Scientific Laboratory                                                                                                                                                                                                   | New Mexico Department of Health Scientific Laboratory                                                                                             | D'eldra Malone, Ellie Johnson, Anastacia Griego-Fisher                                                                                                                                                                                                                                                                                                                                                                                                                                                                                                                                                                                                                |
| EPI_ISL_767418, EPI_ISL_767422, EPI_ISL_767438,<br>see above                                                                                                                                                                                                                                                                                                      | EPI_ISL_767447, EPI_ISL_767454, EPI_ISL_767460, EPI_ISL_767471, EPI_ISL_767476, EPI_ISL_767477, EPI_ISL_767504, EPI_ISL_767507, EPI_ISL_767521, EPI_ISL_767522, EPI_ISL_767532, EPI_ISL_767535<br>Wadsworth Center, New York State Department.of Health | Wadsworth Center, New York State Department.of Health                                                                                             | Kirsten St. George, Daryl M. Lamson, Alexis Russel, Matthew Shudt, Melissa A Leisner, Jonathan Pitnick, Navjot Singh, John Kelly, Sara Griesemer, Erasmus Schneider, Erica Lasek-Nesselquist                                                                                                                                                                                                                                                                                                                                                                                                                                                                          |
| EPI_ISL_767542, EPI_ISL_767552,<br>EPI_ISL_767554, EPI_ISL_767560,<br>EPI_ISL_767566, EPI_ISL_767577<br><br>EPI_ISL_767582, EPI_ISL_767584                                                                                                                                                                                                                        | URMC LABS<br><br>WHITE PLAINS HOSPITAL CENTER LABORATORY                                                                                                                                                                                                | Wadsworth Center, New York State Department.of Health<br><br>Wadsworth Center, New York State Department.of Health                                | Kirsten St. George, Daryl M. Lamson, Alexis Russel, Matthew Shudt, Melissa A Leisner, Jonathan Pitnick, Navjot Singh, John Kelly, Sara Griesemer, Erasmus Schneider, Erica Lasek-Nesselquist<br><br>Kirsten St. George, Daryl M. Lamson, Alexis Russel, Matthew Shudt, Melissa A Leisner, Jonathan Pitnick, Navjot Singh, John Kelly, Sara Griesemer, Erasmus Schneider, Erica Lasek-Nesselquist                                                                                                                                                                                                                                                                      |
| EPI_ISL_767599, EPI_ISL_767603,<br>EPI_ISL_767604, EPI_ISL_767607,<br>EPI_ISL_767612                                                                                                                                                                                                                                                                              | SARATOGA HOSPITAL LABORATORY                                                                                                                                                                                                                            | Wadsworth Center, New York State Department.of Health                                                                                             | Kirsten St. George, Daryl M. Lamson, Alexis Russel, Matthew Shudt, Melissa A Leisner, Jonathan Pitnick, Navjot Singh, John Kelly, Sara Griesemer, Erasmus Schneider, Erica Lasek-Nesselquist                                                                                                                                                                                                                                                                                                                                                                                                                                                                          |
| EPI_ISL_767624, EPI_ISL_767627                                                                                                                                                                                                                                                                                                                                    | WHITE PLAINS HOSPITAL CENTER LABORATORY                                                                                                                                                                                                                 | Wadsworth Center, New York State Department.of Health                                                                                             | Kirsten St. George, Daryl M. Lamson, Alexis Russel, Matthew Shudt, Melissa A Leisner, Jonathan Pitnick, Navjot Singh, John Kelly, Sara Griesemer, Erasmus Schneider, Erica Lasek-Nesselquist                                                                                                                                                                                                                                                                                                                                                                                                                                                                          |
| EPI_ISL_767629, EPI_ISL_767630,<br>EPI_ISL_767642, EPI_ISL_767645,<br>EPI_ISL_767646, EPI_ISL_767649,<br>EPI_ISL_767657, EPI_ISL_767658                                                                                                                                                                                                                           | MEMORIAL SLOAN KETTERING CANCER CENTER                                                                                                                                                                                                                  | Wadsworth Center, New York State Department.of Health                                                                                             | Kirsten St. George, Daryl M. Lamson, Alexis Russel, Matthew Shudt, Melissa A Leisner, Jonathan Pitnick, Navjot Singh, John Kelly, Sara Griesemer, Erasmus Schneider, Erica Lasek-Nesselquist                                                                                                                                                                                                                                                                                                                                                                                                                                                                          |
| EPI_ISL_767671, EPI_ISL_767678,<br>EPI_ISL_767680                                                                                                                                                                                                                                                                                                                 | BIO-REFERENCE LABORATORIES                                                                                                                                                                                                                              | Wadsworth Center, New York State Department.of Health                                                                                             | Kirsten St. George, Daryl M. Lamson, Alexis Russel, Matthew Shudt, Melissa A Leisner, Jonathan Pitnick, Navjot Singh, John Kelly, Sara Griesemer, Erasmus Schneider, Erica Lasek-Nesselquist                                                                                                                                                                                                                                                                                                                                                                                                                                                                          |
| EPI_ISL_767682, EPI_ISL_767683, EPI_ISL_767687,<br>see above                                                                                                                                                                                                                                                                                                      | EPI_ISL_767689, EPI_ISL_767692, EPI_ISL_767693, EPI_ISL_767694, EPI_ISL_767697, EPI_ISL_767699, EPI_ISL_767701, EPI_ISL_767702, EPI_ISL_767704, EPI_ISL_767705<br>MEMORIAL SLOAN KETTERING CANCER CENTER                                                | Wadsworth Center, New York State Department.of Health                                                                                             | Kirsten St. George, Daryl M. Lamson, Alexis Russel, Matthew Shudt, Melissa A Leisner, Jonathan Pitnick, Navjot Singh, John Kelly, Sara Griesemer, Erasmus Schneider, Erica Lasek-Nesselquist                                                                                                                                                                                                                                                                                                                                                                                                                                                                          |
| EPI_ISL_767993                                                                                                                                                                                                                                                                                                                                                    | Viollier AG                                                                                                                                                                                                                                             | Department of Biosystems Science and Engineering, ETH Zürich                                                                                      | Chaoran Chen, Sarah Nadeau, Catharine Aquino, Ivan Topolsky, Philipp Jablonski, Lara Fuhrmann, David Dreifuss, Katharina Jahn, Andrea Cabral de Gouvea, Maria Domenica Moccia, Simon Grüter, Timothy Sykes, Lennart Opitz, Griffin White, Laura Neff, Doris Popovic, Andrea Patrignani, Jay Tracy, Ralph Schlapbach, Christiane Beckmann, Maurice Redondo, Olivier Kobel, Christoph Noppen, Sophie Seidel, Noemie Santamaria de Souza, Niko Beerenwinkel, Tanja Stadler                                                                                                                                                                                               |
| EPI_ISL_768384, EPI_ISL_768483                                                                                                                                                                                                                                                                                                                                    | LSUHS Emerging Viral Threat Laboratory                                                                                                                                                                                                                  | Microbial Genome Sequencing Center                                                                                                                | Jeremy P. Kamil, Jennifer L. Carroll, Camille F. Abshire, Maarten Van Diest, Andrew D. Yurochko, Martin J. Sapp, Rona S. Scott, Christopher G. Kevil, Daniel J. Snyder, Vaughn S. Cooper, John A. Vanchiere                                                                                                                                                                                                                                                                                                                                                                                                                                                           |
| EPI_ISL_769817                                                                                                                                                                                                                                                                                                                                                    | Lighthouse Lab in Milton Keynes                                                                                                                                                                                                                         | Wellcome Sanger Institute for the COVID-19 Genomics UK (COG-UK) Consortium                                                                        | The Lighthouse Lab in Milton Keynes and Alex Alderton, Roberto Amato, Sonia Goncalves, Ewan Harrison, David K. Jackson, Ian Johnston, Dominic Kwiatkowski, Cordelia Langford, John Sillitoe on behalf of the Wellcome Sanger Institute COVID-19 Surveillance Team                                                                                                                                                                                                                                                                                                                                                                                                     |
| EPI_ISL_769920, EPI_ISL_769932, EPI_ISL_769943,<br>see above                                                                                                                                                                                                                                                                                                      | EPI_ISL_769946, EPI_ISL_769948, EPI_ISL_769950, EPI_ISL_769951, EPI_ISL_769958, EPI_ISL_769959, EPI_ISL_769965, EPI_ISL_769966, EPI_ISL_769968, EPI_ISL_769969, EPI_ISL_769979, EPI_ISL_769980<br>Albany Medical Center Hospital Clinical Laboratories  | Wadsworth Center, New York State Department.of Health                                                                                             | Kirsten St. George, Daryl M. Lamson, Alexis Russel, Matthew Shudt, Melissa A Leisner, Jonathan Pitnick, Navjot Singh, John Kelly, Sara Griesemer, Erasmus Schneider, Erica Lasek-Nesselquist                                                                                                                                                                                                                                                                                                                                                                                                                                                                          |
| EPI_ISL_770119, EPI_ISL_770127<br>EPI_ISL_770812                                                                                                                                                                                                                                                                                                                  | Wyoming Public Health Laboratory<br>Essentia Health-St. Mary's Medical Center                                                                                                                                                                           | Wyoming Public Health Laboratory<br>Minnesota Department of Health, Public Health Laboratory                                                      | Noah Hull, Taylor Fearing, Lynette Gumbleton, Channing Weber, Ashley Norberg, Bailey Bowcutt, and Wanda Manley<br>Alexandra Lorentz, Jacob Garfin, Matt Plumb, and Xiong Wang                                                                                                                                                                                                                                                                                                                                                                                                                                                                                         |
| EPI_ISL_771161, EPI_ISL_771171, EPI_ISL_771175,<br>EPI_ISL_771180, EPI_ISL_771187, EPI_ISL_771253, EPI_ISL_771257, EPI_ISL_771258, EPI_ISL_771260, EPI_ISL_771282, EPI_ISL_771294, EPI_ISL_771303, EPI_ISL_771306, EPI_ISL_771308, EPI_ISL_771309, EPI_ISL_771310, EPI_ISL_771311, EPI_ISL_771313,<br>EPI_ISL_771324, EPI_ISL_771332, EPI_ISL_771340<br>see above | Colorado Department of Public Health and Environment<br>University Medical Center Hamburg Eppendorf                                                                                                                                                     | Colorado Department of Puplic Health and Environment<br>Heinrich Pette Institute, Leibniz Institute for Experimental Virology                     | Laura Bankers, Molly C. Hetherington-Rauth, Diana Ir, Shannon Ely, Shannon R. Matzinger, Sarah Elizabeth Totten, Emily A. Travanty<br>Alexis Robitaille, Thomas Günther, Johannes Knobloch, Martin Aepfelbacher, Nicole Fischer, Adam Grundhoff                                                                                                                                                                                                                                                                                                                                                                                                                       |
| EPI_ISL_776668, EPI_ISL_776694<br>EPI_ISL_778877, EPI_ISL_778886,<br>EPI_ISL_778907                                                                                                                                                                                                                                                                               | UW Virology Lab<br>Maryland Public Health Laboratory                                                                                                                                                                                                    | UW Virology Lab<br>Maryland Public Health Laboratory                                                                                              | Pavitra Roychoudhury, Hong Xie, Lasata Shrestha, Meei-Li Huang, Keith R Jerome, Alexander Greninger<br>Maryland Department of Health Laboratories Administration                                                                                                                                                                                                                                                                                                                                                                                                                                                                                                      |
| EPI_ISL_779190, EPI_ISL_779192                                                                                                                                                                                                                                                                                                                                    | Laboratorio Estatal de Salud Pública de Nuevo León                                                                                                                                                                                                      | Laboratorio de Infectología Molecular, Departamento de Bioquímica y Medicina Molecular, Facultad de Medicina - Universidad Autónoma de Nuevo León | Karne A. Galán-Huerta, María F. Herrera-Saldivar, Natalia Martínez-Acuña, Sonia A. Lozano-Sepúlveda, Daniel Arellanos-Soto, Ana M. Rivas-Estilla, Samuel Buentello-Wong, Else del Carmen García-García, Gloria A. Jasso-de-la-Peña, Roberto Montes-de-Oca, Consuelo Treviño-Garza, Manuel E. de-la-O-Cavazos                                                                                                                                                                                                                                                                                                                                                          |
| EPI_ISL_779350                                                                                                                                                                                                                                                                                                                                                    | University of Wisconsin-Madison AIDS Vaccine Research Laboratories                                                                                                                                                                                      | University of Wisconsin-Madison AIDS Vaccine Research Laboratories                                                                                | Gage Moreno, Katarina Braun, et al. AIDS Vaccine Research Laboratories                                                                                                                                                                                                                                                                                                                                                                                                                                                                                                                                                                                                |
| EPI_ISL_780047                                                                                                                                                                                                                                                                                                                                                    | Hospital General Universitario Gregorio Marañón                                                                                                                                                                                                         | SeqCOVID-SPAIN consortium/IBV(CSIC)                                                                                                               | Darío García de Viedma, Laura Pérez-Lago, Marta Herranz, Jon Sicilia, Julia Suárez, Pilar Catalán, Patricia Muñoz and SeqCOVID-SPAIN consortium                                                                                                                                                                                                                                                                                                                                                                                                                                                                                                                       |

|                                                                                                                                                                                                                                                                                                                                                                                                                                                                                                                                                                |                                                                    |                                                                           |                                                                                                                                                                                                                                                                                                                                                                                                                                                                                                                                                                                                                                                                                                                                                                                                  |                                                                                                                                                                                                                                           |
|----------------------------------------------------------------------------------------------------------------------------------------------------------------------------------------------------------------------------------------------------------------------------------------------------------------------------------------------------------------------------------------------------------------------------------------------------------------------------------------------------------------------------------------------------------------|--------------------------------------------------------------------|---------------------------------------------------------------------------|--------------------------------------------------------------------------------------------------------------------------------------------------------------------------------------------------------------------------------------------------------------------------------------------------------------------------------------------------------------------------------------------------------------------------------------------------------------------------------------------------------------------------------------------------------------------------------------------------------------------------------------------------------------------------------------------------------------------------------------------------------------------------------------------------|-------------------------------------------------------------------------------------------------------------------------------------------------------------------------------------------------------------------------------------------|
| EPI_ISL_781056, EPI_ISL_783631, EPI_ISL_783708, EPI_ISL_783710, EPI_ISL_783717, EPI_ISL_783757, EPI_ISL_784078, EPI_ISL_784475, EPI_ISL_784816, EPI_ISL_785027, EPI_ISL_785047, EPI_ISL_785071, EPI_ISL_785087, EPI_ISL_785115, EPI_ISL_785137, EPI_ISL_785280, EPI_ISL_785436, EPI_ISL_785797, EPI_ISL_785870, EPI_ISL_785927, EPI_ISL_786477, EPI_ISL_786538, EPI_ISL_786775, EPI_ISL_787408, EPI_ISL_787420, EPI_ISL_787432, EPI_ISL_787692, EPI_ISL_787707, EPI_ISL_787783, EPI_ISL_787969, EPI_ISL_788454, EPI_ISL_788635, EPI_ISL_788776, EPI_ISL_788807 | see above                                                          | Houston Methodist Hospital                                                | Houston Methodist Hospital                                                                                                                                                                                                                                                                                                                                                                                                                                                                                                                                                                                                                                                                                                                                                                       | S. Wesley Long, Randall J. Olsen, Paul A. Christensen, David W. Bernard, James J. Davis, Maulik Shukla, Marcus Nguyen, Matthew Ojeda Saavedra, Prasanti Yerramilli, Layne Pruitt, Sishir Subedi, Heather Hendrickson, and James M. Musser |
| EPI_ISL_788904                                                                                                                                                                                                                                                                                                                                                                                                                                                                                                                                                 | University of Wisconsin-Madison AIDS Vaccine Research Laboratories | University of Wisconsin-Madison AIDS Vaccine Research Laboratories        | Gage Moreno, Katarina Braun, et al. AIDS Vaccine Research Laboratories                                                                                                                                                                                                                                                                                                                                                                                                                                                                                                                                                                                                                                                                                                                           |                                                                                                                                                                                                                                           |
| EPI_ISL_789136, EPI_ISL_789597, EPI_ISL_789715, EPI_ISL_789776, EPI_ISL_789794, EPI_ISL_789903, EPI_ISL_789947, EPI_ISL_790143, EPI_ISL_790149, EPI_ISL_790161, EPI_ISL_790173, EPI_ISL_790269, EPI_ISL_790279, EPI_ISL_790292, EPI_ISL_790300, EPI_ISL_790340, EPI_ISL_790344, EPI_ISL_790355, EPI_ISL_790381, EPI_ISL_790465, EPI_ISL_790479                                                                                                                                                                                                                 | see above                                                          | Houston Methodist Hospital                                                | Houston Methodist Hospital                                                                                                                                                                                                                                                                                                                                                                                                                                                                                                                                                                                                                                                                                                                                                                       | S. Wesley Long, Randall J. Olsen, Paul A. Christensen, David W. Bernard, James J. Davis, Maulik Shukla, Marcus Nguyen, Matthew Ojeda Saavedra, Prasanti Yerramilli, Layne Pruitt, Sishir Subedi, Heather Hendrickson, and James M. Musser |
| EPI_ISL_790696                                                                                                                                                                                                                                                                                                                                                                                                                                                                                                                                                 | Dutch COVID-19 response team                                       | National Institute for Public Health and the Environment (RIVM)           | Adam Meijer, Harry Vennema, Jeroen Cremer, Sharon van den Brink, Bas van der Veer, AnneMarie van den Brandt, Florian Zwagemaker, Dennis Schmitz, Chantal Reusken, on behalf of the national COVID-19 response team                                                                                                                                                                                                                                                                                                                                                                                                                                                                                                                                                                               |                                                                                                                                                                                                                                           |
| EPI_ISL_791358, EPI_ISL_791367, EPI_ISL_791374, EPI_ISL_791395, EPI_ISL_791409, EPI_ISL_791412                                                                                                                                                                                                                                                                                                                                                                                                                                                                 | Johns Hopkins Hospital Department of Pathology                     | Johns Hopkins Hospital Department of Pathology                            | C. Paul Morris, Chun Huai Luo, Heba H. Mostafa                                                                                                                                                                                                                                                                                                                                                                                                                                                                                                                                                                                                                                                                                                                                                   |                                                                                                                                                                                                                                           |
| EPI_ISL_791444, EPI_ISL_791459                                                                                                                                                                                                                                                                                                                                                                                                                                                                                                                                 | Johns Hopkins Hospital Department of Pathology                     | Johns Hopkins Hospital Department of Pathology                            | C. Paul Morris, Chun Huai Luo, Adannaya Amadi, Nicholas Gallagher, Heba H. Mostafa                                                                                                                                                                                                                                                                                                                                                                                                                                                                                                                                                                                                                                                                                                               |                                                                                                                                                                                                                                           |
| EPI_ISL_791799                                                                                                                                                                                                                                                                                                                                                                                                                                                                                                                                                 | Massachusetts General Hospital                                     | Infectious Disease Program, Broad Institute of Harvard and MIT            | Lemieux,J.E., Siddle,K.J., Shaw,B., Adams,G., Pierce,V., Turbett,S., Anahtar,M., Branda,J., Slater,D., Harris,J., Lin,A.E., Gladden-Young,A., Lagerborg,K., Rudy,M., DeRuff,K., Carter,A., Normandin,E., Bauer,M., Reilly,S., Tomkins-Tinch,C., Loreth,C., Chaluvadi,S., Neumann,A., Cusick,C., Chapman,S.B., Gnrirke,A., Flowers,K., Cerrato,F., Birren,B.W., Gallagher,G., Smole,S., Park,D.J., MacInnis,B.L., Ryan,E., LaRocque,R., Rosenberg,E. and Sabeti,P.C                                                                                                                                                                                                                                                                                                                               |                                                                                                                                                                                                                                           |
| EPI_ISL_792087                                                                                                                                                                                                                                                                                                                                                                                                                                                                                                                                                 | Toronto Invasive Bacterial Diseases Network                        | McMaster University                                                       | Allison McGeer, Patryk Aftanas, Hooman Derakhshani, Angel Li, Kuganya Nirmalarajah, Emily Panousis, Ahmed Draia, Jalees Nasir, Michael Surette, Samira Mubareka, Andrew G. McArthur                                                                                                                                                                                                                                                                                                                                                                                                                                                                                                                                                                                                              |                                                                                                                                                                                                                                           |
| EPI_ISL_794015, EPI_ISL_794022, EPI_ISL_794023, EPI_ISL_794025, EPI_ISL_794027, EPI_ISL_794060, EPI_ISL_794062, EPI_ISL_794063, EPI_ISL_794064, EPI_ISL_794068, EPI_ISL_794069, EPI_ISL_794071, EPI_ISL_794075, EPI_ISL_794077, EPI_ISL_794078, EPI_ISL_794079                                                                                                                                                                                                                                                                                                 | see above                                                          | Wadsworth Center, New York State Department.of Health                     | Wadsworth Center, New York State Department.of Health                                                                                                                                                                                                                                                                                                                                                                                                                                                                                                                                                                                                                                                                                                                                            | Kirsten St. George, Daryl M. Lamson, Alexis Russel, Matthew Shudt, Melissa A Leisner, Jonathan Pitnick, Navjot Singh, John Kelly, Sara Griesemer, Erasmus Schneider, Erica Lasek-Nesselquist                                              |
| EPI_ISL_794089, EPI_ISL_794091, EPI_ISL_794094, EPI_ISL_794095, EPI_ISL_794096, EPI_ISL_794097, EPI_ISL_794098, EPI_ISL_794103                                                                                                                                                                                                                                                                                                                                                                                                                                 | URMC LABS                                                          | Wadsworth Center, New York State Department.of Health                     | Kirsten St. George, Daryl M. Lamson, Alexis Russel, Matthew Shudt, Melissa A Leisner, Jonathan Pitnick, Navjot Singh, John Kelly, Sara Griesemer, Erasmus Schneider, Erica Lasek-Nesselquist                                                                                                                                                                                                                                                                                                                                                                                                                                                                                                                                                                                                     |                                                                                                                                                                                                                                           |
| EPI_ISL_794108, EPI_ISL_794117, EPI_ISL_794118                                                                                                                                                                                                                                                                                                                                                                                                                                                                                                                 | GLENS FALLS HOSPITAL LABORATORY                                    | Wadsworth Center, New York State Department.of Health                     | Kirsten St. George, Daryl M. Lamson, Alexis Russel, Matthew Shudt, Melissa A Leisner, Jonathan Pitnick, Navjot Singh, John Kelly, Sara Griesemer, Erasmus Schneider, Erica Lasek-Nesselquist                                                                                                                                                                                                                                                                                                                                                                                                                                                                                                                                                                                                     |                                                                                                                                                                                                                                           |
| EPI_ISL_794127, EPI_ISL_794131, EPI_ISL_794132, EPI_ISL_794137, EPI_ISL_794141, EPI_ISL_794142, EPI_ISL_794143, EPI_ISL_794158                                                                                                                                                                                                                                                                                                                                                                                                                                 | NORTHWELL HEALTH LABORATORIES                                      | Wadsworth Center, New York State Department.of Health                     | Kirsten St. George, Daryl M. Lamson, Alexis Russel, Matthew Shudt, Melissa A Leisner, Jonathan Pitnick, Navjot Singh, John Kelly, Sara Griesemer, Erasmus Schneider, Erica Lasek-Nesselquist                                                                                                                                                                                                                                                                                                                                                                                                                                                                                                                                                                                                     |                                                                                                                                                                                                                                           |
| EPI_ISL_794160, EPI_ISL_794165                                                                                                                                                                                                                                                                                                                                                                                                                                                                                                                                 | Wadsworth Center, New York State Department.of Health              | Wadsworth Center, New York State Department.of Health                     | Kirsten St. George, Daryl M. Lamson, Alexis Russel, Matthew Shudt, Melissa A Leisner, Jonathan Pitnick, Navjot Singh, John Kelly, Sara Griesemer, Erasmus Schneider, Erica Lasek-Nesselquist                                                                                                                                                                                                                                                                                                                                                                                                                                                                                                                                                                                                     |                                                                                                                                                                                                                                           |
| EPI_ISL_794182, EPI_ISL_794189, EPI_ISL_794190, EPI_ISL_794194, EPI_ISL_794196, EPI_ISL_794197, EPI_ISL_794198                                                                                                                                                                                                                                                                                                                                                                                                                                                 | URMC LABS                                                          | Wadsworth Center, New York State Department.of Health                     | Kirsten St. George, Daryl M. Lamson, Alexis Russel, Matthew Shudt, Melissa A Leisner, Jonathan Pitnick, Navjot Singh, John Kelly, Sara Griesemer, Erasmus Schneider, Erica Lasek-Nesselquist                                                                                                                                                                                                                                                                                                                                                                                                                                                                                                                                                                                                     |                                                                                                                                                                                                                                           |
| EPI_ISL_794209, EPI_ISL_794210, EPI_ISL_794223, EPI_ISL_794235, EPI_ISL_794251, EPI_ISL_794270, EPI_ISL_794271, EPI_ISL_794280                                                                                                                                                                                                                                                                                                                                                                                                                                 | WESTCHESTER MEDICAL CENTER                                         | Wadsworth Center, New York State Department.of Health                     | Kirsten St. George, Daryl M. Lamson, Alexis Russel, Matthew Shudt, Melissa A Leisner, Jonathan Pitnick, Navjot Singh, John Kelly, Sara Griesemer, Erasmus Schneider, Erica Lasek-Nesselquist                                                                                                                                                                                                                                                                                                                                                                                                                                                                                                                                                                                                     |                                                                                                                                                                                                                                           |
| EPI_ISL_794297                                                                                                                                                                                                                                                                                                                                                                                                                                                                                                                                                 | Columbia University Irving Medical Center                          | Wadsworth Center, New York State Department.of Health                     | Kirsten St. George, Daryl M. Lamson, Alexis Russel, Matthew Shudt, Melissa A Leisner, Jonathan Pitnick, Navjot Singh, John Kelly, Sara Griesemer, Erasmus Schneider, Erica Lasek-Nesselquist                                                                                                                                                                                                                                                                                                                                                                                                                                                                                                                                                                                                     |                                                                                                                                                                                                                                           |
| EPI_ISL_794659                                                                                                                                                                                                                                                                                                                                                                                                                                                                                                                                                 | HOSPITAL UNIVERSITARIO SAN IGNACIO                                 | Instituto Nacional de Salud - Dirección de Investigación en Salud Pública | Katherine Laiton-Donato, Diego A. Álvarez-Díaz, Carlos Franco-Muñoz, Mauricio Pacheco-Montealegre, Jonathan Reales, Sheryl Corchuelo, Maria T. Herrera, Julian Naizaque, Gerardo Santamaría, Paola Muñoz-Laiton, Diego Andrés Prada, Magdalena Wiesner, Martha Lucia Ospina Martínez, Marcela Mercado-Reyes                                                                                                                                                                                                                                                                                                                                                                                                                                                                                      |                                                                                                                                                                                                                                           |
| EPI_ISL_801903, EPI_ISL_801933, EPI_ISL_802149, EPI_ISL_802157, EPI_ISL_802258, EPI_ISL_802392, EPI_ISL_802417, EPI_ISL_802421                                                                                                                                                                                                                                                                                                                                                                                                                                 | MSHS Clinical Microbiology Laboratories                            | MSHS Pathogen Surveillance Program                                        | Ana S. Gonzalez-Reiche, Hala Alshammery, Mitchell J. Sullivan, Brianne Ciferri, Ajay Obla, Angela Amoako, Mahmoud Awawda, Elena Hirsch, Ashley S. Salimbanon, Levy Sominsky, Katherine Beach, Kayla Russo, Charles Gleason, Shelcie Fabre, Giulio Kleiner, Zenab Khan, Bremy Albuquerque, Adriana van de Guchte, Komal Srivastava, Matthew M. Hernandez, Jayeeta Dutta, Denise Jurczynszak, Emily Ferreri, Rachel Chernet, Nancy Francoeur, Betsaida Salom Melo, Irina Oussenko, Gintaras Deikus, Juan Soto, Shwetha Hara Sridhar, Ying-Chih Wang, Kathryn Twyman, Andrew Kasarskis, Deena R. Altman, Robert Sebra, Adolfo Garcia-Sastre, Marta Luksza, Gopi Patel, Sarah Schaefer, Melissa Gitman, Michael D. Nowak, Alberto Paniz-Mondolfi, Emilia Mia Sordillo, Viviana Simon, Harm van Bakel |                                                                                                                                                                                                                                           |
| EPI_ISL_802428, EPI_ISL_802432                                                                                                                                                                                                                                                                                                                                                                                                                                                                                                                                 | SARATOGA HOSPITAL LABORATORY                                       | Wadsworth Center, New York State Department.of Health                     | Kirsten St. George, Daryl M. Lamson, Alexis Russel, Matthew Shudt, Melissa A Leisner, Jonathan Pitnick, Navjot Singh, John Kelly, Sara Griesemer, Erasmus Schneider, Erica Lasek-Nesselquist                                                                                                                                                                                                                                                                                                                                                                                                                                                                                                                                                                                                     |                                                                                                                                                                                                                                           |
| EPI_ISL_802464                                                                                                                                                                                                                                                                                                                                                                                                                                                                                                                                                 | Wadsworth Center, New York State Department.of Health              | Wadsworth Center, New York State Department.of Health                     | Kirsten St. George, Daryl M. Lamson, Alexis Russel, Matthew Shudt, Melissa A Leisner, Jonathan Pitnick, Navjot Singh, John Kelly, Sara Griesemer, Erasmus Schneider, Erica Lasek-Nesselquist                                                                                                                                                                                                                                                                                                                                                                                                                                                                                                                                                                                                     |                                                                                                                                                                                                                                           |
| EPI_ISL_802467                                                                                                                                                                                                                                                                                                                                                                                                                                                                                                                                                 | SARATOGA HOSPITAL LABORATORY                                       | Wadsworth Center, New York State Department.of Health                     | Kirsten St. George, Daryl M. Lamson, Alexis Russel, Matthew Shudt, Melissa A Leisner, Jonathan Pitnick, Navjot Singh, John Kelly, Sara Griesemer, Erasmus Schneider, Erica Lasek-Nesselquist                                                                                                                                                                                                                                                                                                                                                                                                                                                                                                                                                                                                     |                                                                                                                                                                                                                                           |
| EPI_ISL_802485, EPI_ISL_802489                                                                                                                                                                                                                                                                                                                                                                                                                                                                                                                                 | WESTCHESTER MEDICAL CENTER                                         | Wadsworth Center, New York State Department.of Health                     | Kirsten St. George, Daryl M. Lamson, Alexis Russel, Matthew Shudt, Melissa A Leisner, Jonathan Pitnick, Navjot Singh, John Kelly, Sara Griesemer, Erasmus Schneider, Erica Lasek-Nesselquist                                                                                                                                                                                                                                                                                                                                                                                                                                                                                                                                                                                                     |                                                                                                                                                                                                                                           |
| EPI_ISL_802492                                                                                                                                                                                                                                                                                                                                                                                                                                                                                                                                                 | SARATOGA HOSPITAL LABORATORY                                       | Wadsworth Center, New York State Department.of Health                     | Kirsten St. George, Daryl M. Lamson, Alexis Russel, Matthew Shudt, Melissa A Leisner, Jonathan Pitnick, Navjot Singh, John Kelly, Sara Griesemer, Erasmus Schneider, Erica Lasek-Nesselquist                                                                                                                                                                                                                                                                                                                                                                                                                                                                                                                                                                                                     |                                                                                                                                                                                                                                           |
| EPI_ISL_802567                                                                                                                                                                                                                                                                                                                                                                                                                                                                                                                                                 | Essentia Health-St. Mary's Medical Center                          | Minnesota Department of Health, Public Health Laboratory                  | Alexandra Lorentz, Jacob Garfin, Matt Plumb, and Xiong Wang                                                                                                                                                                                                                                                                                                                                                                                                                                                                                                                                                                                                                                                                                                                                      |                                                                                                                                                                                                                                           |
| EPI_ISL_802777, EPI_ISL_802778, EPI_ISL_802781, EPI_ISL_802782, EPI_ISL_802785, EPI_ISL_802786                                                                                                                                                                                                                                                                                                                                                                                                                                                                 | Columbia University Irving Medical Center                          | Wadsworth Center, New York State Department.of Health                     | Kirsten St. George, Daryl M. Lamson, Alexis Russel, Matthew Shudt, Melissa A Leisner, Jonathan Pitnick, Navjot Singh, John Kelly, Sara Griesemer, Erasmus Schneider, Erica Lasek-Nesselquist                                                                                                                                                                                                                                                                                                                                                                                                                                                                                                                                                                                                     |                                                                                                                                                                                                                                           |
| EPI_ISL_802989                                                                                                                                                                                                                                                                                                                                                                                                                                                                                                                                                 | Utah Public Health Laboratory                                      | Utah Public Health Laboratory                                             | Erin Young, Kelly Oakeson, Tara Gallagher                                                                                                                                                                                                                                                                                                                                                                                                                                                                                                                                                                                                                                                                                                                                                        |                                                                                                                                                                                                                                           |
| EPI_ISL_803058                                                                                                                                                                                                                                                                                                                                                                                                                                                                                                                                                 | Quest Diagnostics                                                  | Quest Diagnostics                                                         | Rosenthal,S.H., Gerasimova,A., Kagan,R.M., Anderson, B., Livingston, K.E., Hua, M., Liu Y., Shalhout, D.F., Owen, R., Lacbawan, F.                                                                                                                                                                                                                                                                                                                                                                                                                                                                                                                                                                                                                                                               |                                                                                                                                                                                                                                           |
| EPI_ISL_804030                                                                                                                                                                                                                                                                                                                                                                                                                                                                                                                                                 | Maryland Public Health Laboratory                                  | Maryland Public Health Laboratory                                         | Maryland Department of Health Laboratories Administration                                                                                                                                                                                                                                                                                                                                                                                                                                                                                                                                                                                                                                                                                                                                        |                                                                                                                                                                                                                                           |

|                                                                                                                                                                                                                                                                                                |                                                                                             |                                                                                                                        |                                                                                                                                                                                                                                                                                                                                                                                                                                                                                      |
|------------------------------------------------------------------------------------------------------------------------------------------------------------------------------------------------------------------------------------------------------------------------------------------------|---------------------------------------------------------------------------------------------|------------------------------------------------------------------------------------------------------------------------|--------------------------------------------------------------------------------------------------------------------------------------------------------------------------------------------------------------------------------------------------------------------------------------------------------------------------------------------------------------------------------------------------------------------------------------------------------------------------------------|
| EPI_ISL_804386                                                                                                                                                                                                                                                                                 | Dutch COVID-19 response team                                                                | National Institute for Public Health and the Environment (RIVM)                                                        | Adam Meijer, Harry Vennerma, Dirk Eggink, Matthijs Welkers, Jeroen Cremer, Sharon van den Brink, Bas van der Veer, AnneMarie van den Brandt, Florian Zwagemaker, Dennis Schmitz, Chantal Reusken, on behalf of the national COVID-19 response team                                                                                                                                                                                                                                   |
| EPI_ISL_804980                                                                                                                                                                                                                                                                                 | Columbia University Irving Medical Center                                                   | Wadsworth Center, New York State Department of Health                                                                  | Kirsten St. George, Daryl M. Lamson, Alexis Russel, Matthew Shudt, Melissa A Leisner, Jonathan Plitnick, Navjot Singh, John Kelly, Erasmus Schneider, Erica Lasek-Nesselquist                                                                                                                                                                                                                                                                                                        |
| EPI_ISL_806530                                                                                                                                                                                                                                                                                 | Charité Universitätsmedizin Berlin, Institut für Virologie/Labor Berlin                     | Charité Universitätsmedizin Berlin, Institut für Virologie Berlin                                                      | Victor M Corman, Jörn Beheim-Schwarzbach, Barbara Mühlemann, Julia Schneider, Talitha Veith, Cornelia Schlee, Tomasz Zemojtel, Terry Jones, Christian Drosten                                                                                                                                                                                                                                                                                                                        |
| EPI_ISL_806912, EPI_ISL_806917, EPI_ISL_806932, EPI_ISL_806934, EPI_ISL_807025, EPI_ISL_807123                                                                                                                                                                                                 | Washington State Department of Health                                                       | Seattle Flu Study                                                                                                      | Deborah A. Nickerson, Chris D. Frazier, Jover Lee, Benjamin Pelle, Matthew Richardson, Amanda Adler, Elisabeth Brandstetter, Peter D. Han, Kairsten Fay, Misja Ilcisin, Kirsten Lacombe, Thomas R. Sibley, Melissa Truong, Caitlin R. Wolf, Romesh Gautam, Geoff Melly, Brian Hiatt, Philip Dykema, Scott Lindquist, Michael Boeckh, Janet A. Englund, Michael Famulare, Barry R. Lutz, Mark J. Rieder, Lea M. Starita, Matthew Thompson, Helen Y. Chu, Jay Shendure, Trevor Bedford |
| EPI_ISL_812151, EPI_ISL_812160                                                                                                                                                                                                                                                                 | GA Department of Public Health Laboratory                                                   | Pathogen Discovery, Respiratory Viruses Branch, Division of Viral Diseases, Centers for Disease Control and Prevention | Yan Li, Ying Tao, Anna Montmayeur, Jing Zhang, Brian Lynch, Krista Queen, Anna Uehara, Rachel Marine, Peter Cook, Clinton R. Paden, Haibin Wang, Suxiang Tong                                                                                                                                                                                                                                                                                                                        |
| EPI_ISL_812222                                                                                                                                                                                                                                                                                 | TN Division of Laboratory Services                                                          | Pathogen Discovery, Respiratory Viruses Branch, Division of Viral Diseases, Centers for Disease Control and Prevention | Yan Li, Ying Tao, Anna Montmayeur, Jing Zhang, Brian Lynch, Krista Queen, Anna Uehara, Rachel Marine, Peter Cook, Clinton R. Paden, Haibin Wang, Suxiang Tong                                                                                                                                                                                                                                                                                                                        |
| EPI_ISL_812290                                                                                                                                                                                                                                                                                 | Delaware Public Health Lab                                                                  | Delaware Public Health Lab                                                                                             | Gregory Hovan                                                                                                                                                                                                                                                                                                                                                                                                                                                                        |
| EPI_ISL_812334                                                                                                                                                                                                                                                                                 | United States Air Force School of Aerospace Medicine                                        | United States Air Force School of Aerospace Medicine                                                                   | Anthony Fries, Jennifer Meyer, Amanda Javorina, Sarah Purves, William Gruner, Clarise Starr, Elizabeth Macias                                                                                                                                                                                                                                                                                                                                                                        |
| EPI_ISL_812463                                                                                                                                                                                                                                                                                 | Laboratorio de Referencia Nacional de Virus Respiratorios, Instituto Nacional de Salud Peru | Laboratorio de Genómica Microbiana, Universidad Peruana Cayetano Heredia                                               | Pablo Tsukayama, Alejandra Dávila-Barclay, Guillermo Salvatierra, Luis González, Pedro E. Romero, Brenda Ayzanoa, Janet Huancachoque, Pool Marcos, Camilla Castillo-Vilcahuamán, Oscar Escalante, Priscila Lope, Nancy Rojas                                                                                                                                                                                                                                                         |
| EPI_ISL_812593                                                                                                                                                                                                                                                                                 | United States Air Force School of Aerospace Medicine                                        | United States Air Force School of Aerospace Medicine                                                                   | Anthony Fries, Jennifer Meyer, Amanda Javorina, Sarah Purves, William Gruner, Clarise Starr, Elizabeth Macias                                                                                                                                                                                                                                                                                                                                                                        |
| EPI_ISL_812726                                                                                                                                                                                                                                                                                 | DOHMH Corona                                                                                | New York City Public Health Laboratory                                                                                 | Jade Wang, et al.                                                                                                                                                                                                                                                                                                                                                                                                                                                                    |
| EPI_ISL_812736, EPI_ISL_812756                                                                                                                                                                                                                                                                 | DOHMH Morrisania                                                                            | New York City Public Health Laboratory                                                                                 | Jade Wang, et al.                                                                                                                                                                                                                                                                                                                                                                                                                                                                    |
| EPI_ISL_815368                                                                                                                                                                                                                                                                                 | Centogene                                                                                   | Centogene                                                                                                              | Peter Bauer, Krishna Kumar Kandaswamy, Vivi Hue-Trang Lieu                                                                                                                                                                                                                                                                                                                                                                                                                           |
| EPI_ISL_819234, EPI_ISL_819270                                                                                                                                                                                                                                                                 | Wyoming Public Health Laboratory                                                            | Wyoming Public Health Laboratory                                                                                       | Noah Hull, Taylor Fearing, Lynette Gumbleton, Channing Weber, Ashley Norberg, Bailey Bowcutt, and Wanda Manley                                                                                                                                                                                                                                                                                                                                                                       |
| EPI_ISL_820607                                                                                                                                                                                                                                                                                 | Queens Medical Centre, Clinical Microbiology Department / DeepSeq Nottingham                | COVID-19 Genomics UK (COG-UK) Consortium                                                                               | Gemma Clark, Wendy Smith, Manjinder Khakh, Vicki M Fleming, Michelle M Lister, Hannah Howson-Wells, Jonathan Ball, Patrick McClure, Joseph Chappell, Theocharis Tsoleridis, Nadine Holmes, Matthew Carlisle, Christopher Moore, Fei Sang, Johnny Debebe, Victoria Wright, Matthew Loose                                                                                                                                                                                              |
| EPI_ISL_822536                                                                                                                                                                                                                                                                                 | Wales Specialist Virology Centre Sequencing lab: Pathogen Genomics Unit                     | COVID-19 Genomics UK (COG-UK) Consortium                                                                               | Catherine Moore, Johnathan Evans, Laura Gifford, Malorie Perry, Simon Cottrell, Angela Marchbank, Alec Birchley, Alexander Adams, Amy Gaskin, Bree Gatica-Wilcox, Jason Coombes, Joel Southgate, Lauren Gilbert, Lee Graham, Nicole Pacchiarini, Sara Kumziene-Summerhayes, Sarah Taylor, Sophie Jones, Sara Rey, Matthew Bull, Joanne Watkins, Sally Corden, Tom Connor                                                                                                             |
| EPI_ISL_823817, EPI_ISL_823818                                                                                                                                                                                                                                                                 | DOHMH Corona                                                                                | New York City Public Health Laboratory                                                                                 | Jade Wang, et al.                                                                                                                                                                                                                                                                                                                                                                                                                                                                    |
| EPI_ISL_823838                                                                                                                                                                                                                                                                                 | DOHMH Central Harlem                                                                        | New York City Public Health Laboratory                                                                                 | Jade Wang, et al.                                                                                                                                                                                                                                                                                                                                                                                                                                                                    |
| EPI_ISL_823914                                                                                                                                                                                                                                                                                 | DOHMH PHL                                                                                   | New York City Public Health Laboratory                                                                                 | Jade Wang, et al.                                                                                                                                                                                                                                                                                                                                                                                                                                                                    |
| EPI_ISL_823931                                                                                                                                                                                                                                                                                 | DOHMH Corona                                                                                | New York City Public Health Laboratory                                                                                 | Jade Wang, et al.                                                                                                                                                                                                                                                                                                                                                                                                                                                                    |
| EPI_ISL_823936                                                                                                                                                                                                                                                                                 | DOHMH Crown Heights                                                                         | New York City Public Health Laboratory                                                                                 | Jade Wang, et al.                                                                                                                                                                                                                                                                                                                                                                                                                                                                    |
| EPI_ISL_823952                                                                                                                                                                                                                                                                                 | DOHMH Riverside                                                                             | New York City Public Health Laboratory                                                                                 | Jade Wang, et al.                                                                                                                                                                                                                                                                                                                                                                                                                                                                    |
| EPI_ISL_824294                                                                                                                                                                                                                                                                                 | Institute of Microbiology, Universidad San Francisco de Quito                               | Institute of Microbiology, Universidad San Francisco de Quito                                                          | Belén Prado-Vivar, Sully Márquez, Juan José Guadalupe, Monica Becerra-Wong, Bernardo Gutiérrez, Eulalia Pazmiño, Katalina Pacheco, Verónica Barragán, Patricio Rojas-Silva, Gabriel Trueba, Michelle Grunauer, Paul Cárdenas                                                                                                                                                                                                                                                         |
| EPI_ISL_824296                                                                                                                                                                                                                                                                                 | DOHMH Jamaica                                                                               | New York City Public Health Laboratory                                                                                 | Jade Wang, et al.                                                                                                                                                                                                                                                                                                                                                                                                                                                                    |
| EPI_ISL_824524, EPI_ISL_824547                                                                                                                                                                                                                                                                 | New Mexico Department of Health Scientific Laboratory                                       | New Mexico Department of Health Scientific Laboratory                                                                  | Ellie Johnson, Anastacia Griego-Fisher, D'eltra Malone                                                                                                                                                                                                                                                                                                                                                                                                                               |
| EPI_ISL_824894                                                                                                                                                                                                                                                                                 | UW Virology Lab                                                                             | UW Virology Lab                                                                                                        | Pavitra Roychoudhury, Hong Xie, Lasata Shrestha, Meei-Li Huang, Keith R Jerome, Alexander Greninger                                                                                                                                                                                                                                                                                                                                                                                  |
| EPI_ISL_824947, EPI_ISL_824963                                                                                                                                                                                                                                                                 | Maryland Public Health Laboratory                                                           | Maryland Public Health Laboratory                                                                                      | Maryland Department of Health Laboratories Administration                                                                                                                                                                                                                                                                                                                                                                                                                            |
| EPI_ISL_824989                                                                                                                                                                                                                                                                                 | Arizona State Public Health Laboratory                                                      | Arizona State Public Health Laboratory                                                                                 | Trung Huynh, Jessica Escobar, Katherine Fullerton, Nobuko Fukushima, Stacy White, Linda Getsinger, Victor Waddell                                                                                                                                                                                                                                                                                                                                                                    |
| EPI_ISL_830230                                                                                                                                                                                                                                                                                 | KALEIDA CENTER FOR LABORATORY MEDICINE                                                      | Wadsworth Center, New York State Department of Health                                                                  | Kirsten St. George, Daryl M. Lamson, Alexis Russel, Matthew Shudt, Melissa A Leisner, Jonathan Plitnick, Navjot Singh, John Kelly, Erasmus Schneider, Erica Lasek-Nesselquist                                                                                                                                                                                                                                                                                                        |
| EPI_ISL_830280, EPI_ISL_830284, EPI_ISL_830286, EPI_ISL_830289, EPI_ISL_830294, EPI_ISL_830296, EPI_ISL_830298, EPI_ISL_830300, EPI_ISL_830306, EPI_ISL_830308, EPI_ISL_830312, EPI_ISL_830313, EPI_ISL_830315, EPI_ISL_830319, EPI_ISL_830321, EPI_ISL_830323, EPI_ISL_830338, EPI_ISL_830348 | see above                                                                                   | Wadsworth Center, New York State Department of Health                                                                  | Kirsten St. George, Daryl M. Lamson, Alexis Russel, Matthew Shudt, Melissa A Leisner, Jonathan Plitnick, Navjot Singh, John Kelly, Erasmus Schneider, Erica Lasek-Nesselquist                                                                                                                                                                                                                                                                                                        |
| EPI_ISL_830581, EPI_ISL_830584, EPI_ISL_830591, EPI_ISL_830596, EPI_ISL_830611, EPI_ISL_830626, EPI_ISL_830627                                                                                                                                                                                 | KALEIDA CENTER FOR LABORATORY MEDICINE                                                      | Wadsworth Center, New York State Department of Health                                                                  | Kirsten St. George, Daryl M. Lamson, Alexis Russel, Matthew Shudt, Melissa A Leisner, Jonathan Plitnick, Navjot Singh, John Kelly, Erasmus Schneider, Erica Lasek-Nesselquist                                                                                                                                                                                                                                                                                                        |
| EPI_ISL_830632, EPI_ISL_830640                                                                                                                                                                                                                                                                 | NORTHWELL HEALTH LABORATORIES                                                               | Wadsworth Center, New York State Department of Health                                                                  | Kirsten St. George, Daryl M. Lamson, Alexis Russel, Matthew Shudt, Melissa A Leisner, Jonathan Plitnick, Navjot Singh, John Kelly, Erasmus Schneider, Erica Lasek-Nesselquist                                                                                                                                                                                                                                                                                                        |
| EPI_ISL_830654, EPI_ISL_830656, EPI_ISL_830660, EPI_ISL_830668, EPI_ISL_830672, EPI_ISL_830673, EPI_ISL_830680, EPI_ISL_830681, EPI_ISL_830682                                                                                                                                                 | SUNY UPSTATE MEDICAL UNIVERSITY                                                             | Wadsworth Center, New York State Department of Health                                                                  | Kirsten St. George, Daryl M. Lamson, Alexis Russel, Matthew Shudt, Melissa A Leisner, Jonathan Plitnick, Navjot Singh, John Kelly, Erasmus Schneider, Erica Lasek-Nesselquist                                                                                                                                                                                                                                                                                                        |
| EPI_ISL_830683, EPI_ISL_830686, EPI_ISL_830688, EPI_ISL_830698, EPI_ISL_830712                                                                                                                                                                                                                 | ALBANY MEDICAL CENTER HOSPITAL CLINICAL LABORATORIES                                        | Wadsworth Center, New York State Department of Health                                                                  | Kirsten St. George, Daryl M. Lamson, Alexis Russel, Matthew Shudt, Melissa A Leisner, Jonathan Plitnick, Navjot Singh, John Kelly, Erasmus Schneider, Erica Lasek-Nesselquist                                                                                                                                                                                                                                                                                                        |
| EPI_ISL_831298, EPI_ISL_831315, EPI_ISL_831316, EPI_ISL_831320, EPI_ISL_831321                                                                                                                                                                                                                 | Texas Department of State Health Services                                                   | Texas Department of State Health Services                                                                              | Anita Pokharel, Bonnie Oh, James Daniel Bonser, Rashmi Tuladhar, Mayela Pedrueza, Jenny Zhang, Maliha Rahman, Myong Koag, Chung Wang, Rachel Lee, Grace Kubin                                                                                                                                                                                                                                                                                                                        |
| EPI_ISL_831485, EPI_ISL_831567, EPI_ISL_831609                                                                                                                                                                                                                                                 | University of Wisconsin-Madison AIDS Vaccine Research Laboratories                          | University of Wisconsin-Madison AIDS Vaccine Research Laboratories                                                     | Gage Moreno, Katarina Braun, et al. AIDS Vaccine Research Laboratories                                                                                                                                                                                                                                                                                                                                                                                                               |
| EPI_ISL_831860                                                                                                                                                                                                                                                                                 | United States Air Force School of Aerospace Medicine                                        | United States Air Force School of Aerospace Medicine                                                                   | Anthony Fries, Jennifer Meyer, William Gruner, Amanda Javorina, Sarah Purves, Clarise Starr, Elizabeth Macias                                                                                                                                                                                                                                                                                                                                                                        |
| EPI_ISL_831973                                                                                                                                                                                                                                                                                 | Klinisk mikrobiologi                                                                        | The Public Health Agency of Sweden                                                                                     | Department of Microbiology, The Public Health Agency of Sweden                                                                                                                                                                                                                                                                                                                                                                                                                       |
| EPI_ISL_832025, EPI_ISL_832026                                                                                                                                                                                                                                                                 | Wyoming Public Health Laboratory                                                            | Wyoming Public Health Laboratory                                                                                       | Noah Hull, Taylor Fearing, Lynette Gumbleton, Channing Weber, Ashley Norberg, Bailey Bowcutt, and Wanda Manley                                                                                                                                                                                                                                                                                                                                                                       |



|                                                                                                                                                                                                                                                                |                                                         |                                                                                                                            |                                                                                                                                                                                                                                                                                                                                                                                                                                                                                                                                                                                 |
|----------------------------------------------------------------------------------------------------------------------------------------------------------------------------------------------------------------------------------------------------------------|---------------------------------------------------------|----------------------------------------------------------------------------------------------------------------------------|---------------------------------------------------------------------------------------------------------------------------------------------------------------------------------------------------------------------------------------------------------------------------------------------------------------------------------------------------------------------------------------------------------------------------------------------------------------------------------------------------------------------------------------------------------------------------------|
| EPI_ISL_832296, EPI_ISL_832305                                                                                                                                                                                                                                 | DOHMH Riverside                                         | New York City Public Health Laboratory                                                                                     | Jade Wang, et al.                                                                                                                                                                                                                                                                                                                                                                                                                                                                                                                                                               |
| EPI_ISL_832308                                                                                                                                                                                                                                                 | DOHMH Jamaica                                           | New York City Public Health Laboratory                                                                                     | Jade Wang, et al.                                                                                                                                                                                                                                                                                                                                                                                                                                                                                                                                                               |
| EPI_ISL_832343, EPI_ISL_832344                                                                                                                                                                                                                                 | DOHMH Morrisania                                        | New York City Public Health Laboratory                                                                                     | Jade Wang, et al.                                                                                                                                                                                                                                                                                                                                                                                                                                                                                                                                                               |
| EPI_ISL_832471, EPI_ISL_832483, EPI_ISL_832507, EPI_ISL_832537, EPI_ISL_832594, EPI_ISL_832632, EPI_ISL_832652, EPI_ISL_832695, EPI_ISL_832720, EPI_ISL_832767, EPI_ISL_832799                                                                                 |                                                         |                                                                                                                            |                                                                                                                                                                                                                                                                                                                                                                                                                                                                                                                                                                                 |
| see above                                                                                                                                                                                                                                                      | OHSU Lab Services Molecular Microbiology Lab            | Oregon SARS-CoV-2 Genome Sequencing Center                                                                                 | Brendan L. O'Connell, Ruth V. Nichols, Sally Grindstaff, Alec J. Hirsch, Donna Hansel, Guang Fan, Daniel N. Streblov, William B. Messer, Andrew C. Adey, Benjamin N. Bimber, Brian J. O'Roak                                                                                                                                                                                                                                                                                                                                                                                    |
| EPI_ISL_832993                                                                                                                                                                                                                                                 | Maine HETL                                              | Tewhey Lab, The Jackson Laboratory                                                                                         | Matluk,N., Dewey,H., Iosue,F., Barter,M., Lynch,R., Munger,H. and Tewhey,R.                                                                                                                                                                                                                                                                                                                                                                                                                                                                                                     |
| EPI_ISL_837509, EPI_ISL_837525                                                                                                                                                                                                                                 | UW Virology Lab                                         | UW Virology Lab                                                                                                            | Pavitra Roychoudhury, Hong Xie, Lasata Shrestha, Meei-Li Huang, Keith R Jerome, Alexander Greninger                                                                                                                                                                                                                                                                                                                                                                                                                                                                             |
| EPI_ISL_837686, EPI_ISL_837699, EPI_ISL_837700, EPI_ISL_837726, EPI_ISL_837730, EPI_ISL_837734, EPI_ISL_837735, EPI_ISL_837738, EPI_ISL_837741, EPI_ISL_837746, EPI_ISL_837749, EPI_ISL_837753, EPI_ISL_837765, EPI_ISL_837794, EPI_ISL_837795, EPI_ISL_837798 |                                                         |                                                                                                                            |                                                                                                                                                                                                                                                                                                                                                                                                                                                                                                                                                                                 |
| see above                                                                                                                                                                                                                                                      | Instituto Nacional de Enfermedades Respiratorias (INER) | Instituto Nacional de Enfermedades Respiratorias (INER)                                                                    | Celia Boukadida, Margarita Matias-Florentino, Alma Rincón-Rubio, Hector Esteban Paz-Juárez, Olivia Briceño, Edgar Sevilla-Reyes, Fidencio Mejia-Nepomuceno, Mario Mújica-Sánchez, Eduardo Becerril-Vargas, José Arturo Martínez-Orozco, Alejandra Hernández-Terán, Jorge Salas-Hernández, Santiago Ávila-Ríos, Joel Armando Vázquez-Pérez                                                                                                                                                                                                                                       |
| EPI_ISL_843187                                                                                                                                                                                                                                                 | Maryland Public Health Laboratory                       | Maryland Public Health Laboratory                                                                                          | Maryland Department of Health Laboratories Administration                                                                                                                                                                                                                                                                                                                                                                                                                                                                                                                       |
| EPI_ISL_845657, EPI_ISL_845679                                                                                                                                                                                                                                 | Quest Diagnostics                                       | Quest Diagnostics                                                                                                          | Rosenthal,S.H., Gerasimova,A., Kagan,R.M., Anderson, B., Bernstein, L.E., Livingston, K.E., Hua, M., Liu Y., Shalhout, D.F., Shlyakhter, I.A., Owen, R., Lacbawan, F.                                                                                                                                                                                                                                                                                                                                                                                                           |
| EPI_ISL_845892                                                                                                                                                                                                                                                 | Benaroya Research Institute                             | UW Virology Lab                                                                                                            | Pavitra Roychoudhury, Hong Xie, Lasata Shrestha, Michelle Lin, Meei-Li Huang, Keith R Jerome, Alexander Greninger                                                                                                                                                                                                                                                                                                                                                                                                                                                               |
| EPI_ISL_847535, EPI_ISL_847547, EPI_ISL_847551, EPI_ISL_847645                                                                                                                                                                                                 | California Department of Public Health                  | Chiu Laboratory, University of California, San Francisco                                                                   | Charles Chiu, Xianding (Wayne) Deng, Candace Wang, Brian Bushnell, Scot Federman, Jill Hacker, Debra Wadford                                                                                                                                                                                                                                                                                                                                                                                                                                                                    |
| EPI_ISL_847899                                                                                                                                                                                                                                                 | University Hospitals of Geneva, Laboratory of Virology  | HUG, Laboratory of Virology and the Health2030 Genome Center                                                               | Samuel Cordey, Ana Rita Goncalves, Laurent Kaiser, Lorenzo Cerutti, Henri Pegeot, Melyssa Elies, Keith Harshman, Ioannis Xenarios, Emmanouil Dermizakis                                                                                                                                                                                                                                                                                                                                                                                                                         |
| EPI_ISL_848221, EPI_ISL_848232, EPI_ISL_848235, EPI_ISL_848236, EPI_ISL_848299, EPI_ISL_848459, EPI_ISL_848517                                                                                                                                                 | Illinois Department of Public Health                    | Gagnon Lab, Southern Illinois University                                                                                   | Keith Gagnon                                                                                                                                                                                                                                                                                                                                                                                                                                                                                                                                                                    |
| EPI_ISL_848653, EPI_ISL_848667, EPI_ISL_848674, EPI_ISL_848682                                                                                                                                                                                                 | Florida Bureau of Public Health Laboratories            | Florida Bureau of Public Health Laboratories                                                                               | Sarah Schmedes, Jason Blanton                                                                                                                                                                                                                                                                                                                                                                                                                                                                                                                                                   |
| EPI_ISL_849206, EPI_ISL_849275                                                                                                                                                                                                                                 | Utah Public Health Laboratory                           | Utah Public Health Laboratory                                                                                              | Erin L. Young, Kelly F. Oakeson, Tara Gallagher                                                                                                                                                                                                                                                                                                                                                                                                                                                                                                                                 |
| EPI_ISL_849489                                                                                                                                                                                                                                                 | Seattle Flu Study                                       | Seattle Flu Study                                                                                                          | Deborah A. Nickerson, Chris D. Frazar, Jover Lee, Benjamin Pelle, Matthew Richardson, Amanda Adler, Elisabeth Brandstetter, Peter D. Han, Kairsten Fay, Misja Ilcisin, Kirsten Lacombe, Thomas R. Sibley, Melissa Truong, Caitlin R. Wolf, Michael Boeckh, Janet A. Englund, Michael Famulare, Barry R. Lutz, Mark J. Rieder, Lea M. Starita, Matthew Thompson, Jay Shendure, Trevor Bedford, Helen Y. Chu                                                                                                                                                                      |
| EPI_ISL_849596                                                                                                                                                                                                                                                 | Seattle Flu Study                                       | Seattle Flu Study                                                                                                          | Deborah A. Nickerson, Chris D. Frazar, Jover Lee, Benjamin Pelle, Matthew Richardson, Amanda Adler, Elisabeth Brandstetter, Peter D. Han, Kairsten Fay, Misja Ilcisin, Kirsten Lacombe, Thomas R. Sibley, Melissa Truong, Caitlin R. Wolf, Karen Cowgill, Stephanie Schrag, Jeff Duchin, Michael Boeckh, Janet A. Englund, Michael Famulare, Barry R. Lutz, Mark J. Rieder, Lea M. Starita, Matthew Thompson, Helen Y. Chu, Trevor Bedford, Jay Shendure                                                                                                                        |
| EPI_ISL_849615                                                                                                                                                                                                                                                 | Seattle Flu Study                                       | Seattle Flu Study                                                                                                          | Deborah A. Nickerson, Chris D. Frazar, Jover Lee, Benjamin Pelle, Matthew Richardson, Amanda Adler, Elisabeth Brandstetter, Peter D. Han, Kairsten Fay, Misja Ilcisin, Kirsten Lacombe, Thomas R. Sibley, Melissa Truong, Caitlin R. Wolf, Michael Boeckh, Janet A. Englund, Michael Famulare, Barry R. Lutz, Mark J. Rieder, Lea M. Starita, Matthew Thompson, Jay Shendure, Trevor Bedford, Helen Y. Chu                                                                                                                                                                      |
| EPI_ISL_849779                                                                                                                                                                                                                                                 | Utah Public Health Laboratory                           | Utah Public Health Laboratory                                                                                              | Erin L. Young, Kelly F. Oakeson, Tara Gallagher                                                                                                                                                                                                                                                                                                                                                                                                                                                                                                                                 |
| EPI_ISL_850156                                                                                                                                                                                                                                                 | Renegade                                                | Chan-Zuckerberg Biohub                                                                                                     | CZB Ciliahub Consortium                                                                                                                                                                                                                                                                                                                                                                                                                                                                                                                                                         |
| EPI_ISL_850835, EPI_ISL_850893                                                                                                                                                                                                                                 | Helix // Illumina                                       | Genomics and Discovery, Respiratory Viruses Branch, Division of Viral Diseases, Centers for Disease Control and Prevention | Peter W. Cook, Dhvani Batra, Ben L. Rambo-Martin Eileen de Feo, Jan Antico, Christine Tran, Matthew Tolentino, Shannon Wickline, Kim Gietzen, Brad Sickler, Jingtao Liu, Eric Allen, Phil Febbo, Summer Galloway, Nicole L. Washington, Simon White, Geraint Levan, Kelly Schiabor Barrett, Elizabeth Cirulli, Alexandre Bolze, Ary Ascencio, Charlotte Rivera-Garcia, Ryan Cho, Jason Nguyen, Sherry Wang, Jimmy Ramirez, Tyler Cassens, Efrén Sandoval, Magnus Isaksson, William Lee, David Becker, Marc Laurent, James Lu, Clinton R. Paden, Suxiang Tong, Duncan MacCannell |
| EPI_ISL_850996, EPI_ISL_851026, EPI_ISL_851037                                                                                                                                                                                                                 | Helix/Illumina                                          | Genomics and Discovery, Respiratory Viruses Branch, Division of Viral Diseases, Centers for Disease Control and Prevention | Peter W. Cook, Dhvani Batra, Ben L. Rambo-Martin Eileen de Feo, Jan Antico, Christine Tran, Matthew Tolentino, Shannon Wickline, Kim Gietzen, Brad Sickler, Jingtao Liu, Eric Allen, Phil Febbo, Summer Galloway, Nicole L. Washington, Simon White, Geraint Levan, Kelly Schiabor Barrett, Elizabeth Cirulli, Alexandre Bolze, Ary Ascencio, Charlotte Rivera-Garcia, Ryan Cho, Jason Nguyen, Sherry Wang, Jimmy Ramirez, Tyler Cassens, Efrén Sandoval, Magnus Isaksson, William Lee, David Becker, Marc Laurent, James Lu, Clinton R. Paden, Suxiang Tong, Duncan MacCannell |
| EPI_ISL_852827                                                                                                                                                                                                                                                 | Microbiology Lab                                        | NBCC Sequencing Facility                                                                                                   | Dr. Jeff Wrana                                                                                                                                                                                                                                                                                                                                                                                                                                                                                                                                                                  |
| EPI_ISL_853422, EPI_ISL_853448, EPI_ISL_853449, EPI_ISL_853456, EPI_ISL_853506                                                                                                                                                                                 | Santa Clara County Public Health Laboratory             | Chan-Zuckerberg Biohub                                                                                                     | CZB Ciliahub Consortium                                                                                                                                                                                                                                                                                                                                                                                                                                                                                                                                                         |
| EPI_ISL_853652                                                                                                                                                                                                                                                 | THE MARY IMOGENE BASSETT HOSPITAL                       | Wadsworth Center, New York State Department of Health                                                                      | Kirsten St. George, Daryl M. Lamson, Alexis Russel, Matthew Shudt, Melissa A Leisner, Jonathan Plitnick, Navjot Singh, John Kelly, Erasmus Schneider, Erica Lasek-Nesselquist                                                                                                                                                                                                                                                                                                                                                                                                   |
| EPI_ISL_853653, EPI_ISL_853664, EPI_ISL_853670, EPI_ISL_853675                                                                                                                                                                                                 | NORTHWELL HEALTH LABORATORIES                           | Wadsworth Center, New York State Department of Health                                                                      | Kirsten St. George, Daryl M. Lamson, Alexis Russel, Matthew Shudt, Melissa A Leisner, Jonathan Plitnick, Navjot Singh, John Kelly, Erasmus Schneider, Erica Lasek-Nesselquist                                                                                                                                                                                                                                                                                                                                                                                                   |
| EPI_ISL_853687                                                                                                                                                                                                                                                 | ALBANY MEDICAL CENTER HOSPITAL CLINICAL LABORATORIES    | Wadsworth Center, New York State Department of Health                                                                      | Kirsten St. George, Daryl M. Lamson, Alexis Russel, Matthew Shudt, Melissa A Leisner, Jonathan Plitnick, Navjot Singh, John Kelly, Erasmus Schneider, Erica Lasek-Nesselquist                                                                                                                                                                                                                                                                                                                                                                                                   |
| EPI_ISL_853707, EPI_ISL_853715                                                                                                                                                                                                                                 | SUNY UPSTATE MEDICAL UNIVERSITY                         | Wadsworth Center, New York State Department of Health                                                                      | Kirsten St. George, Daryl M. Lamson, Alexis Russel, Matthew Shudt, Melissa A Leisner, Jonathan Plitnick, Navjot Singh, John Kelly, Erasmus Schneider, Erica Lasek-Nesselquist                                                                                                                                                                                                                                                                                                                                                                                                   |
| EPI_ISL_854306, EPI_ISL_854307, EPI_ISL_854310, EPI_ISL_854316, EPI_ISL_854317, EPI_ISL_854330, EPI_ISL_854331, EPI_ISL_854338, EPI_ISL_854341, EPI_ISL_854343                                                                                                 | URMC LABS                                               | Wadsworth Center, New York State Department of Health                                                                      | Kirsten St. George, Daryl M. Lamson, Alexis Russel, Matthew Shudt, Melissa A Leisner, Jonathan Plitnick, Navjot Singh, John Kelly, Erasmus Schneider, Erica Lasek-Nesselquist                                                                                                                                                                                                                                                                                                                                                                                                   |
| EPI_ISL_854351, EPI_ISL_854357, EPI_ISL_854366, EPI_ISL_854369                                                                                                                                                                                                 | BIO-REFERENCE LABORATORIES                              | Wadsworth Center, New York State Department of Health                                                                      | Kirsten St. George, Daryl M. Lamson, Alexis Russel, Matthew Shudt, Melissa A Leisner, Jonathan Plitnick, Navjot Singh, John Kelly, Erasmus Schneider, Erica Lasek-Nesselquist                                                                                                                                                                                                                                                                                                                                                                                                   |
| EPI_ISL_854415, EPI_ISL_854420, EPI_ISL_854422, EPI_ISL_854426, EPI_ISL_854427, EPI_ISL_854432                                                                                                                                                                 | MONTEFIORE MEDICAL CENTER LABORATORIES                  | Wadsworth Center, New York State Department of Health                                                                      | Kirsten St. George, Daryl M. Lamson, Alexis Russel, Matthew Shudt, Melissa A Leisner, Jonathan Plitnick, Navjot Singh, John Kelly, Erasmus Schneider, Erica Lasek-Nesselquist                                                                                                                                                                                                                                                                                                                                                                                                   |
| EPI_ISL_854443, EPI_ISL_854444                                                                                                                                                                                                                                 | SARATOGA HOSPITAL LABORATORY                            | Wadsworth Center, New York State Department of Health                                                                      | Kirsten St. George, Daryl M. Lamson, Alexis Russel, Matthew Shudt, Melissa A Leisner, Jonathan Plitnick, Navjot Singh, John Kelly, Erasmus Schneider, Erica Lasek-Nesselquist                                                                                                                                                                                                                                                                                                                                                                                                   |
| EPI_ISL_854857, EPI_ISL_854865,                                                                                                                                                                                                                                | Quest Diagnostics                                       | Quest Diagnostics                                                                                                          | Rosenthal,S.H., Gerasimova,A., Kagan,R.M., Anderson, B., Hua, M., Liu Y., Bernstein, L.E., Livingston, K.E., Perez, A., Shalhout, D.F., Shlyakhter, I.A.,                                                                                                                                                                                                                                                                                                                                                                                                                       |

|                                                                                                                                                                                                                                                |                                                                                                  |                                                                                                  |                                                                                                                                                                                                                      |
|------------------------------------------------------------------------------------------------------------------------------------------------------------------------------------------------------------------------------------------------|--------------------------------------------------------------------------------------------------|--------------------------------------------------------------------------------------------------|----------------------------------------------------------------------------------------------------------------------------------------------------------------------------------------------------------------------|
| EPI_ISL_854970, EPI_ISL_854973, EPI_ISL_855056, EPI_ISL_855131, EPI_ISL_855155, EPI_ISL_855184                                                                                                                                                 |                                                                                                  |                                                                                                  |                                                                                                                                                                                                                      |
| EPI_ISL_855551                                                                                                                                                                                                                                 | Cerballiance Wilson                                                                              | CERBA LAB                                                                                        | Roquebert B; Merah K; Olivi M; Herhira S; Lecorche E; Trombert S; Verdurme L; Malek R; Zimmer S; Costa JM; Haim-Boukobza S                                                                                           |
| EPI_ISL_856943                                                                                                                                                                                                                                 | Wyoming Public Health Laboratory                                                                 | Wyoming Public Health Laboratory                                                                 | Noah Hull, Taylor Fearing, Lynette Gumbleton, Channing Weber, Ashley Norberg, Bailey Bowcutt, and Wanda Manley                                                                                                       |
| EPI_ISL_857065                                                                                                                                                                                                                                 | DOHMH PHL                                                                                        | New York City Public Health Laboratory                                                           | Jade Wang, et al.                                                                                                                                                                                                    |
| EPI_ISL_857077                                                                                                                                                                                                                                 | DOHMH Central Harlem                                                                             | New York City Public Health Laboratory                                                           | Jade Wang, et al.                                                                                                                                                                                                    |
| EPI_ISL_857146                                                                                                                                                                                                                                 | DOHMH Corona                                                                                     | New York City Public Health Laboratory                                                           | Jade Wang, et al.                                                                                                                                                                                                    |
| EPI_ISL_857157, EPI_ISL_857162                                                                                                                                                                                                                 | DOHMH PHL                                                                                        | New York City Public Health Laboratory                                                           | Jade Wang, et al.                                                                                                                                                                                                    |
| EPI_ISL_857208                                                                                                                                                                                                                                 | DOHMH Morrisania                                                                                 | New York City Public Health Laboratory                                                           | Jade Wang, et al.                                                                                                                                                                                                    |
| EPI_ISL_857209                                                                                                                                                                                                                                 | DOHMH Central Harlem                                                                             | New York City Public Health Laboratory                                                           | Jade Wang, et al.                                                                                                                                                                                                    |
| EPI_ISL_857227                                                                                                                                                                                                                                 | DOHMH Riverside                                                                                  | New York City Public Health Laboratory                                                           | Jade Wang, et al.                                                                                                                                                                                                    |
| EPI_ISL_857234, EPI_ISL_857236, EPI_ISL_857237, EPI_ISL_857243, EPI_ISL_857244, EPI_ISL_857246, EPI_ISL_857250                                                                                                                                 | DOHMH Jamaica                                                                                    | New York City Public Health Laboratory                                                           | Jade Wang, et al.                                                                                                                                                                                                    |
| EPI_ISL_857261, EPI_ISL_857262                                                                                                                                                                                                                 | DOHMH Chelsea                                                                                    | New York City Public Health Laboratory                                                           | Jade Wang, et al.                                                                                                                                                                                                    |
| EPI_ISL_857269, EPI_ISL_857276                                                                                                                                                                                                                 | DOHMH Jamaica                                                                                    | New York City Public Health Laboratory                                                           | Jade Wang, et al.                                                                                                                                                                                                    |
| EPI_ISL_857295                                                                                                                                                                                                                                 | OCME Office Of Chief Medical Examiner                                                            | New York City Public Health Laboratory                                                           | Jade Wang, et al.                                                                                                                                                                                                    |
| EPI_ISL_859668                                                                                                                                                                                                                                 | BTC, Khalifa University                                                                          | BTC, Khalifa University                                                                          | Al Safar et al                                                                                                                                                                                                       |
| EPI_ISL_860989, EPI_ISL_860998, EPI_ISL_861014, EPI_ISL_861026                                                                                                                                                                                 | Johns Hopkins Hospital Department of Pathology                                                   | Johns Hopkins Hospital Department of Pathology                                                   | C. Paul Morris, Chun Huai Luo, Adannaya Amadi, Nicholas Gallagher, Heba H. Mostafa                                                                                                                                   |
| EPI_ISL_861112, EPI_ISL_861118, EPI_ISL_861120, EPI_ISL_861133                                                                                                                                                                                 | New York Presbyterian Hospital                                                                   | Wadsworth Center, New York State Department of Health                                            | Kirsten St. George, Daryl M. Lamson, Alexis Russel, Matthew Shudt, Melissa A Leisner, Jonathan Plitnick, Navjot Singh, John Kelly, Erasmus Schneider, Erica Lasek-Nesselquist                                        |
| EPI_ISL_861139, EPI_ISL_861140                                                                                                                                                                                                                 | ADIRONDACK MEDICAL CENTER                                                                        | Wadsworth Center, New York State Department of Health                                            | Kirsten St. George, Daryl M. Lamson, Alexis Russel, Matthew Shudt, Melissa A Leisner, Jonathan Plitnick, Navjot Singh, John Kelly, Erasmus Schneider, Erica Lasek-Nesselquist                                        |
| EPI_ISL_861144, EPI_ISL_861166                                                                                                                                                                                                                 | KALEIDA CENTER FOR LABORATORY MEDICINE                                                           | Wadsworth Center, New York State Department of Health                                            | Kirsten St. George, Daryl M. Lamson, Alexis Russel, Matthew Shudt, Melissa A Leisner, Jonathan Plitnick, Navjot Singh, John Kelly, Erasmus Schneider, Erica Lasek-Nesselquist                                        |
| EPI_ISL_861191                                                                                                                                                                                                                                 | NORTH SHORE UNIVERSITY HOSPITAL                                                                  | Wadsworth Center, New York State Department of Health                                            | Kirsten St. George, Daryl M. Lamson, Alexis Russel, Matthew Shudt, Melissa A Leisner, Jonathan Plitnick, Navjot Singh, John Kelly, Erasmus Schneider, Erica Lasek-Nesselquist                                        |
| EPI_ISL_861201, EPI_ISL_861208                                                                                                                                                                                                                 | URMC LABS                                                                                        | Wadsworth Center, New York State Department of Health                                            | Kirsten St. George, Daryl M. Lamson, Alexis Russel, Matthew Shudt, Melissa A Leisner, Jonathan Plitnick, Navjot Singh, John Kelly, Erasmus Schneider, Erica Lasek-Nesselquist                                        |
| EPI_ISL_861218, EPI_ISL_861228                                                                                                                                                                                                                 | BIO-REFERENCE LABORATORIES                                                                       | Wadsworth Center, New York State Department of Health                                            | Kirsten St. George, Daryl M. Lamson, Alexis Russel, Matthew Shudt, Melissa A Leisner, Jonathan Plitnick, Navjot Singh, John Kelly, Erasmus Schneider, Erica Lasek-Nesselquist                                        |
| EPI_ISL_861256, EPI_ISL_861265, EPI_ISL_861266, EPI_ISL_861272, EPI_ISL_861289, EPI_ISL_861290, EPI_ISL_861297, EPI_ISL_861308, EPI_ISL_861315, EPI_ISL_861318, EPI_ISL_861319, EPI_ISL_861320, EPI_ISL_861325, EPI_ISL_861328, EPI_ISL_861330 | MONTEFIORE MEDICAL CENTER LABORATORIES                                                           | Wadsworth Center, New York State Department of Health                                            | Kirsten St. George, Daryl M. Lamson, Alexis Russel, Matthew Shudt, Melissa A Leisner, Jonathan Plitnick, Navjot Singh, John Kelly, Erasmus Schneider, Erica Lasek-Nesselquist                                        |
| see above                                                                                                                                                                                                                                      |                                                                                                  |                                                                                                  |                                                                                                                                                                                                                      |
| EPI_ISL_861334, EPI_ISL_861345, EPI_ISL_861352, EPI_ISL_861354, EPI_ISL_861356, EPI_ISL_861360, EPI_ISL_861387, EPI_ISL_861393, EPI_ISL_861404                                                                                                 | WESTCHESTER MEDICAL CENTER                                                                       | Wadsworth Center, New York State Department of Health                                            | Kirsten St. George, Daryl M. Lamson, Alexis Russel, Matthew Shudt, Melissa A Leisner, Jonathan Plitnick, Navjot Singh, John Kelly, Erasmus Schneider, Erica Lasek-Nesselquist                                        |
| EPI_ISL_861414, EPI_ISL_861416                                                                                                                                                                                                                 | NORTH SHORE UNIVERSITY HOSPITAL                                                                  | Wadsworth Center, New York State Department of Health                                            | Kirsten St. George, Daryl M. Lamson, Alexis Russel, Matthew Shudt, Melissa A Leisner, Jonathan Plitnick, Navjot Singh, John Kelly, Erasmus Schneider, Erica Lasek-Nesselquist                                        |
| EPI_ISL_861946, EPI_ISL_862004                                                                                                                                                                                                                 | OHSU Lab Services Molecular Microbiology Lab                                                     | Oregon SARS-CoV-2 Genome Sequencing Center                                                       | Brendan L. O'Connell, Sally Grindstaff, Kayla Carter, Ruth V. Nichols, Alec J. Hirsch, Donna Hansel, Guang Fan, Xuan Qin, Daniel N. Streblov, William B. Messer, Andrew C. Adey, Benjamin N. Bimber, Brian J. O'Roak |
| EPI_ISL_862742, EPI_ISL_862750                                                                                                                                                                                                                 | Utah Public Health Laboratory, Utah Public Health Laboratory Infectious Disease submission group | Utah Public Health Laboratory, Utah Public Health Laboratory Infectious Disease submission group | Young,E.L., Oakeson,K.F., Gallagher,T.                                                                                                                                                                               |
| EPI_ISL_869189                                                                                                                                                                                                                                 | New Mexico Department of Health Scientific Laboratory                                            | Center for Global Health, University of New Mexico Health Sciences Center                        | Daryl Domman, Kurt Schwalm, Twila Kunde, Joseph Hicks, Anastacia Griego, Michael Edwards, Darrell Dinwiddie                                                                                                          |
| EPI_ISL_871970                                                                                                                                                                                                                                 | Wyoming Public Health Laboratory                                                                 | Wyoming Public Health Laboratory                                                                 | Noah Hull, Taylor Fearing, Lynette Gumbleton, Channing Weber, Ashley Norberg, Bailey Bowcutt, and Wanda Manley                                                                                                       |
| EPI_ISL_872408, EPI_ISL_872420, EPI_ISL_872465                                                                                                                                                                                                 | Eurofins Diatherix                                                                               | Hudsonalpha Genome Sequencing Center                                                             | Jane Grimwood, Melissa Williams, Lori H. Handley, Joshua Stough, Leslie Malone, Stefan Brzezinski, Ada Stewart, Teresa Jones, Jenell Webber, John Lovell, Jennifer Cart, and Jeremy Schmutz                          |
| EPI_ISL_872496, EPI_ISL_872506, EPI_ISL_872549, EPI_ISL_872564                                                                                                                                                                                 | New Mexico Department of Health Scientific Laboratory                                            | Center for Global Health, University of New Mexico Health Sciences Center                        | Daryl Domman, Kurt Schwalm, Twila Kunde, Joseph Hicks, Anastacia Griego, Michael Edwards, Darrell Dinwiddie                                                                                                          |
| EPI_ISL_872626                                                                                                                                                                                                                                 | Nigeria Centre for Disease Control (NCDC)                                                        | African Centre of Excellence for Genomics of Infectious Diseases (ACEGID), Redeemer's University | Oluniyi P.E. et al                                                                                                                                                                                                   |
| EPI_ISL_873116                                                                                                                                                                                                                                 | University of Michigan Clinical Microbiology Laboratory                                          | Lauring Lab, University of Michigan, Department of Microbiology and Immunology                   | Valesano                                                                                                                                                                                                             |
| EPI_ISL_873185                                                                                                                                                                                                                                 | Microbiology Division, South Carolina Department of Health and Environmental Control (SC DHEC)   | Microbiology Division, South Carolina Department of Health and Environmental Control (SC DHEC)   | Flores,H., Freeman,J.                                                                                                                                                                                                |
| EPI_ISL_873251, EPI_ISL_873253, EPI_ISL_873254, EPI_ISL_873265                                                                                                                                                                                 | M Health Fairview                                                                                | Minnesota Department of Health, Public Health Laboratory                                         | Alexandra Lorentz, Jacob Garfin, Matt Plumb, and Xiong Wang                                                                                                                                                          |
| EPI_ISL_875656                                                                                                                                                                                                                                 | Eurofins Diatherix                                                                               | Hudsonalpha Genome Sequencing Center                                                             | Jane Grimwood, Melissa Williams, Lori H. Handley, Joshua Stough, Leslie Malone, Stefan Brzezinski, Ada Stewart, Teresa Jones, Jenell Webber, John Lovell, Jennifer Cart, and Jeremy Schmutz                          |
| EPI_ISL_876049, EPI_ISL_876068, EPI_ISL_876086, EPI_ISL_876107, EPI_ISL_876112, EPI_ISL_876121, EPI_ISL_876138, EPI_ISL_876141, EPI_ISL_876234, EPI_ISL_876245, EPI_ISL_876302, EPI_ISL_876323, EPI_ISL_876325                                 | Massachusetts State Public Health Laboratory                                                     | Massachusetts State Public Health Laboratory                                                     | Andrew Lang, Timelia Fink, Glen Gallagher, Sandra Smole                                                                                                                                                              |
| see above                                                                                                                                                                                                                                      |                                                                                                  |                                                                                                  |                                                                                                                                                                                                                      |
| EPI_ISL_876724                                                                                                                                                                                                                                 | Helix/Illumina                                                                                   | Genomics and Discovery, Respiratory Viruses Branch,                                              | Peter W. Cook,Dhwani Batra,Ben L. Rambo-Martin,Eileen de Feo,Jan Antico,Christine Tran,Matthew Tolentino,Shannon Wickline,Kim Gietzen,Brad                                                                           |

|                                                                                                                                                                                                                                                                                                                                                                                                                                                                                                                                                                |                                                                                                                                                                                                                                                                                                                                                                                                                                                                                               |                                                                                                                                                                        |                                                                                                                                                                                                                                                                                                                                                                                                                                                                                                                                                                                                                                                                                                                                                                                                                                                               |
|----------------------------------------------------------------------------------------------------------------------------------------------------------------------------------------------------------------------------------------------------------------------------------------------------------------------------------------------------------------------------------------------------------------------------------------------------------------------------------------------------------------------------------------------------------------|-----------------------------------------------------------------------------------------------------------------------------------------------------------------------------------------------------------------------------------------------------------------------------------------------------------------------------------------------------------------------------------------------------------------------------------------------------------------------------------------------|------------------------------------------------------------------------------------------------------------------------------------------------------------------------|---------------------------------------------------------------------------------------------------------------------------------------------------------------------------------------------------------------------------------------------------------------------------------------------------------------------------------------------------------------------------------------------------------------------------------------------------------------------------------------------------------------------------------------------------------------------------------------------------------------------------------------------------------------------------------------------------------------------------------------------------------------------------------------------------------------------------------------------------------------|
|                                                                                                                                                                                                                                                                                                                                                                                                                                                                                                                                                                |                                                                                                                                                                                                                                                                                                                                                                                                                                                                                               | Division of Viral Diseases, Centers for Disease Control and Prevention                                                                                                 | Sickler,Jingtao Liu,Eric Allen,Phil Febbo,Summer Galloway,Nicole L. Washington,Simon White,Geraint Levan,Kelly Schiabor Barrett,Elizabeth Cirulli,Alexandre Bolze,Ary Ascencio,Charlotte Rivera-Garcia,Ryan Cho,Jason Nguyen,Sherry Wang,Jimmy Ramirez,Tyler Cassens,Efren Sandoval,Magnus Isaksson,William Lee,David Becker,Marc Laurent,James Lu,Clinton R. Paden,Suxiang Tong,Duncan MacCannell,                                                                                                                                                                                                                                                                                                                                                                                                                                                           |
| EPI_ISL_876737                                                                                                                                                                                                                                                                                                                                                                                                                                                                                                                                                 | Florida Bureau of Public Health Laboratories                                                                                                                                                                                                                                                                                                                                                                                                                                                  | Florida Bureau of Public Health Laboratories                                                                                                                           | Sarah Schmedes, Jason Blanton                                                                                                                                                                                                                                                                                                                                                                                                                                                                                                                                                                                                                                                                                                                                                                                                                                 |
| EPI_ISL_876827, EPI_ISL_876867, EPI_ISL_876872, EPI_ISL_876876                                                                                                                                                                                                                                                                                                                                                                                                                                                                                                 | Quest Diagnostics                                                                                                                                                                                                                                                                                                                                                                                                                                                                             | Quest Diagnostics                                                                                                                                                      | Rosenthal,S.H., Gerasimova,A., Kagan,R.M., Anderson, B., Hua, M., Liu Y., Bernstein, L.E., Livingston, K.E., Perez, A., Shalhout, D.F., Shlyakhter, I.A., Owen, R., Tanpaiboon, P., Lacbawan, F.                                                                                                                                                                                                                                                                                                                                                                                                                                                                                                                                                                                                                                                              |
| EPI_ISL_876989                                                                                                                                                                                                                                                                                                                                                                                                                                                                                                                                                 | 1.AO Universitaria 'S. Giovanni di Dio e Ruggi D'Aragona, Scuola Medica Salernitana' Hospital / 2.UOC di Virologia e Microbiologia, Università della Campania 'L. Vanvitelli' / 3.AO Universitaria 'Federico II' Napoli Hospital / 4.AORN 'San Giuseppe Moscati' Avellino Hospital / 5.AO 'San Pio - presidio G. Rummo' Benevento Hospital / 6.AO 'Sant'Anna e San Sebastiano' Caserta Hospital / 7.PO 'Maria Santissima Addolorata' Eboli Hospital / 8.Biogen Istituto di Ricerche Genetiche | 1. Genome Research Center for Health (CRGS) / 2. Laboratory of Molecular Medicine and Genomics(LMMGe) / 3. Center for Research in Pure and Applied Mathematics (CRMPA) | Giorgio Giurato (Corresponding Author), Francesca Rizzo (Corresponding Author), Alessandro Weisz (Corresponding Author), Gianluigi Franci, Giovanni Nassa, Pasquale Pagliano, Roberta Tarallo, Elena Alexandrova, Ylenia D'Agostino, Carlo Ferravante, Jessica Lambertini, Viola Melone, Domenico Memoli, Valeria Mirici Cappa, Domenico Palumbo, Giovanni Pecoraro, Assunta Sellitto, Oriana Strianese, Ilaria Terenzi, Giuseppe Fenza, Aniello Gentile, Antonello Saccomanno, Sonia Amabile, Teresa Rocco, Annamaria Salvati, Emilia Vaccaro, Massimiliano Galdiero, Michele Cennamo, Giuseppe Portella, Maria Grazia Foti, Mariarosaria Ingino, Maria Landi, Maurizio Fumi, Vincenzo Rocco, Rita Greco, Vittoria Letizia, Arnolfo Petruzzello, Maddalena Schioppa, Gregorio Goffredi, Francesca Marciano, Michele Caraglia, Alessia Cossu, Marianna Scrima |
| EPI_ISL_877143                                                                                                                                                                                                                                                                                                                                                                                                                                                                                                                                                 | Univeristy of New Mexico Hospital                                                                                                                                                                                                                                                                                                                                                                                                                                                             | Center for Global Health, University of New Mexico Health Sciences Center                                                                                              | Daryl Domman, Kurt Schwalm, Justin Bacca, Jon Fleming, Darrell Dinwiddie                                                                                                                                                                                                                                                                                                                                                                                                                                                                                                                                                                                                                                                                                                                                                                                      |
| EPI_ISL_877555                                                                                                                                                                                                                                                                                                                                                                                                                                                                                                                                                 | Institute of Microbiology, Universidad San Francisco de Quito                                                                                                                                                                                                                                                                                                                                                                                                                                 | Institute of Microbiology, Universidad San Francisco de Quito                                                                                                          | Belén Prado-Vivar, Sully Márquez, Juan José Guadalupe, Monica Becerra-Wong, Bernardo Gutiérrez, Kyllen Briones, Edmundo Encalada, Ninfa Hernandez, Francisco Cordova, Verónica Barragán, Patricio Rojas-Silva, Gabriel Trueba, Michelle Grunauer, Paúl Cárdenas                                                                                                                                                                                                                                                                                                                                                                                                                                                                                                                                                                                               |
| EPI_ISL_878170, EPI_ISL_878183, EPI_ISL_878276, EPI_ISL_878374, EPI_ISL_878398                                                                                                                                                                                                                                                                                                                                                                                                                                                                                 | San Diego County Public Health Laboratory                                                                                                                                                                                                                                                                                                                                                                                                                                                     | Andersen lab at Scripps Research                                                                                                                                       | SEARCH Alliance San Diego with Tracy Basler, Jovan Shephard, Brett Austin                                                                                                                                                                                                                                                                                                                                                                                                                                                                                                                                                                                                                                                                                                                                                                                     |
| EPI_ISL_878751                                                                                                                                                                                                                                                                                                                                                                                                                                                                                                                                                 | Lighthouse Lab in Milton Keynes                                                                                                                                                                                                                                                                                                                                                                                                                                                               | Wellcome Sanger Institute for the COVID-19 Genomics UK (COG-UK) Consortium                                                                                             | The Lighthouse Lab in Milton Keynes and Alex Alderton, Roberto Amato, Sonia Goncalves, Ewan Harrison, David K. Jackson, Ian Johnston, Dominic Kwiatkowski, Cordelia Langford, John Sillitoe on behalf of the Wellcome Sanger Institute COVID-19 Surveillance Team                                                                                                                                                                                                                                                                                                                                                                                                                                                                                                                                                                                             |
| EPI_ISL_878786                                                                                                                                                                                                                                                                                                                                                                                                                                                                                                                                                 | Rady's Childrens Hospital                                                                                                                                                                                                                                                                                                                                                                                                                                                                     | Andersen lab at Scripps Research                                                                                                                                       | SEARCH Alliance San Diego with Nanda Radamchar, David Dimmock, Linda Luo, Christina Clarke, Kathryn Boic, Teresa Mueller, Denise Malicki                                                                                                                                                                                                                                                                                                                                                                                                                                                                                                                                                                                                                                                                                                                      |
| EPI_ISL_879926, EPI_ISL_879942, EPI_ISL_879947, EPI_ISL_879953, EPI_ISL_879959, EPI_ISL_880017, EPI_ISL_880022                                                                                                                                                                                                                                                                                                                                                                                                                                                 | San Diego County Public Health Laboratory                                                                                                                                                                                                                                                                                                                                                                                                                                                     | Andersen lab at Scripps Research                                                                                                                                       | SEARCH Alliance San Diego with Tracy Basler, Jovan Shephard, Brett Austin                                                                                                                                                                                                                                                                                                                                                                                                                                                                                                                                                                                                                                                                                                                                                                                     |
| EPI_ISL_880165                                                                                                                                                                                                                                                                                                                                                                                                                                                                                                                                                 | Sharp HealthCare Laboratory                                                                                                                                                                                                                                                                                                                                                                                                                                                                   | Andersen lab at Scripps Research                                                                                                                                       | SEARCH Alliance San Diego with Aaron Harding, Jacquelyn Berumen, Cathy Woerle, Liam McGinnis, Art Mendoza, Omid Bakhtar                                                                                                                                                                                                                                                                                                                                                                                                                                                                                                                                                                                                                                                                                                                                       |
| EPI_ISL_880292                                                                                                                                                                                                                                                                                                                                                                                                                                                                                                                                                 | Scripps Medical Laboratory                                                                                                                                                                                                                                                                                                                                                                                                                                                                    | Andersen lab at Scripps Research                                                                                                                                       | SEARCH Alliance San Diego with Michael Quigley, Ellen Stefanski, Ian Mchardy                                                                                                                                                                                                                                                                                                                                                                                                                                                                                                                                                                                                                                                                                                                                                                                  |
| EPI_ISL_882661                                                                                                                                                                                                                                                                                                                                                                                                                                                                                                                                                 | Hospital de Santa Barbara de Goias                                                                                                                                                                                                                                                                                                                                                                                                                                                            | Instituto Adolfo Lutz, Interdisciplinary Procedures Center, Strategic Laboratory                                                                                       | Claudio Tavares Sacchi, Claudia Regina Gonçalves, Erica Valessa Ramos Gomes, Karoline Rodrigues Campos                                                                                                                                                                                                                                                                                                                                                                                                                                                                                                                                                                                                                                                                                                                                                        |
| EPI_ISL_883256, EPI_ISL_883262, EPI_ISL_883263, EPI_ISL_883272                                                                                                                                                                                                                                                                                                                                                                                                                                                                                                 | Eurofins Diatherix                                                                                                                                                                                                                                                                                                                                                                                                                                                                            | Hudsonalpha Genome Sequencing Center                                                                                                                                   | Jane Grimwood, Melissa Williams, Lori H. Handley, Joshua Stough, Leslie Malone, Stefan Brzezinski, Ada Stewart, Teresa Jones, Jenell Webber, John Lovell, Jennifer Cart, and Jeremy Schmutz                                                                                                                                                                                                                                                                                                                                                                                                                                                                                                                                                                                                                                                                   |
| EPI_ISL_883366                                                                                                                                                                                                                                                                                                                                                                                                                                                                                                                                                 | DOHMH Morrisania                                                                                                                                                                                                                                                                                                                                                                                                                                                                              | New York City Public Health Laboratory                                                                                                                                 | Jade Wang, et al.                                                                                                                                                                                                                                                                                                                                                                                                                                                                                                                                                                                                                                                                                                                                                                                                                                             |
| EPI_ISL_883405, EPI_ISL_883406                                                                                                                                                                                                                                                                                                                                                                                                                                                                                                                                 | OCME Office Of Chief Medical Examiner                                                                                                                                                                                                                                                                                                                                                                                                                                                         | New York City Public Health Laboratory                                                                                                                                 | Jade Wang, et al.                                                                                                                                                                                                                                                                                                                                                                                                                                                                                                                                                                                                                                                                                                                                                                                                                                             |
| EPI_ISL_883418                                                                                                                                                                                                                                                                                                                                                                                                                                                                                                                                                 | DOHMH Jamaica                                                                                                                                                                                                                                                                                                                                                                                                                                                                                 | New York City Public Health Laboratory                                                                                                                                 | Jade Wang, et al.                                                                                                                                                                                                                                                                                                                                                                                                                                                                                                                                                                                                                                                                                                                                                                                                                                             |
| EPI_ISL_883447, EPI_ISL_883482                                                                                                                                                                                                                                                                                                                                                                                                                                                                                                                                 | NORTHWELL HEALTH LABORATORIES                                                                                                                                                                                                                                                                                                                                                                                                                                                                 | Wadsworth Center, New York State Department of Health                                                                                                                  | Kirsten St. George, Daryl M. Lamson, Alexis Russel, Matthew Shudt, Melissa A Leisner, Jonathan Plitnick, Navjot Singh, John Kelly, Erasmus Schneider, Erica Lasek-Nesselquist                                                                                                                                                                                                                                                                                                                                                                                                                                                                                                                                                                                                                                                                                 |
| EPI_ISL_883530, EPI_ISL_883733                                                                                                                                                                                                                                                                                                                                                                                                                                                                                                                                 | Eurofins Diatherix                                                                                                                                                                                                                                                                                                                                                                                                                                                                            | Hudsonalpha Genome Sequencing Center                                                                                                                                   | Jane Grimwood, Melissa Williams, Lori H. Handley, Joshua Stough, Leslie Malone, Stefan Brzezinski, Ada Stewart, Teresa Jones, Jenell Webber, John Lovell, Jennifer Cart, and Jeremy Schmutz                                                                                                                                                                                                                                                                                                                                                                                                                                                                                                                                                                                                                                                                   |
| EPI_ISL_884025, EPI_ISL_884028, EPI_ISL_884029, EPI_ISL_884030, EPI_ISL_884031                                                                                                                                                                                                                                                                                                                                                                                                                                                                                 | ALBANY MEDICAL CENTER HOSPITAL CLINICAL LABORATORIES                                                                                                                                                                                                                                                                                                                                                                                                                                          | Wadsworth Center, New York State Department of Health                                                                                                                  | Kirsten St. George, Daryl M. Lamson, Alexis Russel, Matthew Shudt, Melissa A Leisner, Jonathan Plitnick, Navjot Singh, John Kelly, Erasmus Schneider, Erica Lasek-Nesselquist                                                                                                                                                                                                                                                                                                                                                                                                                                                                                                                                                                                                                                                                                 |
| EPI_ISL_884038                                                                                                                                                                                                                                                                                                                                                                                                                                                                                                                                                 | Wadsworth Center, New York State Department of Health                                                                                                                                                                                                                                                                                                                                                                                                                                         | Wadsworth Center, New York State Department of Health                                                                                                                  | Kirsten St. George, Daryl M. Lamson, Alexis Russel, Matthew Shudt, Melissa A Leisner, Jonathan Plitnick, Navjot Singh, John Kelly, Erasmus Schneider, Erica Lasek-Nesselquist                                                                                                                                                                                                                                                                                                                                                                                                                                                                                                                                                                                                                                                                                 |
| EPI_ISL_884046, EPI_ISL_884051, EPI_ISL_884052                                                                                                                                                                                                                                                                                                                                                                                                                                                                                                                 | ALBANY MEDICAL CENTER HOSPITAL CLINICAL LABORATORIES                                                                                                                                                                                                                                                                                                                                                                                                                                          | Wadsworth Center, New York State Department of Health                                                                                                                  | Kirsten St. George, Daryl M. Lamson, Alexis Russel, Matthew Shudt, Melissa A Leisner, Jonathan Plitnick, Navjot Singh, John Kelly, Erasmus Schneider, Erica Lasek-Nesselquist                                                                                                                                                                                                                                                                                                                                                                                                                                                                                                                                                                                                                                                                                 |
| EPI_ISL_884056                                                                                                                                                                                                                                                                                                                                                                                                                                                                                                                                                 | Wadsworth Center, New York State Department of Health                                                                                                                                                                                                                                                                                                                                                                                                                                         | Wadsworth Center, New York State Department of Health                                                                                                                  | Kirsten St. George, Daryl M. Lamson, Alexis Russel, Matthew Shudt, Melissa A Leisner, Jonathan Plitnick, Navjot Singh, John Kelly, Erasmus Schneider, Erica Lasek-Nesselquist                                                                                                                                                                                                                                                                                                                                                                                                                                                                                                                                                                                                                                                                                 |
| EPI_ISL_884069, EPI_ISL_884075, EPI_ISL_884078                                                                                                                                                                                                                                                                                                                                                                                                                                                                                                                 | ALBANY MEDICAL CENTER HOSPITAL CLINICAL LABORATORIES                                                                                                                                                                                                                                                                                                                                                                                                                                          | Wadsworth Center, New York State Department of Health                                                                                                                  | Kirsten St. George, Daryl M. Lamson, Alexis Russel, Matthew Shudt, Melissa A Leisner, Jonathan Plitnick, Navjot Singh, John Kelly, Erasmus Schneider, Erica Lasek-Nesselquist                                                                                                                                                                                                                                                                                                                                                                                                                                                                                                                                                                                                                                                                                 |
| EPI_ISL_884269                                                                                                                                                                                                                                                                                                                                                                                                                                                                                                                                                 | Institute of Medical Microbiology and Hospital Hygiene                                                                                                                                                                                                                                                                                                                                                                                                                                        | Institute of Medical Microbiology and Hospital Hygiene                                                                                                                 | Prof. Dr. Achim Kaasch, Aljoscha Tersteegen                                                                                                                                                                                                                                                                                                                                                                                                                                                                                                                                                                                                                                                                                                                                                                                                                   |
| EPI_ISL_884318, EPI_ISL_884349, EPI_ISL_884436                                                                                                                                                                                                                                                                                                                                                                                                                                                                                                                 | Infectious Diseases, Quest Diagnostics                                                                                                                                                                                                                                                                                                                                                                                                                                                        | Infectious Diseases, Quest Diagnostics                                                                                                                                 | Rosenthal,S.H., Gerasimova,A., Kagan,R.M., Anderson,B., Bernstein,L.E., Livingston,K.E., Hua,M., Liu,Y., Shalhout,D.F., Owen,R., Lacbawan,F.                                                                                                                                                                                                                                                                                                                                                                                                                                                                                                                                                                                                                                                                                                                  |
| EPI_ISL_884585, EPI_ISL_884652                                                                                                                                                                                                                                                                                                                                                                                                                                                                                                                                 | Respiratory Viruses Branch, Centers for Disease Control and Prevention                                                                                                                                                                                                                                                                                                                                                                                                                        | Respiratory Viruses Branch, Centers for Disease Control and Prevention                                                                                                 | Cook,P.W., Batra,D., Rambo-Martin,B.L., de Feo,E., Antico,J., Tran,C., Tolentino,M., Wickline,S., Gietzen,K., Sickler,B., Liu,J., Allen,E., Febbo,P., Galloway,S., Washington,N.L., White,S., Levan,G., Barret,K.S., Cirulli,E., Bolze,A., Ascencio,C., Rivera-Garcia,C., Cho,R., Nguyen,J., Wang,S., Ramirez,J., Cassens,T., Sandoval,E., Isaksson,M., Lee,W., Becker,D., Laurent,M., Lu,J., Paden,C.R., Tong,S., MacCannell,D.                                                                                                                                                                                                                                                                                                                                                                                                                              |
| EPI_ISL_884955                                                                                                                                                                                                                                                                                                                                                                                                                                                                                                                                                 | Santa Clara County Public Health Laboratory                                                                                                                                                                                                                                                                                                                                                                                                                                                   | Chan-Zuckerberg Biohub                                                                                                                                                 | CZB Ciliahub Consortium                                                                                                                                                                                                                                                                                                                                                                                                                                                                                                                                                                                                                                                                                                                                                                                                                                       |
| EPI_ISL_886188, EPI_ISL_886191, EPI_ISL_886216, EPI_ISL_886313, EPI_ISL_886400, EPI_ISL_886559, EPI_ISL_886766, EPI_ISL_886779, EPI_ISL_886788, EPI_ISL_886803, EPI_ISL_886867, EPI_ISL_886982, EPI_ISL_887013, EPI_ISL_887014, EPI_ISL_887018, EPI_ISL_887019, EPI_ISL_887022, EPI_ISL_887085                                                                                                                                                                                                                                                                 | Labcorp                                                                                                                                                                                                                                                                                                                                                                                                                                                                                       | Genomics and Discovery, Respiratory Viruses Branch, Division of Viral Diseases, Centers for Disease Control and Prevention                                             | Peter W. Cook,Dhwani Batra,Ben L. Rambo-Martin,Summer Galloway,Brian Krueger,Minoo Agarwal,Eyad Almasri,Debbie Boles,Ayla Burns,Nuthawin Charoensri,Oren Cohen,Susan Countryman,Mary Ann Cristobal,Bobbi Croy,Suzanne Dale,Hrushikesh Deshmukh,Amanda Douglas,Vincent Drouillon,Marcia Eisenberg,Howard Engler,Rama Ghatti,Prashant Gupta,Susan Hicks,Jake Humphrey,Lax Iyer,Manoj Jain,Mohan Kolli,Tim Kuphal,Stanley Letovsky,Michael Levandoski,Craig Lukasik,Jonathan Meltzer,Brian Norvell,Mindy Nye,Scott Parker,Christos Petropoulos,John Pruitt,Steven Ragan,Scott Ryan,Mike Sapeta,Jana Schroth,Suresh Babu Selvaraju,Goran Stevovic,Amanda Suchanek,Andrea Throop,Lyndon Tilson,Thomas Urban,Joe Voshell,Kimberly Wagner,Jonathan Williams,Mary Williamson,Qian Zeng,Tricia Zwielfhofer,Clinton R. Paden, Suxiang Tong,Duncan MacCannell,           |
| EPI_ISL_887518, EPI_ISL_887528                                                                                                                                                                                                                                                                                                                                                                                                                                                                                                                                 | Johns Hopkins Hospital Department of Pathology                                                                                                                                                                                                                                                                                                                                                                                                                                                | Johns Hopkins Hospital Department of Pathology                                                                                                                         | C. Paul Morris, Chun Hual Luo, Adannaya Amadi, Matthew Schwartz, Nicholas Gallagher, Heba H. Mostafa                                                                                                                                                                                                                                                                                                                                                                                                                                                                                                                                                                                                                                                                                                                                                          |
| EPI_ISL_887626, EPI_ISL_887627, EPI_ISL_887652, EPI_ISL_887751, EPI_ISL_887769, EPI_ISL_887996, EPI_ISL_887999, EPI_ISL_888008, EPI_ISL_888026, EPI_ISL_888069, EPI_ISL_888084, EPI_ISL_888149, EPI_ISL_888151, EPI_ISL_888153, EPI_ISL_888160, EPI_ISL_888176, EPI_ISL_888180, EPI_ISL_888197, EPI_ISL_888218, EPI_ISL_888244, EPI_ISL_888250, EPI_ISL_888276, EPI_ISL_888340, EPI_ISL_888357, EPI_ISL_888367, EPI_ISL_888381, EPI_ISL_888385, EPI_ISL_888392, EPI_ISL_888413, EPI_ISL_888454, EPI_ISL_888457, EPI_ISL_888460, EPI_ISL_888508, EPI_ISL_888577 | Labcorp                                                                                                                                                                                                                                                                                                                                                                                                                                                                                       | Genomics and Discovery, Respiratory Viruses Branch, Division of Viral Diseases, Centers for Disease Control and                                                        | Peter W. Cook,Dhwani Batra,Ben L. Rambo-Martin,Summer Galloway,Brian Krueger,Minoo Agarwal,Eyad Almasri,Debbie Boles,Ayla Burns,Nuthawin Charoensri,Oren Cohen,Susan Countryman,Mary Ann Cristobal,Bobbi Croy,Suzanne Dale,Hrushikesh Deshmukh,Amanda Douglas,Vincent                                                                                                                                                                                                                                                                                                                                                                                                                                                                                                                                                                                         |

## Prevention

|                                                                                                                                                                |                                                                          |                                                                                                                        |                                                                                                                                                                                                                                                                                                                                                                                                                                                                                                                                                                                                                                                                                                                                                   |
|----------------------------------------------------------------------------------------------------------------------------------------------------------------|--------------------------------------------------------------------------|------------------------------------------------------------------------------------------------------------------------|---------------------------------------------------------------------------------------------------------------------------------------------------------------------------------------------------------------------------------------------------------------------------------------------------------------------------------------------------------------------------------------------------------------------------------------------------------------------------------------------------------------------------------------------------------------------------------------------------------------------------------------------------------------------------------------------------------------------------------------------------|
|                                                                                                                                                                |                                                                          |                                                                                                                        | Drouillon,Marcia Eisenberg,Howard Engler,Rama Ghatti,Prashant Gupta,Susan Hicks,Jake Humphrey,Lax Iyer,Manoj Jain,Mohan Kolli,Tim Kuphal,Stanley Letovsky,Michael Levandoski,Craig Lukasik,Jonathan Meltzer,Brian Norvell,Mindy Nye,Scott Parker,Christos Petropoulos,John Pruitt,Steven Ragan,Scott Ryan,Mike Sapeta,Jana Schroth,Suresh Babu Selvaraju,Goran Stevovic,Amanda Suchanek,Andrea Throop,Lyndon Tilson,Thomas Urban,Joe Voshell,Kimberly Wagner,Jonathan Williams,Mary Williamson,Qian Zeng,Tricia Zwielfelhofer,Clinton R. Paden,Suxiang Tong,Duncan MacCannell,                                                                                                                                                                    |
| EPI_ISL_888620                                                                                                                                                 | Wyoming Public Health Laboratory                                         | Wyoming Public Health Laboratory                                                                                       | Noah Hull, Taylor Fearing, Lynette Gumbleton, Channing Weber, Ashley Norberg, Bailey Bowcutt, and Wanda Manley                                                                                                                                                                                                                                                                                                                                                                                                                                                                                                                                                                                                                                    |
| EPI_ISL_888642, EPI_ISL_888802, EPI_ISL_888803, EPI_ISL_888811                                                                                                 | Univeristy of New Mexico Hospital                                        | Center for Global Health, University of New Mexico Health Sciences Center                                              | Daryl Domman, Kurt Schwalm, Justin Bacca, Jon Femling, Darrell Dinwiddie                                                                                                                                                                                                                                                                                                                                                                                                                                                                                                                                                                                                                                                                          |
| EPI_ISL_888860                                                                                                                                                 | Michigan Department of Health and Human Services, Bureau of Laboratories | Michigan Department of Health and Human Services, Bureau of Laboratories                                               | Blankenship HM, Riner D, Soehnlén MK                                                                                                                                                                                                                                                                                                                                                                                                                                                                                                                                                                                                                                                                                                              |
| EPI_ISL_888935, EPI_ISL_888957                                                                                                                                 | Wyoming Public Health Laboratory                                         | Wyoming Public Health Laboratory                                                                                       | Noah Hull, Taylor Fearing, Lynette Gumbleton, Channing Weber, Ashley Norberg, Bailey Bowcutt, and Wanda Manley                                                                                                                                                                                                                                                                                                                                                                                                                                                                                                                                                                                                                                    |
| EPI_ISL_889164                                                                                                                                                 | Israel Central Virology laboratory                                       | Israel National Consortium for SARS-CoV-2 sequencing                                                                   | Neta Zuckerman, Efrat Dahan Bucris, Michal Mandelboim, Dana Bar-Ilan, Oran Erster, Tzvia Mann, Omer Murik, David A. Zeevi, Assaf Rokney, Joseph Jaffe, Eva Nachum, Maya Davidovich Cohen, Ephraim Fass, Gal Zizelski Valenci, Mor Rubinstein, Efrat Rorman, Israel Nissan, Efrat Glick-Saar, Omri Nayshool, Gideon Rechavi, Ella Mendelson, Orna Mor                                                                                                                                                                                                                                                                                                                                                                                              |
| EPI_ISL_889482                                                                                                                                                 | LSUHS Emerging Viral Threat Laboratory                                   | Microbial Genome Sequencing Center                                                                                     | Jeremy P. Kamil, Jennifer L. Carroll, Camille F. Abshire, Maarten Van Diest, Mohammed N.A. Siddiquey, Andrew D. Yurochko, Martin J. Sapp, Rona S. Scott, Christopher G. Kevil, Daniel J. Snyder, Vaughn S. Cooper, John A. Vanchiere                                                                                                                                                                                                                                                                                                                                                                                                                                                                                                              |
| EPI_ISL_890322                                                                                                                                                 | KU Leuven, Rega Institute, Clinical and Epidemiological Virology         | KU Leuven, Rega Institute, Clinical and Epidemiological Virology                                                       | Tony Wawina-Bokalanga, Bert Vanmechelen, Joan Marti-Carerras, Piet Maes                                                                                                                                                                                                                                                                                                                                                                                                                                                                                                                                                                                                                                                                           |
| EPI_ISL_890907                                                                                                                                                 | Seattle Flu Study                                                        | Seattle Flu Study                                                                                                      | Deborah A. Nickerson, Chris D. Frazar, Jover Lee, Benjamin Pelle, Erica Ryke, Matthew Richardson, Amanda Adler, Elisabeth Brandstetter, Peter D. Han, Kairsten Fay, Misja Ilcisin, Kirsten Lacombe, Thomas R. Sibley, Melissa Truong, Caitlin R. Wolf, Karen Cowgill, Stephanie Schrag, Jeff Duchin, Michael Boeckh, Janet A. Englund, Michael Famulare, Barry R. Lutz, Mark J. Rieder, Lea M. Starita, Matthew Thompson, Helen Y. Chu, Trevor Bedford, Jay Shendure                                                                                                                                                                                                                                                                              |
| EPI_ISL_891061, EPI_ISL_891071                                                                                                                                 | Seattle Flu Study                                                        | Seattle Flu Study                                                                                                      | Deborah A. Nickerson, Chris D. Frazar, Jover Lee, Benjamin Pelle, Erica Ryke, Matthew Richardson, Amanda Adler, Elisabeth Brandstetter, Peter D. Han, Kairsten Fay, Misja Ilcisin, Kirsten Lacombe, Thomas R. Sibley, Melissa Truong, Caitlin R. Wolf, Michael Boeckh, Janet A. Englund, Michael Famulare, Barry R. Lutz, Mark J. Rieder, Lea M. Starita, Matthew Thompson, Jay Shendure, Trevor Bedford, Helen Y. Chu                                                                                                                                                                                                                                                                                                                            |
| EPI_ISL_891119                                                                                                                                                 | Altius Institute for Biomedical Sciences                                 | Seattle Flu Study                                                                                                      | Deborah A. Nickerson, Chris D. Frazar, Jover Lee, Benjamin Pelle, Erica Ryke, Matthew Richardson, Amanda Adler, Elisabeth Brandstetter, Peter D. Han, Kairsten Fay, Misja Ilcisin, Kirsten Lacombe, Thomas R. Sibley, Melissa Truong, Caitlin R. Wolf, Ryan Alexander, Daniel Bates, Rebecca Bruders, Stephanie DeBaun, Clem Green, Muhammad Halimun, Kneshay Harper, Matt Hartman, Andrew Meuser, Alex Nguyen, Trung Nguyen, Sofia Olsson, Sadie Patraw, Hannah Petersen, Tobias Ragoczy, Joshua Richards, Jacob Rodriguez, John Stamatoyannopoulos, Julia Wald, Olivia Walther, Michael Boeckh, Janet A. Englund, Michael Famulare, Barry R. Lutz, Mark J. Rieder, Lea M. Starita, Matthew Thompson, Helen Y. Chu, Jay Shendure, Trevor Bedford |
| EPI_ISL_893733                                                                                                                                                 | Pima County Health Department                                            | Pathogen Discovery, Respiratory Viruses Branch, Division of Viral Diseases, Centers for Disease Control and Prevention | Yan Li, Anna Montmayeur, Ying Tao, Jing Zhang, Krista Queen, Anna Uehara, Brian Lynch, Rachel Marine, Peter Cook, Clinton R. Paden, Haibin Wang, Suxiang Tong                                                                                                                                                                                                                                                                                                                                                                                                                                                                                                                                                                                     |
| EPI_ISL_896216                                                                                                                                                 | Columbia University Irving Medical Center                                | Wadsworth Center, New York State Department of Health                                                                  | Kirsten St. George, Daryl M. Lamson, Alexis Russel, Matthew Shudt, Melissa A Leisner, Jonathan Plitnick, Navjot Singh, John Kelly, Erasmus Schneider, Erica Lasek-Nesselquist                                                                                                                                                                                                                                                                                                                                                                                                                                                                                                                                                                     |
| EPI_ISL_896220, EPI_ISL_896221, EPI_ISL_896222, EPI_ISL_896223, EPI_ISL_896224, EPI_ISL_896228                                                                 | SUNY UPSTATE MEDICAL UNIVERSITY                                          | Wadsworth Center, New York State Department of Health                                                                  | Kirsten St. George, Daryl M. Lamson, Alexis Russel, Matthew Shudt, Melissa A Leisner, Jonathan Plitnick, Navjot Singh, John Kelly, Erasmus Schneider, Erica Lasek-Nesselquist                                                                                                                                                                                                                                                                                                                                                                                                                                                                                                                                                                     |
| EPI_ISL_896232, EPI_ISL_896241, EPI_ISL_896244                                                                                                                 | Columbia University Irving Medical Center                                | Wadsworth Center, New York State Department of Health                                                                  | Kirsten St. George, Daryl M. Lamson, Alexis Russel, Matthew Shudt, Melissa A Leisner, Jonathan Plitnick, Navjot Singh, John Kelly, Erasmus Schneider, Erica Lasek-Nesselquist                                                                                                                                                                                                                                                                                                                                                                                                                                                                                                                                                                     |
| EPI_ISL_896251, EPI_ISL_896256, EPI_ISL_896257, EPI_ISL_896263, EPI_ISL_896266, EPI_ISL_896267, EPI_ISL_896273, EPI_ISL_896276, EPI_ISL_896290, EPI_ISL_896292 | SUNY UPSTATE MEDICAL UNIVERSITY                                          | Wadsworth Center, New York State Department of Health                                                                  | Kirsten St. George, Daryl M. Lamson, Alexis Russel, Matthew Shudt, Melissa A Leisner, Jonathan Plitnick, Navjot Singh, John Kelly, Erasmus Schneider, Erica Lasek-Nesselquist                                                                                                                                                                                                                                                                                                                                                                                                                                                                                                                                                                     |
| EPI_ISL_896295, EPI_ISL_896311, EPI_ISL_896315, EPI_ISL_896317, EPI_ISL_896321, EPI_ISL_896325, EPI_ISL_896331, EPI_ISL_896332, EPI_ISL_896336                 | MEMORIAL SLOAN KETTERING CANCER CENTER                                   | Wadsworth Center, New York State Department of Health                                                                  | Kirsten St. George, Daryl M. Lamson, Alexis Russel, Matthew Shudt, Melissa A Leisner, Jonathan Plitnick, Navjot Singh, John Kelly, Erasmus Schneider, Erica Lasek-Nesselquist                                                                                                                                                                                                                                                                                                                                                                                                                                                                                                                                                                     |
| EPI_ISL_896338                                                                                                                                                 | New York Presbyterian Hospital                                           | Wadsworth Center, New York State Department of Health                                                                  | Kirsten St. George, Daryl M. Lamson, Alexis Russel, Matthew Shudt, Melissa A Leisner, Jonathan Plitnick, Navjot Singh, John Kelly, Erasmus Schneider, Erica Lasek-Nesselquist                                                                                                                                                                                                                                                                                                                                                                                                                                                                                                                                                                     |
| EPI_ISL_896343, EPI_ISL_896344, EPI_ISL_896346                                                                                                                 | MEMORIAL SLOAN KETTERING CANCER CENTER                                   | Wadsworth Center, New York State Department of Health                                                                  | Kirsten St. George, Daryl M. Lamson, Alexis Russel, Matthew Shudt, Melissa A Leisner, Jonathan Plitnick, Navjot Singh, John Kelly, Erasmus Schneider, Erica Lasek-Nesselquist                                                                                                                                                                                                                                                                                                                                                                                                                                                                                                                                                                     |
| EPI_ISL_896360, EPI_ISL_896367                                                                                                                                 | New York Presbyterian Hospital                                           | Wadsworth Center, New York State Department of Health                                                                  | Kirsten St. George, Daryl M. Lamson, Alexis Russel, Matthew Shudt, Melissa A Leisner, Jonathan Plitnick, Navjot Singh, John Kelly, Erasmus Schneider, Erica Lasek-Nesselquist                                                                                                                                                                                                                                                                                                                                                                                                                                                                                                                                                                     |
| EPI_ISL_896396, EPI_ISL_896413                                                                                                                                 | URMC LABS                                                                | Wadsworth Center, New York State Department of Health                                                                  | Kirsten St. George, Daryl M. Lamson, Alexis Russel, Matthew Shudt, Melissa A Leisner, Jonathan Plitnick, Navjot Singh, John Kelly, Erasmus Schneider, Erica Lasek-Nesselquist                                                                                                                                                                                                                                                                                                                                                                                                                                                                                                                                                                     |
| EPI_ISL_896424, EPI_ISL_896426, EPI_ISL_896433, EPI_ISL_896434, EPI_ISL_896439                                                                                 | Columbia University Irving Medical Center                                | Wadsworth Center, New York State Department of Health                                                                  | Kirsten St. George, Daryl M. Lamson, Alexis Russel, Matthew Shudt, Melissa A Leisner, Jonathan Plitnick, Navjot Singh, John Kelly, Erasmus Schneider, Erica Lasek-Nesselquist                                                                                                                                                                                                                                                                                                                                                                                                                                                                                                                                                                     |
| EPI_ISL_896497                                                                                                                                                 | URMC LABS                                                                | Wadsworth Center, New York State Department of Health                                                                  | Kirsten St. George, Daryl M. Lamson, Alexis Russel, Matthew Shudt, Melissa A Leisner, Jonathan Plitnick, Navjot Singh, John Kelly, Erasmus Schneider, Erica Lasek-Nesselquist                                                                                                                                                                                                                                                                                                                                                                                                                                                                                                                                                                     |
| EPI_ISL_896498, EPI_ISL_896499                                                                                                                                 | MEMORIAL SLOAN KETTERING CANCER CENTER                                   | Wadsworth Center, New York State Department of Health                                                                  | Kirsten St. George, Daryl M. Lamson, Alexis Russel, Matthew Shudt, Melissa A Leisner, Jonathan Plitnick, Navjot Singh, John Kelly, Erasmus Schneider, Erica Lasek-Nesselquist                                                                                                                                                                                                                                                                                                                                                                                                                                                                                                                                                                     |
| EPI_ISL_896503, EPI_ISL_896508, EPI_ISL_896510, EPI_ISL_896514, EPI_ISL_896519                                                                                 | URMC LABS                                                                | Wadsworth Center, New York State Department of Health                                                                  | Kirsten St. George, Daryl M. Lamson, Alexis Russel, Matthew Shudt, Melissa A Leisner, Jonathan Plitnick, Navjot Singh, John Kelly, Erasmus Schneider, Erica Lasek-Nesselquist                                                                                                                                                                                                                                                                                                                                                                                                                                                                                                                                                                     |
| EPI_ISL_896520                                                                                                                                                 | MEMORIAL SLOAN KETTERING CANCER CENTER                                   | Wadsworth Center, New York State Department of Health                                                                  | Kirsten St. George, Daryl M. Lamson, Alexis Russel, Matthew Shudt, Melissa A Leisner, Jonathan Plitnick, Navjot Singh, John Kelly, Erasmus Schneider, Erica Lasek-Nesselquist                                                                                                                                                                                                                                                                                                                                                                                                                                                                                                                                                                     |
| EPI_ISL_896527, EPI_ISL_896528                                                                                                                                 | New York Presbyterian Hospital                                           | Wadsworth Center, New York State Department of Health                                                                  | Kirsten St. George, Daryl M. Lamson, Alexis Russel, Matthew Shudt, Melissa A Leisner, Jonathan Plitnick, Navjot Singh, John Kelly, Erasmus Schneider, Erica Lasek-Nesselquist                                                                                                                                                                                                                                                                                                                                                                                                                                                                                                                                                                     |
| EPI_ISL_896546, EPI_ISL_896547                                                                                                                                 | MEMORIAL SLOAN KETTERING CANCER CENTER                                   | Wadsworth Center, New York State Department of Health                                                                  | Kirsten St. George, Daryl M. Lamson, Alexis Russel, Matthew Shudt, Melissa A Leisner, Jonathan Plitnick, Navjot Singh, John Kelly, Erasmus Schneider, Erica Lasek-Nesselquist                                                                                                                                                                                                                                                                                                                                                                                                                                                                                                                                                                     |

|                                                                                                                                                |                                                                                                                |                                                                                                                            |                                                                                                                                                                                                                                                                                                                                                                                                                                                                                                                                                                                                                                                                                                                                                                   |
|------------------------------------------------------------------------------------------------------------------------------------------------|----------------------------------------------------------------------------------------------------------------|----------------------------------------------------------------------------------------------------------------------------|-------------------------------------------------------------------------------------------------------------------------------------------------------------------------------------------------------------------------------------------------------------------------------------------------------------------------------------------------------------------------------------------------------------------------------------------------------------------------------------------------------------------------------------------------------------------------------------------------------------------------------------------------------------------------------------------------------------------------------------------------------------------|
| EPI_ISL_896549, EPI_ISL_896550                                                                                                                 | New York Presbyterian Hospital                                                                                 | Wadsworth Center, New York State Department of Health                                                                      | Kirsten St. George, Daryl M. Lamson, Alexis Russel, Matthew Shudt, Melissa A Leisner, Jonathan Plitnick, Navjot Singh, John Kelly, Erasmus Schneider, Erica Lasek-Nesselquist                                                                                                                                                                                                                                                                                                                                                                                                                                                                                                                                                                                     |
| EPI_ISL_896552                                                                                                                                 | MEMORIAL SLOAN KETTERING CANCER CENTER                                                                         | Wadsworth Center, New York State Department of Health                                                                      | Kirsten St. George, Daryl M. Lamson, Alexis Russel, Matthew Shudt, Melissa A Leisner, Jonathan Plitnick, Navjot Singh, John Kelly, Erasmus Schneider, Erica Lasek-Nesselquist                                                                                                                                                                                                                                                                                                                                                                                                                                                                                                                                                                                     |
| EPI_ISL_896553                                                                                                                                 | New York Presbyterian Hospital                                                                                 | Wadsworth Center, New York State Department of Health                                                                      | Kirsten St. George, Daryl M. Lamson, Alexis Russel, Matthew Shudt, Melissa A Leisner, Jonathan Plitnick, Navjot Singh, John Kelly, Erasmus Schneider, Erica Lasek-Nesselquist                                                                                                                                                                                                                                                                                                                                                                                                                                                                                                                                                                                     |
| EPI_ISL_896562                                                                                                                                 | MEMORIAL SLOAN KETTERING CANCER CENTER                                                                         | Wadsworth Center, New York State Department of Health                                                                      | Kirsten St. George, Daryl M. Lamson, Alexis Russel, Matthew Shudt, Melissa A Leisner, Jonathan Plitnick, Navjot Singh, John Kelly, Erasmus Schneider, Erica Lasek-Nesselquist                                                                                                                                                                                                                                                                                                                                                                                                                                                                                                                                                                                     |
| EPI_ISL_902858                                                                                                                                 | Department of Virology and Immunology, University of Helsinki and Helsinki University Hospital, Huslab Finland | Department of Virology, Faculty of Medicine, University of Helsinki, Helsinki, Finland                                     | Teemu Smura, Ravi Kant, Phuoc Truong, Hussein Alburkat, Hannimari Kallio-Kokko, Jenni Virtanen, Maija Suvanto, Essi Korhonen, Sari Hannula, Harri Kangas, Hanna Liimatainen, Satu Kurkela, Hanna Jarva, Maija Lappalainen, Pekka Ellonen, Olli Vapalahti                                                                                                                                                                                                                                                                                                                                                                                                                                                                                                          |
| EPI_ISL_902925                                                                                                                                 | MD Laboratories                                                                                                | Los Angeles County PHL                                                                                                     | P. Hemarajata et al.                                                                                                                                                                                                                                                                                                                                                                                                                                                                                                                                                                                                                                                                                                                                              |
| EPI_ISL_902927, EPI_ISL_902945, EPI_ISL_902946                                                                                                 | Maryland Public Health Laboratory                                                                              | Maryland Public Health Laboratory                                                                                          | Maryland Department of Health Laboratories Administration                                                                                                                                                                                                                                                                                                                                                                                                                                                                                                                                                                                                                                                                                                         |
| EPI_ISL_903003, EPI_ISL_903065                                                                                                                 | Seattle Flu Study                                                                                              | Seattle Flu Study                                                                                                          | Deborah A. Nickerson, Chris D. Frazer, Jover Lee, Benjamin Pelle, Erica Ryke, Matthew Richardson, Amanda Adler, Elisabeth Brandstetter, Peter D. Han, Kairsten Fay, Misja Ilcisin, Kirsten Lacombe, Thomas R. Sibley, Melissa Truong, Caitlin R. Wolf, Michael Boeckh, Janet A. Englund, Michael Famulare, Barry R. Lutz, Mark J. Rieder, Lea M. Starita, Matthew Thompson, Jay Shendure, Trevor Bedford, Helen Y. Chu                                                                                                                                                                                                                                                                                                                                            |
| EPI_ISL_903214                                                                                                                                 | University of Michigan Clinical Microbiology Laboratory                                                        | Lauring Lab, University of Michigan, Department of Microbiology and Immunology                                             | Valesano                                                                                                                                                                                                                                                                                                                                                                                                                                                                                                                                                                                                                                                                                                                                                          |
| EPI_ISL_903287, EPI_ISL_903289                                                                                                                 | M Health Fairview                                                                                              | Minnesota Department of Health, Public Health Laboratory                                                                   | Alexandra Lorentz, Jacob Garfin, Matt Plumb, and Xiong Wang                                                                                                                                                                                                                                                                                                                                                                                                                                                                                                                                                                                                                                                                                                       |
| EPI_ISL_903550                                                                                                                                 | Quest Diagnostics                                                                                              | Quest Diagnostics                                                                                                          | Rosenthal,S.H., Gerasimova,A., Kagan,R.M., Anderson, B., Hua, M., Liu Y., Bernstein, L.E., Livingston, K.E., Perez, A., Shalhout, D.F., Shlyakhter, I.A., Owen, R., Tanpaiboon, P., Lacbawan, F.                                                                                                                                                                                                                                                                                                                                                                                                                                                                                                                                                                  |
| EPI_ISL_903626                                                                                                                                 | NM Dept. Health, Scientific Laboratory Division                                                                | Genomics and Discovery, Respiratory Viruses Branch, Division of Viral Diseases, Centers for Disease Control and Prevention | Krista Queen, Yan Li, Ying Tao, Jing Zhang, Anna Uehara, Anna Montmayeur, Clinton R. Paden, Peter W. Cook, Rachel Marine, Mili Sheth, Jasmine Padilla, Sarah Nobles, Mark Burroughs, Lori Rowe, Haibin Wang, Ben L. Rambo-Martin, Dhwani Batra, Justin Lee, Suxiang Tong                                                                                                                                                                                                                                                                                                                                                                                                                                                                                          |
| EPI_ISL_903633                                                                                                                                 | WA State Department of Health                                                                                  | Genomics and Discovery, Respiratory Viruses Branch, Division of Viral Diseases, Centers for Disease Control and Prevention | Krista Queen, Yan Li, Ying Tao, Jing Zhang, Anna Uehara, Anna Montmayeur, Clinton R. Paden, Peter W. Cook, Rachel Marine, Mili Sheth, Jasmine Padilla, Sarah Nobles, Mark Burroughs, Lori Rowe, Haibin Wang, Ben L. Rambo-Martin, Dhwani Batra, Justin Lee, Suxiang Tong                                                                                                                                                                                                                                                                                                                                                                                                                                                                                          |
| EPI_ISL_903704                                                                                                                                 | NJ Public Health and Environmental Laboratories                                                                | Genomics and Discovery, Respiratory Viruses Branch, Division of Viral Diseases, Centers for Disease Control and Prevention | Krista Queen, Yan Li, Ying Tao, Jing Zhang, Anna Uehara, Anna Montmayeur, Clinton R. Paden, Peter W. Cook, Rachel Marine, Mili Sheth, Jasmine Padilla, Sarah Nobles, Mark Burroughs, Lori Rowe, Haibin Wang, Ben L. Rambo-Martin, Dhwani Batra, Justin Lee, Suxiang Tong                                                                                                                                                                                                                                                                                                                                                                                                                                                                                          |
| EPI_ISL_903777                                                                                                                                 | NC State Laboratory of Public Health                                                                           | Genomics and Discovery, Respiratory Viruses Branch, Division of Viral Diseases, Centers for Disease Control and Prevention | Krista Queen, Yan Li, Ying Tao, Jing Zhang, Anna Uehara, Anna Montmayeur, Clinton R. Paden, Peter W. Cook, Rachel Marine, Mili Sheth, Jasmine Padilla, Sarah Nobles, Mark Burroughs, Lori Rowe, Haibin Wang, Ben L. Rambo-Martin, Dhwani Batra, Justin Lee, Suxiang Tong                                                                                                                                                                                                                                                                                                                                                                                                                                                                                          |
| EPI_ISL_903834                                                                                                                                 | PA Department of Health, Bureau of Laboratories                                                                | Genomics and Discovery, Respiratory Viruses Branch, Division of Viral Diseases, Centers for Disease Control and Prevention | Krista Queen, Yan Li, Ying Tao, Jing Zhang, Anna Uehara, Anna Montmayeur, Clinton R. Paden, Peter W. Cook, Rachel Marine, Mili Sheth, Jasmine Padilla, Sarah Nobles, Mark Burroughs, Lori Rowe, Haibin Wang, Ben L. Rambo-Martin, Dhwani Batra, Justin Lee, Suxiang Tong                                                                                                                                                                                                                                                                                                                                                                                                                                                                                          |
| EPI_ISL_903848                                                                                                                                 | MD DOH Laboratories Administration                                                                             | Genomics and Discovery, Respiratory Viruses Branch, Division of Viral Diseases, Centers for Disease Control and Prevention | Krista Queen, Yan Li, Ying Tao, Jing Zhang, Anna Uehara, Anna Montmayeur, Clinton R. Paden, Peter W. Cook, Rachel Marine, Mili Sheth, Jasmine Padilla, Sarah Nobles, Mark Burroughs, Lori Rowe, Haibin Wang, Ben L. Rambo-Martin, Dhwani Batra, Justin Lee, Suxiang Tong                                                                                                                                                                                                                                                                                                                                                                                                                                                                                          |
| EPI_ISL_903933                                                                                                                                 | PA Department of Health, Bureau of Laboratories                                                                | Genomics and Discovery, Respiratory Viruses Branch, Division of Viral Diseases, Centers for Disease Control and Prevention | Krista Queen, Yan Li, Ying Tao, Jing Zhang, Anna Uehara, Anna Montmayeur, Clinton R. Paden, Peter W. Cook, Rachel Marine, Mili Sheth, Jasmine Padilla, Sarah Nobles, Mark Burroughs, Lori Rowe, Haibin Wang, Ben L. Rambo-Martin, Dhwani Batra, Justin Lee, Suxiang Tong                                                                                                                                                                                                                                                                                                                                                                                                                                                                                          |
| EPI_ISL_904036, EPI_ISL_904037, EPI_ISL_904066, EPI_ISL_904080, EPI_ISL_904090, EPI_ISL_904096, EPI_ISL_904099                                 | New Mexico Department of Health Scientific Laboratory                                                          | New Mexico Department of Health Scientific Laboratory                                                                      | Elie Johnson, Anastacia Griego-Fisher, D'elra Malone                                                                                                                                                                                                                                                                                                                                                                                                                                                                                                                                                                                                                                                                                                              |
| EPI_ISL_905801, EPI_ISL_905804, EPI_ISL_905812, EPI_ISL_905825, EPI_ISL_905826, EPI_ISL_905849, EPI_ISL_905870, EPI_ISL_905904, EPI_ISL_905976 | OHSU Lab Services Molecular Microbiology Lab                                                                   | Oregon SARS-CoV-2 Genome Sequencing Center                                                                                 | Brendan L. O'Connell, Sally Grindstaff, Kayla Carter, Ruth V. Nichols, Alec J. Hirsch, Donna Hansel, Guang Fan, Xuan, Qin, Daniel N. Streblow, William B. Messer, Andrew C. Adey, Benjamin N. Bimber, Brian J. O'Roak                                                                                                                                                                                                                                                                                                                                                                                                                                                                                                                                             |
| EPI_ISL_906426, EPI_ISL_906450, EPI_ISL_906458                                                                                                 | Quest Diagnostics                                                                                              | Quest Diagnostics                                                                                                          | Rosenthal,S.H., Gerasimova,A., Kagan,R.M., Anderson, B., Hua, M., Liu Y., Bernstein, L.E., Livingston, K.E., Perez, A., Shalhout, D.F., Shlyakhter, I.A., Owen, R., Tanpaiboon, P., Lacbawan, F.                                                                                                                                                                                                                                                                                                                                                                                                                                                                                                                                                                  |
| EPI_ISL_906887                                                                                                                                 | Bureau of Public Health Laboratories, Florida Department of Health (BPHL, FLDOH)                               | Bureau of Public Health Laboratories, Florida Department of Health (BPHL, FLDOH)                                           | Schmedes,S., Blanton,J.                                                                                                                                                                                                                                                                                                                                                                                                                                                                                                                                                                                                                                                                                                                                           |
| EPI_ISL_906984, EPI_ISL_907067                                                                                                                 | Infectious Diseases, Quest Diagnostics                                                                         | Infectious Diseases, Quest Diagnostics                                                                                     | Rosenthal,S.H., Gerasimova,A., Kagan,R.M., Anderson,B., Bernstein,L.E., Livingston,K.E., Hua,M., Liu,Y., Shalhout,D.F., Owen,R., Lacbawan,F.                                                                                                                                                                                                                                                                                                                                                                                                                                                                                                                                                                                                                      |
| EPI_ISL_910205, EPI_ISL_910211, EPI_ISL_910212                                                                                                 | CSIR-Centre for Cellular and Molecular Biology                                                                 | CSIR-Centre for Cellular and Molecular Biology                                                                             | Payel Mukherjee,Pratheusa Maccha,Namami Gaur,Lamuk Zaveri,Tulasi Nagabandi,Purushotham Vodnala,Blessy B John,Viswagithe S L,B Himasri,Sofia Banu,Priya Singh,Archana Bharadwaj Siva,Karthik Bharadwaj Tallapaka,Rakesh K Mishra,Divya Tej Sowpati                                                                                                                                                                                                                                                                                                                                                                                                                                                                                                                 |
| EPI_ISL_911477                                                                                                                                 | Houston Health Dept.                                                                                           | Houston Health Dept.                                                                                                       | Ryker Penn, Pamela Brown, Adolpho Lara                                                                                                                                                                                                                                                                                                                                                                                                                                                                                                                                                                                                                                                                                                                            |
| EPI_ISL_911617                                                                                                                                 | Clinical Diagnostics Laboratory, Diagnostic & Experimental Pathology, Lilly Research Laboratories              | Clinical Diagnostics Laboratory, Diagnostic & Experimental Pathology, Lilly Research Laboratories                          | Tim Holzer, Mayuri Vaidya, Angie Fulford, Sam McNeely, Rachael Redmond, Phil Ebert, John Calley, Leslie O'Neill Reising, Pat Finnegan, Erin Wray, John McElwee, Jeff Fill, Joe Oakley, Andrew Schade                                                                                                                                                                                                                                                                                                                                                                                                                                                                                                                                                              |
| EPI_ISL_911833, EPI_ISL_911856, EPI_ISL_911861, EPI_ISL_911862, EPI_ISL_911876, EPI_ISL_911908                                                 | Johns Hopkins Hospital Department of Pathology                                                                 | Johns Hopkins Hospital Department of Pathology                                                                             | C. Paul Morris, Chun Hual Luo, Adannaya Amadi, Matthew Schwartz, Nicholas Gallagher, Heba H. Mostafa                                                                                                                                                                                                                                                                                                                                                                                                                                                                                                                                                                                                                                                              |
| EPI_ISL_912119, EPI_ISL_912140, EPI_ISL_912150                                                                                                 | Altius Institute for Biomedical Sciences                                                                       | Seattle Flu Study                                                                                                          | Deborah A. Nickerson, Chris D. Frazer, Jover Lee, Benjamin Pelle, Erica Ryke, Matthew Richardson, Amanda Adler, Elisabeth Brandstetter, Peter D. Han, Kairsten Fay, Misja Ilcisin, Kirsten Lacombe, Thomas R. Sibley, Melissa Truong, Caitlin R. Wolf, Ryan Alexander, Daniel Bates, Rebecca Bruders, Stephanie DeBaun, Clem Green, Muhammad Halimun, Jessica Halow, Kneshay Harper, Matt Hartman, Andrew Meuser, Alex Nguyen, Truong Nguyen, Sofia Olsson, Sadie Patraw, Hannah Petersen, Tobias Ragoczy, Joshua Richards, Jacob Rodriguez, John Stamatoyannopoulos, Julia Wald, Olivia Waltner, Michael Boeckh, Janet A. Englund, Michael Famulare, Barry R. Lutz, Mark J. Rieder, Lea M. Starita, Matthew Thompson, Helen Y. Chu, Jay Shendure, Trevor Bedford |
| EPI_ISL_912354                                                                                                                                 | Fondation Congolaise pour la recherche medicale (FCRM), Francine Ntoui                                         | NGS Competence Center Tuebingen, Institut für Medizinische Mikrobiologie und Hygiene, Universitaetsklinikum Tuebingen      | Angel Angelov                                                                                                                                                                                                                                                                                                                                                                                                                                                                                                                                                                                                                                                                                                                                                     |
| EPI_ISL_912517                                                                                                                                 | NHLS Universitas Academic                                                                                      | UFS Virology                                                                                                               | PA Bester, MM Nyaga, P Nthiga, MT Mogotsi, D Goedhals, T de Oliveira                                                                                                                                                                                                                                                                                                                                                                                                                                                                                                                                                                                                                                                                                              |

|                                                                                                                                |                                                                                                                                                                                                                                                                                                                                                                                                                                                                                               |                                                                                                                                                                        |                                                                                                                                                                                                                                                                                                                                                                                                                                                                                                                                                                                                                                                                                                                                                                                                                                                             |
|--------------------------------------------------------------------------------------------------------------------------------|-----------------------------------------------------------------------------------------------------------------------------------------------------------------------------------------------------------------------------------------------------------------------------------------------------------------------------------------------------------------------------------------------------------------------------------------------------------------------------------------------|------------------------------------------------------------------------------------------------------------------------------------------------------------------------|-------------------------------------------------------------------------------------------------------------------------------------------------------------------------------------------------------------------------------------------------------------------------------------------------------------------------------------------------------------------------------------------------------------------------------------------------------------------------------------------------------------------------------------------------------------------------------------------------------------------------------------------------------------------------------------------------------------------------------------------------------------------------------------------------------------------------------------------------------------|
| EPI_ISL_913200, EPI_ISL_913206                                                                                                 | University of Michigan Clinical Microbiology Laboratory                                                                                                                                                                                                                                                                                                                                                                                                                                       | Lauring Lab, University of Michigan, Department of Microbiology and Immunology                                                                                         | Valesano                                                                                                                                                                                                                                                                                                                                                                                                                                                                                                                                                                                                                                                                                                                                                                                                                                                    |
| EPI_ISL_913835                                                                                                                 | KU Leuven, Rega Institute, Clinical and Epidemiological Virology                                                                                                                                                                                                                                                                                                                                                                                                                              | KU Leuven, Rega Institute, Clinical and Epidemiological Virology                                                                                                       | Tony Wawina-Bokalanga, Bert Vanmechelen, Joan Marti-Carerras, Piet Maes                                                                                                                                                                                                                                                                                                                                                                                                                                                                                                                                                                                                                                                                                                                                                                                     |
| EPI_ISL_913892                                                                                                                 | TGen North                                                                                                                                                                                                                                                                                                                                                                                                                                                                                    | TGen North                                                                                                                                                             | "Jolene Bowers, Megan Folkerts, Chris French, Hayley Yaglom, Ashlyn Pfeiffer, Darrin Lemmer, Dave Engelthaler, The Arizona COVID Genomics Union (ACGU)"                                                                                                                                                                                                                                                                                                                                                                                                                                                                                                                                                                                                                                                                                                     |
| EPI_ISL_913929, EPI_ISL_913959, EPI_ISL_913962, EPI_ISL_913965, EPI_ISL_913972, EPI_ISL_913973, EPI_ISL_913977                 | Instituto de Diagnostico y Referencia Epidemiologicos INDRE_RNLSP                                                                                                                                                                                                                                                                                                                                                                                                                             | Instituto de Diagnostico y Referencia Epidemiologicos (INDRE)                                                                                                          | Claudia Wong-Arambula, Abril Rodriguez-Maldonado, Fabiola Garces-Ayala, Adnan Araiza-Rodriguez, David Fragofo-Fonseca, Sergio Rangel-Guerrero, Mayra Jimenez-Morales, Nancy Munoz-Hernandez, Natividad Cruz-Ortiz, Tatiana Nunez-Garcia, Gisela Barrera-Badillo, Lucia Hernandez-Rivas, Irma Lopez-Martinez, Ernesto Ramirez-Gonzalez.                                                                                                                                                                                                                                                                                                                                                                                                                                                                                                                      |
| EPI_ISL_914522                                                                                                                 | TGen North                                                                                                                                                                                                                                                                                                                                                                                                                                                                                    | TGen North                                                                                                                                                             | "Jolene Bowers, Megan Folkerts, Chris French, Hayley Yaglom, Ashlyn Pfeiffer, Darrin Lemmer, Dave Engelthaler, The Arizona COVID Genomics Union (ACGU)"                                                                                                                                                                                                                                                                                                                                                                                                                                                                                                                                                                                                                                                                                                     |
| EPI_ISL_914761, EPI_ISL_914779                                                                                                 | Wyoming Public Health Laboratory                                                                                                                                                                                                                                                                                                                                                                                                                                                              | Wyoming Public Health Laboratory                                                                                                                                       | Noah Hull, Taylor Fearing, Lynette Gumbleton, Channing Weber, Ashley Norberg, Bailey Bowcutt, and Wanda Manley                                                                                                                                                                                                                                                                                                                                                                                                                                                                                                                                                                                                                                                                                                                                              |
| EPI_ISL_914867                                                                                                                 | Kansas Health and Environmental Lab                                                                                                                                                                                                                                                                                                                                                                                                                                                           | Kansas Health and Environmental Lab                                                                                                                                    | Mike Grose, Paige Drury, Carissa Robertson, Ben Olsen, and Phil Adam                                                                                                                                                                                                                                                                                                                                                                                                                                                                                                                                                                                                                                                                                                                                                                                        |
| EPI_ISL_915313, EPI_ISL_915320                                                                                                 | Quest Diagnostics                                                                                                                                                                                                                                                                                                                                                                                                                                                                             | Quest Diagnostics                                                                                                                                                      | Rosenthal,S.H., Gerasimova,A., Kagan,R.M., Anderson, B., Hua, M., Liu Y., Bernstein, L.E., Livingston, K.E., Perez, A., Shalhout, D.F., Shlyakhter, I.A., Owen, R., Tanpaiboon, P., Lacbawan, F.                                                                                                                                                                                                                                                                                                                                                                                                                                                                                                                                                                                                                                                            |
| EPI_ISL_918458                                                                                                                 | 1.AO Universitaria 'S. Giovanni di Dio e Ruggi D'Aragona, Scuola Medica Salernitana' Hospital / 2.UOC di Virologia e Microbiologia, Università della Campania 'L. Vanvitelli' / 3.AO Universitaria 'Federico II' Napoli Hospital / 4.AORN 'San Giuseppe Moscati' Avellino Hospital / 5.AO 'San Pio - presidio G. Rummo' Benevento Hospital / 6.AO 'Sant'Anna e San Sebastiano' Caserta Hospital / 7.PO 'Maria Santissima Addolorata' Eboli Hospital / 8.Biogen Istituto di Ricerche Genetiche | 1. Genome Research Center for Health (CRGS) / 2. Laboratory of Molecular Medicine and Genomics(LMMGe) / 3. Center for Research in Pure and Applied Mathematics (CRMPA) | Giorgio Giurato (Corresponding Author), Francesca Rizzo (Corresponding Author), Alessandro Weisz (Corresponding Author), Gianluigi Franci, Giovanni Nassa, Pasquale Pagliano, Roberta Tarallo, Elena Alexandrova, Ylenia D'Agostino, Carlo Ferravante, Jessica Lamberti, Viola Melone, Domenico Memoli, Valeria Mirici Cappa, Domenico Palumbo, Giovanni Pecoraro, Assunta Sellitto, Oriana Strianese, Ilaria Terenzi, Giuseppe Fenza, Aniello Gentile, Antonello Saccomanno, Sonia Amabile, Teresa Rocco, Annamaria Salvati, Emilia Vaccaro, Massimiliano Galdiero, Michele Cennamo, Giuseppe Portella, Maria Grazia Foti, Mariarosaria Ingino, Maria Landi, Maurizio Fumi, Vincenzo Rocco, Rita Greco, Vittoria Letizia, Arnolfo Petruzzello, Maddalena Schioppa, Gregorio Goffredi, Francesca Marciano, Michele Caraglia, Alessia Cossu, Marianna Scrima |
| EPI_ISL_925171                                                                                                                 | Virginia DCLS                                                                                                                                                                                                                                                                                                                                                                                                                                                                                 | Virginia DCLS                                                                                                                                                          | Virginia DCLS                                                                                                                                                                                                                                                                                                                                                                                                                                                                                                                                                                                                                                                                                                                                                                                                                                               |
| EPI_ISL_929457                                                                                                                 | Department of Virus and Microbiological Special Diagnostics, Statens Serum Institut, Copenhagen, Denmark                                                                                                                                                                                                                                                                                                                                                                                      | Aalborg University                                                                                                                                                     | Danish Covid-19 Genome Consortium                                                                                                                                                                                                                                                                                                                                                                                                                                                                                                                                                                                                                                                                                                                                                                                                                           |
| EPI_ISL_930666                                                                                                                 | Utah Public Health Laboratory                                                                                                                                                                                                                                                                                                                                                                                                                                                                 | Utah Public Health Laboratory                                                                                                                                          | Erin L. Young, Kelly F. Oakeson, Tara Gallagher                                                                                                                                                                                                                                                                                                                                                                                                                                                                                                                                                                                                                                                                                                                                                                                                             |
| EPI_ISL_931469, EPI_ISL_931488, EPI_ISL_931504, EPI_ISL_931505                                                                 | Maryland Public Health Laboratory (MD PHL)                                                                                                                                                                                                                                                                                                                                                                                                                                                    | Maryland Public Health Laboratory (MD PHL)                                                                                                                             | Maryland Department of Health Laboratories Administration                                                                                                                                                                                                                                                                                                                                                                                                                                                                                                                                                                                                                                                                                                                                                                                                   |
| EPI_ISL_931583                                                                                                                 | Utah Public Health Laboratory                                                                                                                                                                                                                                                                                                                                                                                                                                                                 | Utah Public Health Laboratory                                                                                                                                          | Erin L. Young, Kelly F. Oakeson, Tara Gallagher                                                                                                                                                                                                                                                                                                                                                                                                                                                                                                                                                                                                                                                                                                                                                                                                             |
| EPI_ISL_933513, EPI_ISL_933522, EPI_ISL_933528                                                                                 | Instituto Nacional de Medicina Genomica                                                                                                                                                                                                                                                                                                                                                                                                                                                       | Instituto Nacional de Medicina Genomica                                                                                                                                | Hidalgo-Miranda A, Mendoza-Vargas A, Reyes-Grajeda JP, Cisneros-Villanueva M, Cedro-Tanda A,Peñaloza-Figueroa F, Herrera-Montalvo LA                                                                                                                                                                                                                                                                                                                                                                                                                                                                                                                                                                                                                                                                                                                        |
| EPI_ISL_933559, EPI_ISL_933560, EPI_ISL_933583, EPI_ISL_933601                                                                 | Arizona State Public Health Laboratory                                                                                                                                                                                                                                                                                                                                                                                                                                                        | Arizona State Public Health Laboratory                                                                                                                                 | Trung Huynh, Jessica Escobar, Katherine Fullerton, Nobuko Fukushima, Stacy White, Linda Getsinger, Victor Waddell                                                                                                                                                                                                                                                                                                                                                                                                                                                                                                                                                                                                                                                                                                                                           |
| EPI_ISL_933668, EPI_ISL_933682, EPI_ISL_933685, EPI_ISL_933689, EPI_ISL_933696, EPI_ISL_933697, EPI_ISL_933700, EPI_ISL_933701 | Instituto de Diagnostico y Referencia Epidemiologicos INDRE_RNLSP                                                                                                                                                                                                                                                                                                                                                                                                                             | Instituto de Diagnostico y Referencia Epidemiologicos (INDRE)                                                                                                          | Claudia Wong-Arambula, Abril Rodriguez-Maldonado, Fabiola Garces-Ayala, Adnan Araiza-Rodriguez, David Fragofo-Fonseca, Sergio Rangel-Guerrero, Mayra Jimenez-Morales, Nancy Munoz-Hernandez, Natividad Cruz-Ortiz, Tatiana Nunez-Garcia, Gisela Barrera-Badillo, Lucia Hernandez-Rivas, Irma Lopez-Martinez, Ernesto Ramirez-Gonzalez.                                                                                                                                                                                                                                                                                                                                                                                                                                                                                                                      |
| EPI_ISL_933739, EPI_ISL_933744, EPI_ISL_933753, EPI_ISL_933755, EPI_ISL_933757, EPI_ISL_933759                                 | DPHL                                                                                                                                                                                                                                                                                                                                                                                                                                                                                          | Delaware Public Health Lab                                                                                                                                             | Gregory Hovan                                                                                                                                                                                                                                                                                                                                                                                                                                                                                                                                                                                                                                                                                                                                                                                                                                               |
| EPI_ISL_935177                                                                                                                 | Wyoming Public Health Laboratory                                                                                                                                                                                                                                                                                                                                                                                                                                                              | Wyoming Public Health Laboratory                                                                                                                                       | Noah Hull, Taylor Fearing, Lynette Gumbleton, Channing Weber, Ashley Norberg, Bailey Bowcutt, and Wanda Manley                                                                                                                                                                                                                                                                                                                                                                                                                                                                                                                                                                                                                                                                                                                                              |
| EPI_ISL_935359, EPI_ISL_935363, EPI_ISL_935374, EPI_ISL_935449, EPI_ISL_935517                                                 | Florida Bureau of Public Health Laboratories                                                                                                                                                                                                                                                                                                                                                                                                                                                  | Florida Bureau of Public Health Laboratories                                                                                                                           | Sarah Schmedes, Jason Blanton                                                                                                                                                                                                                                                                                                                                                                                                                                                                                                                                                                                                                                                                                                                                                                                                                               |
| EPI_ISL_935614, EPI_ISL_935633                                                                                                 | Labo Analyses med                                                                                                                                                                                                                                                                                                                                                                                                                                                                             | National Reference Center for Viruses of Respiratory Infections, Institut Pasteur, Paris                                                                               | Marion Barbet, Sylvie Behillil, Méline Bizard, Angela Brisebarre, Camille Capel, Etienne Simon-Lorière, Vincent Enouf, Maud Vanpeene, Sylvie van der Werf,Amzalag Jonas                                                                                                                                                                                                                                                                                                                                                                                                                                                                                                                                                                                                                                                                                     |
| EPI_ISL_935731, EPI_ISL_935739, EPI_ISL_935742                                                                                 | Houston Health Dept.                                                                                                                                                                                                                                                                                                                                                                                                                                                                          | Houston Health Dept.                                                                                                                                                   | Ryker Penn, Pamela Brown, Adolpho Lara                                                                                                                                                                                                                                                                                                                                                                                                                                                                                                                                                                                                                                                                                                                                                                                                                      |
| EPI_ISL_935818, EPI_ISL_935820                                                                                                 | Cadham Provincial laboratory                                                                                                                                                                                                                                                                                                                                                                                                                                                                  | National Microbiology Laboratory (NML)                                                                                                                                 | Anna Majer, Shari Tyson, Grace Seo, Philip Mabon, Elsie Grudeski, Rhiannon Huzarewich, Russell Mandes, Anneliese Landgraff, Jennifer Tanner, Natalie Knox, Morag Graham, Gary Van Domselaar, Paul Van Caeselele, Jared Bullard, David Alexander, Kerry Dust, Nathalie Bastien, Yan Li, Timothy Booth, Darian Hole, Madison Chapel, Kirsten Biggar, CanCOGeN's metadata curation team, Public Health Agency of Canada CanCOGeN team                                                                                                                                                                                                                                                                                                                                                                                                                          |
| EPI_ISL_935974, EPI_ISL_935975, EPI_ISL_935982, EPI_ISL_935991                                                                 | GLENS FALLS HOSPITAL LABORATORY                                                                                                                                                                                                                                                                                                                                                                                                                                                               | Wadsworth Center, New York State Department of Health                                                                                                                  | Kirsten St. George, Daryl M. Lamson, Alexis Russel, Matthew Shudt, Melissa A Leisner, Jonathan Plitnick, Navjot Singh, John Kelly, Erasmus Schneider, Erica Lasek-Nesselquist                                                                                                                                                                                                                                                                                                                                                                                                                                                                                                                                                                                                                                                                               |
| EPI_ISL_935995, EPI_ISL_935999, EPI_ISL_936004, EPI_ISL_936005, EPI_ISL_936006, EPI_ISL_936011, EPI_ISL_936017                 | SUNY UPSTATE MEDICAL UNIVERSITY                                                                                                                                                                                                                                                                                                                                                                                                                                                               | Wadsworth Center, New York State Department of Health                                                                                                                  | Kirsten St. George, Daryl M. Lamson, Alexis Russel, Matthew Shudt, Melissa A Leisner, Jonathan Plitnick, Navjot Singh, John Kelly, Erasmus Schneider, Erica Lasek-Nesselquist                                                                                                                                                                                                                                                                                                                                                                                                                                                                                                                                                                                                                                                                               |
| EPI_ISL_936039, EPI_ISL_936042                                                                                                 | Columbia University Irving Medical Center                                                                                                                                                                                                                                                                                                                                                                                                                                                     | Wadsworth Center, New York State Department of Health                                                                                                                  | Kirsten St. George, Daryl M. Lamson, Alexis Russel, Matthew Shudt, Melissa A Leisner, Jonathan Plitnick, Navjot Singh, John Kelly, Erasmus Schneider, Erica Lasek-Nesselquist                                                                                                                                                                                                                                                                                                                                                                                                                                                                                                                                                                                                                                                                               |
| EPI_ISL_936054                                                                                                                 | ADIRONDACK MEDICAL CENTER                                                                                                                                                                                                                                                                                                                                                                                                                                                                     | Wadsworth Center, New York State Department of Health                                                                                                                  | Kirsten St. George, Daryl M. Lamson, Alexis Russel, Matthew Shudt, Melissa A Leisner, Jonathan Plitnick, Navjot Singh, John Kelly, Erasmus Schneider, Erica Lasek-Nesselquist                                                                                                                                                                                                                                                                                                                                                                                                                                                                                                                                                                                                                                                                               |
| EPI_ISL_936060, EPI_ISL_936061                                                                                                 | KALEIDA CENTER FOR LABORATORY MEDICINE                                                                                                                                                                                                                                                                                                                                                                                                                                                        | Wadsworth Center, New York State Department of Health                                                                                                                  | Kirsten St. George, Daryl M. Lamson, Alexis Russel, Matthew Shudt, Melissa A Leisner, Jonathan Plitnick, Navjot Singh, John Kelly, Erasmus Schneider, Erica Lasek-Nesselquist                                                                                                                                                                                                                                                                                                                                                                                                                                                                                                                                                                                                                                                                               |
| EPI_ISL_936064                                                                                                                 | Columbia University Irving Medical Center                                                                                                                                                                                                                                                                                                                                                                                                                                                     | Wadsworth Center, New York State Department of Health                                                                                                                  | Kirsten St. George, Daryl M. Lamson, Alexis Russel, Matthew Shudt, Melissa A Leisner, Jonathan Plitnick, Navjot Singh, John Kelly, Erasmus Schneider, Erica Lasek-Nesselquist                                                                                                                                                                                                                                                                                                                                                                                                                                                                                                                                                                                                                                                                               |
| EPI_ISL_936073, EPI_ISL_936101                                                                                                 | KALEIDA CENTER FOR LABORATORY MEDICINE                                                                                                                                                                                                                                                                                                                                                                                                                                                        | Wadsworth Center, New York State Department of Health                                                                                                                  | Kirsten St. George, Daryl M. Lamson, Alexis Russel, Matthew Shudt, Melissa A Leisner, Jonathan Plitnick, Navjot Singh, John Kelly, Erasmus Schneider, Erica Lasek-Nesselquist                                                                                                                                                                                                                                                                                                                                                                                                                                                                                                                                                                                                                                                                               |
| EPI_ISL_936103, EPI_ISL_936117, EPI_ISL_936118, EPI_ISL_936124, EPI_ISL_936129                                                 | WESTCHESTER MEDICAL CENTER                                                                                                                                                                                                                                                                                                                                                                                                                                                                    | Wadsworth Center, New York State Department of Health                                                                                                                  | Kirsten St. George, Daryl M. Lamson, Alexis Russel, Matthew Shudt, Melissa A Leisner, Jonathan Plitnick, Navjot Singh, John Kelly, Erasmus Schneider, Erica Lasek-Nesselquist                                                                                                                                                                                                                                                                                                                                                                                                                                                                                                                                                                                                                                                                               |

|                                                                                                                                                                                                                                                                                                                                |                                                                                                             |                                                                                                                        |                                                                                                                                                                                                                                                                                                                                                      |
|--------------------------------------------------------------------------------------------------------------------------------------------------------------------------------------------------------------------------------------------------------------------------------------------------------------------------------|-------------------------------------------------------------------------------------------------------------|------------------------------------------------------------------------------------------------------------------------|------------------------------------------------------------------------------------------------------------------------------------------------------------------------------------------------------------------------------------------------------------------------------------------------------------------------------------------------------|
| EPI_ISL_936137                                                                                                                                                                                                                                                                                                                 | New York Presbyterian Hospital                                                                              | Wadsworth Center, New York State Department of Health                                                                  | Kirsten St. George, Daryl M. Lamson, Alexis Russel, Matthew Shudt, Melissa A Leisner, Jonathan Plitnick, Navjot Singh, John Kelly, Erasmus Schneider, Erica Lasek-Nesselquist                                                                                                                                                                        |
| EPI_ISL_936140, EPI_ISL_936141                                                                                                                                                                                                                                                                                                 | THE MARY IMOGENE BASSETT HOSPITAL                                                                           | Wadsworth Center, New York State Department of Health                                                                  | Kirsten St. George, Daryl M. Lamson, Alexis Russel, Matthew Shudt, Melissa A Leisner, Jonathan Plitnick, Navjot Singh, John Kelly, Erasmus Schneider, Erica Lasek-Nesselquist                                                                                                                                                                        |
| EPI_ISL_936158, EPI_ISL_936179                                                                                                                                                                                                                                                                                                 | MEMORIAL SLOAN KETTERING CANCER CENTER                                                                      | Wadsworth Center, New York State Department of Health                                                                  | Kirsten St. George, Daryl M. Lamson, Alexis Russel, Matthew Shudt, Melissa A Leisner, Jonathan Plitnick, Navjot Singh, John Kelly, Erasmus Schneider, Erica Lasek-Nesselquist                                                                                                                                                                        |
| EPI_ISL_936213, EPI_ISL_936215, EPI_ISL_936239                                                                                                                                                                                                                                                                                 | Wadsworth Center, New York State Department of Health                                                       | Wadsworth Center, New York State Department of Health                                                                  | Kirsten St. George, Daryl M. Lamson, Alexis Russel, Matthew Shudt, Melissa A Leisner, Jonathan Plitnick, Navjot Singh, John Kelly, Erasmus Schneider, Erica Lasek-Nesselquist                                                                                                                                                                        |
| EPI_ISL_936255, EPI_ISL_936263, EPI_ISL_936268, EPI_ISL_936274, EPI_ISL_936282, EPI_ISL_936283, EPI_ISL_936298                                                                                                                                                                                                                 | MONTEFIORE MEDICAL CENTER LABORATORIES                                                                      | Wadsworth Center, New York State Department of Health                                                                  | Kirsten St. George, Daryl M. Lamson, Alexis Russel, Matthew Shudt, Melissa A Leisner, Jonathan Plitnick, Navjot Singh, John Kelly, Erasmus Schneider, Erica Lasek-Nesselquist                                                                                                                                                                        |
| EPI_ISL_936400, EPI_ISL_936401, EPI_ISL_936439, EPI_ISL_936451                                                                                                                                                                                                                                                                 | TGen North                                                                                                  | TGen North                                                                                                             | Jolene Bowers, Megan Folkerts, Chris French, Hayley Yaglom, Ashlyn Pfeiffer, Darrin Lemmer, Dave Engelthaler, The Arizona COVID Genomics Union (ACGU)                                                                                                                                                                                                |
| EPI_ISL_936610, EPI_ISL_936643, EPI_ISL_936664, EPI_ISL_936669, EPI_ISL_936683, EPI_ISL_936714, EPI_ISL_936750, EPI_ISL_936762, EPI_ISL_936768, EPI_ISL_936770, EPI_ISL_936801, EPI_ISL_936827, EPI_ISL_936833, EPI_ISL_936875, EPI_ISL_936889, EPI_ISL_936893, EPI_ISL_936904, EPI_ISL_936934, EPI_ISL_936977, EPI_ISL_936980 | Northwestern Memorial Hospital                                                                              | Ozer Lab                                                                                                               | Ramon Lorenzo-Redondo, Lacy M. Simons, Chad J. Achenbach, Lawrence J. Jennings, Michael G. Ison, Judd F. Hultquist, Egon A. Ozer                                                                                                                                                                                                                     |
| see above                                                                                                                                                                                                                                                                                                                      | Quest Diagnostics                                                                                           | Quest Diagnostics                                                                                                      | Rosenthal,S.H., Gerasimova,A., Kagan,R.M., Anderson, B., Livingston, K.E., Hua, M., Liu Y., Shalhout, D.F., Owen, R., Lacbawan, F.                                                                                                                                                                                                                   |
| EPI_ISL_937060, EPI_ISL_937102, EPI_ISL_937117                                                                                                                                                                                                                                                                                 | DOHMH Central Harlem                                                                                        | New York City Public Health Laboratory                                                                                 | Jade Wang, et al.                                                                                                                                                                                                                                                                                                                                    |
| EPI_ISL_937133                                                                                                                                                                                                                                                                                                                 | DOHMH Jamaica                                                                                               | New York City Public Health Laboratory                                                                                 | Jade Wang, et al.                                                                                                                                                                                                                                                                                                                                    |
| EPI_ISL_937222                                                                                                                                                                                                                                                                                                                 | Utah Public Health Laboratory                                                                               | Utah Public Health Laboratory                                                                                          | Erin L. Young, Kelly F. Oakeson, Tara Gallagher                                                                                                                                                                                                                                                                                                      |
| EPI_ISL_937338                                                                                                                                                                                                                                                                                                                 | Maine Health and Environmental Testing Laboratory (Maine HETL)                                              | Tewhey Lab, The Jackson Laboratory                                                                                     | Matluk,N., Dewey,H., Iosue,F., Barter,M., Lynch,R., Munger,H. and Tewhey,R.                                                                                                                                                                                                                                                                          |
| EPI_ISL_937391, EPI_ISL_937394                                                                                                                                                                                                                                                                                                 | Charlotte Maxeke Johannesburg Academic Hospital, National Health Laboratory Services, Gauteng, South Africa | National Institute for Communicable Diseases of the National Health Laboratory Service                                 | Amoako DG, Mohale T, Ntuli N, Mahlangu B, Allam M, Ismail A, Bhiman JN                                                                                                                                                                                                                                                                               |
| EPI_ISL_940081                                                                                                                                                                                                                                                                                                                 | Hôpital Bichat Claude Bernard, Laboratoire de Virologie                                                     | IAME UMR1137 Inserm, Université de Paris, Hôpital Bichat                                                               | Antoine Bridier-Nahmias, Amélie Recoing, Quentin Le Hingrat, Lena Daniel, Siham Hamri, Gilles Collin, Alexandre Storto, Mélanie Bertine, Charlotte Charpentier, Nadhira Houhou-Fidouh, Diane Descamps, Benoit Visseaux                                                                                                                               |
| EPI_ISL_940274, EPI_ISL_940542, EPI_ISL_940543                                                                                                                                                                                                                                                                                 | Hospital de Campanha para Enfrentamento do Coronavírus - Goiania                                            | Instituto Adolfo Lutz, Interdisciplinary Procedures Center, Strategic Laboratory                                       | Claudio Tavares Sacchi, Claudia Regina Gonçalves, Erica Valessa Ramos Gomes, Karoline Rodrigues Campos                                                                                                                                                                                                                                               |
| EPI_ISL_940612                                                                                                                                                                                                                                                                                                                 | Platform BIS UZA/UAntwerpen                                                                                 | UAntwerp, Laboratory of Medical Microbiology, Campus Drie Eiken S6.26, Universiteitsplein 1, 2610, Wilrijk, Belgium    | Basil Britto Xavier, Jasmine Coppens, Marie Le Mercier, Christine Lammens, Veerle Matheussen, Herman Goossens                                                                                                                                                                                                                                        |
| EPI_ISL_940779                                                                                                                                                                                                                                                                                                                 | Houston Health Dept.                                                                                        | Houston Health Dept.                                                                                                   | Ryker Penn, Pamela Brown, Adolpho Lara                                                                                                                                                                                                                                                                                                               |
| EPI_ISL_940815                                                                                                                                                                                                                                                                                                                 | Virginia DCLS                                                                                               | Virginia DCLS                                                                                                          | Virginia DCLS                                                                                                                                                                                                                                                                                                                                        |
| EPI_ISL_940825, EPI_ISL_940826, EPI_ISL_940827, EPI_ISL_940829                                                                                                                                                                                                                                                                 | Vaccines and Infectious Diseases Analytics Research Unit (VIDA)                                             | KRISP, KZN Research Innovation and Sequencing Platform                                                                 | Baillie Vicky, du Plessis Jeanine, Giandhari Jennifer, Pillay Sureshnee, Naidoo Yeshnee, Tegally Houriyah, de Oliveira Tulio, Madhi Shabir                                                                                                                                                                                                           |
| EPI_ISL_940864                                                                                                                                                                                                                                                                                                                 | Labo Analyses Med                                                                                           | National Reference Center for Viruses of Respiratory Infections, Institut Pasteur, Paris                               | Marion Barbet, Sylvie Behillil, Méline Bizard, Angela Brisebarre, Camille Capel, Etienne Simon-Lorière, Vincent Enouf, Maud Vanpeene, Sylvie van der Werf, Merah Kader                                                                                                                                                                               |
| EPI_ISL_941092                                                                                                                                                                                                                                                                                                                 | Nigeria Centre for Disease Control (NCDC)                                                                   | African Centre of Excellence for Genomics of Infectious Diseases (ACEGID), Redeemer's University                       | Oluniyi P.E. et al                                                                                                                                                                                                                                                                                                                                   |
| EPI_ISL_941296                                                                                                                                                                                                                                                                                                                 | New Mexico Department of Health Scientific Laboratory                                                       | New Mexico Department of Health Scientific Laboratory                                                                  | Ellie Johnson, Anastacia Griego-Fisher, D'eldra Malone, Jennifer Benoit                                                                                                                                                                                                                                                                              |
| EPI_ISL_941304, EPI_ISL_941329                                                                                                                                                                                                                                                                                                 | Virginia DCLS                                                                                               | Virginia DCLS                                                                                                          | Virginia DCLS                                                                                                                                                                                                                                                                                                                                        |
| EPI_ISL_941918, EPI_ISL_941919                                                                                                                                                                                                                                                                                                 | Wisconsin State Laboratory of Hygiene Communicable Disease Division                                         | Wisconsin State Laboratory of Hygiene Communicable Disease Division                                                    | Kelsey R. Florek, Abigail C. Shockey                                                                                                                                                                                                                                                                                                                 |
| EPI_ISL_942119, EPI_ISL_942152, EPI_ISL_942220, EPI_ISL_942222                                                                                                                                                                                                                                                                 | Gundersen Molecular Diagnostics Laboratory                                                                  | Kabara Cancer Research Institute                                                                                       | Craig S. Richmond, Paraic A. Kenny                                                                                                                                                                                                                                                                                                                   |
| EPI_ISL_942677, EPI_ISL_942704, EPI_ISL_942743, EPI_ISL_942820                                                                                                                                                                                                                                                                 | Utah Public Health Laboratory                                                                               | Utah Public Health Laboratory                                                                                          | Erin L. Young, Kelly F. Oakeson, Tara Gallagher                                                                                                                                                                                                                                                                                                      |
| EPI_ISL_943709, EPI_ISL_943920, EPI_ISL_943953, EPI_ISL_943957                                                                                                                                                                                                                                                                 | Israel Central Virology laboratory                                                                          | Israel National Consortium for SARS-CoV-2 sequencing                                                                   | Neta Zuckerman, Efrat Dahan Bucris, Michal Mandelboim, Dana Bar-Ilan, Oran Erster, Tzvia Mann, Omer Murik, David A. Zeevi, Assaf Rokney, Joseph Jaffe, Eva Nachum, Maya Davidovich Cohen, Ephraim Fass, Gal Zizelski Valenci, Mor Rubinstein, Efrat Rorman, Israel Nissan, Efrat Glick-Saar, Omri Nayshool, Gideon Rechavi, Ella Mendelson, Orna Mor |
| EPI_ISL_944296                                                                                                                                                                                                                                                                                                                 | Instituto Nacional de Medicina Genomica                                                                     | Instituto Nacional de Medicina Genomica                                                                                | Hidalgo-Miranda A, Mendoza-Vargas A, Reyes-Grajeda JP, Cisneros-Villanueva M, Cedro-Tanda A,Peñaloza-Figueroa F, Herrera-Montalvo LA                                                                                                                                                                                                                 |
| EPI_ISL_944623                                                                                                                                                                                                                                                                                                                 | University Hospitals of Geneva, Laboratory of Virology                                                      | HUG, Laboratory of Virology and the Health2030 Genome Center                                                           | Samuel Cordey, Ana Rita Goncalves, Laurent Kaiser, Lorenzo Cerutti, Henri Pegeot, Melyssa Elies, Deborah Penet, Keith Harshman, Ioannis Xenarios, Emmanouil Dermitzakis                                                                                                                                                                              |
| EPI_ISL_953765                                                                                                                                                                                                                                                                                                                 | Colorado Department of Public Health and Environment                                                        | Colorado Department of Puplic Health and Environment                                                                   | Laura Bankers, Molly C. Hetherington-Rauth, Diana Ir, Shannon Ely, Shannon R. Matzinger, Sarah Elizabeth Totten, Emily A. Travanty                                                                                                                                                                                                                   |
| EPI_ISL_954822, EPI_ISL_954877, EPI_ISL_954952, EPI_ISL_954955, EPI_ISL_955046, EPI_ISL_955056                                                                                                                                                                                                                                 | Instituto Nacional de Medicina Genomica                                                                     | Instituto Nacional de Medicina Genomica                                                                                | Hidalgo-Miranda A, Mendoza-Vargas A, Reyes-Grajeda JP, Cisneros-Villanueva M, Cedro-Tanda A,Peñaloza-Figueroa F, Herrera-Montalvo LA                                                                                                                                                                                                                 |
| EPI_ISL_955198, EPI_ISL_955203                                                                                                                                                                                                                                                                                                 | AR Dept. of Health-PHL, Molecular Diagnostics                                                               | Pathogen Discovery, Respiratory Viruses Branch, Division of Viral Diseases, Centers for Disease Control and Prevention | Ying Tao, Jing Zhang, Yan Li, Krista Queen, Anna Uehara, Peter Cook, Clinton R. Paden, Haibin Wang, Suxiang Tong                                                                                                                                                                                                                                     |
| EPI_ISL_955272                                                                                                                                                                                                                                                                                                                 | Servicio de Microbiología, Hospital Universitario Son Espases                                               | SeqCOVID-SPAIN consortium/IBV(CSIC)                                                                                    | Carla López-Causapé, Jordi Reina, Antonio Oliver and SeqCOVID-SPAIN consortium                                                                                                                                                                                                                                                                       |
| EPI_ISL_959443                                                                                                                                                                                                                                                                                                                 | University of Wisconsin-Madison AIDS Vaccine Research Laboratories                                          | University of Wisconsin-Madison AIDS Vaccine Research Laboratories                                                     | Gage Moreno, Katarina Braun, et al. AIDS Vaccine Research Laboratories                                                                                                                                                                                                                                                                               |
| EPI_ISL_960335                                                                                                                                                                                                                                                                                                                 | Delaware Public Health Laboratory                                                                           | Delaware Public Health Lab                                                                                             | Gregory Hovan                                                                                                                                                                                                                                                                                                                                        |
| EPI_ISL_961126                                                                                                                                                                                                                                                                                                                 | Michigan Department of Health and Human Services, Bureau of Laboratories                                    | Michigan Department of Health and Human Services, Bureau of Laboratories                                               | Blankenship HM, Riner D, Soehnlen MK                                                                                                                                                                                                                                                                                                                 |
| EPI_ISL_961480                                                                                                                                                                                                                                                                                                                 | Hôpital Georges L. Dumont                                                                                   | National Microbiology Laboratory (NML)                                                                                 | Anna Majer, Shari Tyson, Grace Seo, Philip Mabon, Elsie Grudeski, Rhiannon Huzarewich, Russell Mandes, Anneliese Landgraff, Jennifer Tanner, Natalie Knox, Morag Graham, Gary Van Domselaar, Richard Garceau, Guillaume Desnoyers, Nathalie Bastien, Yan Li, Timothy Booth, Darian Hole, Madison                                                     |
| EPI_ISL_961609                                                                                                                                                                                                                                                                                                                 |                                                                                                             |                                                                                                                        |                                                                                                                                                                                                                                                                                                                                                      |

|                                                                                                                                                                                                                                                                                                                                                                                                                                                                                                                                                                |                                                                          |                                                                                                    |                                                                                                                                                                                                                                                                                                                                                                                                                                                                                                                                                                                                                                                                                                                                                                    |
|----------------------------------------------------------------------------------------------------------------------------------------------------------------------------------------------------------------------------------------------------------------------------------------------------------------------------------------------------------------------------------------------------------------------------------------------------------------------------------------------------------------------------------------------------------------|--------------------------------------------------------------------------|----------------------------------------------------------------------------------------------------|--------------------------------------------------------------------------------------------------------------------------------------------------------------------------------------------------------------------------------------------------------------------------------------------------------------------------------------------------------------------------------------------------------------------------------------------------------------------------------------------------------------------------------------------------------------------------------------------------------------------------------------------------------------------------------------------------------------------------------------------------------------------|
|                                                                                                                                                                                                                                                                                                                                                                                                                                                                                                                                                                |                                                                          |                                                                                                    | Chapel, Kirsten Biggar, CanCOGeN's metadata curation team, Public Health Agency of Canada CanCOGeN team                                                                                                                                                                                                                                                                                                                                                                                                                                                                                                                                                                                                                                                            |
| EPI_ISL_961759                                                                                                                                                                                                                                                                                                                                                                                                                                                                                                                                                 | Viral Respiratory Lab, National Institute for Biomedical Research (INRB) | Pathogen Sequencing Lab, National Institute for Biomedical Research (INRB)                         | Placide Mbala-Kingebeni, Edith Nkwembe, Eddy Kinganda-Lusamaki, Amuri Aziza, Francisca Muyembe Mawete, Emmanuel Lokilo Lokilo, Jean-Claude Makangara Cigolo, Catherine Pratt, Matthias Pauthner, Josh Quick, Allison Black, James Hadfield, Trevor Bedford, Ian Goodfellow, Andrew Rambaut, Nick Loman, Kristian Andersen, Michael Wiley, Steve Ahuka-Mundeke, Jean-Jacques Muyembe Tamfum                                                                                                                                                                                                                                                                                                                                                                         |
| EPI_ISL_961906, EPI_ISL_961968                                                                                                                                                                                                                                                                                                                                                                                                                                                                                                                                 | Illinois Department of Public Health                                     | Gagnon Lab, Southern Illinois University                                                           | Keith Gagnon                                                                                                                                                                                                                                                                                                                                                                                                                                                                                                                                                                                                                                                                                                                                                       |
| EPI_ISL_962234, EPI_ISL_962249, EPI_ISL_962251, EPI_ISL_962258                                                                                                                                                                                                                                                                                                                                                                                                                                                                                                 | Seattle Flu Study                                                        | Seattle Flu Study                                                                                  | Deborah A. Nickerson, Chris D. Frazar, Jover Lee, Benjamin Pelle, Erica Ryke, Matthew Richardson, Amanda Adler, Elisabeth Brandstetter, Peter D. Han, Kairsten Fay, Misja Ilicisin, Kirsten Lacombe, Thomas R. Sibley, Melissa Truong, Caitlin R. Wolf, Karen Cowgill, Stephanie Schrag, Jeff Duchin, Michael Boeckh, Janet A. Englund, Michael Famulare, Barry R. Lutz, Mark J. Rieder, Lea M. Starita, Matthew Thompson, Helen Y. Chu, Trevor Bedford, Jay Shendure                                                                                                                                                                                                                                                                                              |
| EPI_ISL_962301                                                                                                                                                                                                                                                                                                                                                                                                                                                                                                                                                 | Seattle Flu Study                                                        | Seattle Flu Study                                                                                  | Deborah A. Nickerson, Chris D. Frazar, Jover Lee, Benjamin Pelle, Erica Ryke, Matthew Richardson, Amanda Adler, Elisabeth Brandstetter, Peter D. Han, Kairsten Fay, Misja Ilicisin, Kirsten Lacombe, Thomas R. Sibley, Melissa Truong, Caitlin R. Wolf, Michael Boeckh, Janet A. Englund, Michael Famulare, Barry R. Lutz, Mark J. Rieder, Lea M. Starita, Matthew Thompson, Jay Shendure, Trevor Bedford, Helen Y. Chu                                                                                                                                                                                                                                                                                                                                            |
| EPI_ISL_962308, EPI_ISL_962362                                                                                                                                                                                                                                                                                                                                                                                                                                                                                                                                 | Altius Institute for Biomedical Sciences                                 | Seattle Flu Study                                                                                  | Deborah A. Nickerson, Chris D. Frazar, Jover Lee, Benjamin Pelle, Erica Ryke, Matthew Richardson, Amanda Adler, Elisabeth Brandstetter, Peter D. Han, Kairsten Fay, Misja Ilicisin, Kirsten Lacombe, Thomas R. Sibley, Melissa Truong, Caitlin R. Wolf, Ryan Alexander, Daniel Bates, Rebecca Bruders, Stephanie DeBaun, Clem Green, Muhammad Halimun, Jessica Halow, Kneshay Harper, Matt Hartman, Andrew Meuser, Alex Nguyen, Truong Nguyen, Sofia Olsson, Sadie Patraw, Hannah Petersen, Tobias Ragoczy, Joshua Richards, Jacob Rodriguez, John Stamatoyannopoulos, Julia Wald, Olivia Waltner, Michael Boeckh, Janet A. Englund, Michael Famulare, Barry R. Lutz, Mark J. Rieder, Lea M. Starita, Matthew Thompson, Helen Y. Chu, Jay Shendure, Trevor Bedford |
| EPI_ISL_962376, EPI_ISL_962465, EPI_ISL_962478                                                                                                                                                                                                                                                                                                                                                                                                                                                                                                                 | Seattle Flu Study                                                        | Seattle Flu Study                                                                                  | Deborah A. Nickerson, Chris D. Frazar, Jover Lee, Benjamin Pelle, Erica Ryke, Matthew Richardson, Amanda Adler, Elisabeth Brandstetter, Peter D. Han, Kairsten Fay, Misja Ilicisin, Kirsten Lacombe, Thomas R. Sibley, Melissa Truong, Caitlin R. Wolf, Karen Cowgill, Stephanie Schrag, Jeff Duchin, Michael Boeckh, Janet A. Englund, Michael Famulare, Barry R. Lutz, Mark J. Rieder, Lea M. Starita, Matthew Thompson, Helen Y. Chu, Trevor Bedford, Jay Shendure                                                                                                                                                                                                                                                                                              |
| EPI_ISL_964527                                                                                                                                                                                                                                                                                                                                                                                                                                                                                                                                                 | Lighthouse Lab in Glasgow                                                | Wellcome Sanger Institute for the COVID-19 Genomics UK (COG-UK) Consortium                         | Harper VanSteenhouse, Yumi Kasai, David Gray, Carol Clugston, Anna Dominiczak and Alex Alderton, Roberto Amato, Sonia Goncalves, Ewan Harrison, David K. Jackson, Ian Johnston, Dominic Kwiatkowski, Cordelia Langford, John Sillitoe on behalf of the Wellcome Sanger Institute COVID-19 Surveillance Team                                                                                                                                                                                                                                                                                                                                                                                                                                                        |
| EPI_ISL_965084, EPI_ISL_965102, EPI_ISL_965105, EPI_ISL_965112                                                                                                                                                                                                                                                                                                                                                                                                                                                                                                 | Wyoming Public Health Laboratory                                         | Wyoming Public Health Laboratory                                                                   | Noah Hull, Taylor Fearing, Lynette Gumbleton, Channing Weber, Ashley Norberg, Bailey Bowcutt, and Wanda Manley                                                                                                                                                                                                                                                                                                                                                                                                                                                                                                                                                                                                                                                     |
| EPI_ISL_965842, EPI_ISL_965848, EPI_ISL_965850                                                                                                                                                                                                                                                                                                                                                                                                                                                                                                                 | GA Department of Public Health                                           | GA Department of Public Health                                                                     | Stacy Reeves, Jonathan Edwards, Cynthia Dixey, Tonia Parrott                                                                                                                                                                                                                                                                                                                                                                                                                                                                                                                                                                                                                                                                                                       |
| EPI_ISL_965896                                                                                                                                                                                                                                                                                                                                                                                                                                                                                                                                                 | Massachusetts State Public Health Laboratory                             | Massachusetts State Public Health Laboratory                                                       | Andrew Lang, Timelia Fink, Glen Gallagher, Sandra Smole                                                                                                                                                                                                                                                                                                                                                                                                                                                                                                                                                                                                                                                                                                            |
| EPI_ISL_965980                                                                                                                                                                                                                                                                                                                                                                                                                                                                                                                                                 | NYU Langone Health                                                       | Departments of Pathology and Medicine, New York University School of Medicine                      | Adriana Heguy, Dacia Dimartino, Emily Guzman, Christian Marier, Peter Meyn, Sitharam Ramaswami, Gael Westby, Paul Zappile, Yutong Zhang, Paolo Cotzia, Guiqing Wang                                                                                                                                                                                                                                                                                                                                                                                                                                                                                                                                                                                                |
| EPI_ISL_966312                                                                                                                                                                                                                                                                                                                                                                                                                                                                                                                                                 | Toronto Invasive Bacterial Diseases Network                              | McMaster University                                                                                | Allison McGeer, Patryk Aftanas, Hooman Derakhshani, Angel Li, Kuganya Nirmalarajah, Emily Panousis, Ahmed Draia, Jalees Nasir, Michael Surette, Samira Mubareka, Andrew G. McArthur                                                                                                                                                                                                                                                                                                                                                                                                                                                                                                                                                                                |
| EPI_ISL_966337                                                                                                                                                                                                                                                                                                                                                                                                                                                                                                                                                 | Kansas Health and Environmental Lab                                      | Kansas Health and Environmental Lab                                                                | Mike Grose, Paige Drury, Carissa Robertson, Ben Olsen, and Phil Adam                                                                                                                                                                                                                                                                                                                                                                                                                                                                                                                                                                                                                                                                                               |
| EPI_ISL_966402                                                                                                                                                                                                                                                                                                                                                                                                                                                                                                                                                 | OCME Office Of Chief Medical Examiner                                    | New York City Public Health Laboratory                                                             | Jade Wang, et al.                                                                                                                                                                                                                                                                                                                                                                                                                                                                                                                                                                                                                                                                                                                                                  |
| EPI_ISL_966404                                                                                                                                                                                                                                                                                                                                                                                                                                                                                                                                                 | DOHMH PHL                                                                | New York City Public Health Laboratory                                                             | Jade Wang, et al.                                                                                                                                                                                                                                                                                                                                                                                                                                                                                                                                                                                                                                                                                                                                                  |
| EPI_ISL_966457                                                                                                                                                                                                                                                                                                                                                                                                                                                                                                                                                 | OCME Office Of Chief Medical Examiner                                    | New York City Public Health Laboratory                                                             | Jade Wang, et al.                                                                                                                                                                                                                                                                                                                                                                                                                                                                                                                                                                                                                                                                                                                                                  |
| EPI_ISL_966459                                                                                                                                                                                                                                                                                                                                                                                                                                                                                                                                                 | DOHMH Corona                                                             | New York City Public Health Laboratory                                                             | Jade Wang, et al.                                                                                                                                                                                                                                                                                                                                                                                                                                                                                                                                                                                                                                                                                                                                                  |
| EPI_ISL_966463                                                                                                                                                                                                                                                                                                                                                                                                                                                                                                                                                 | DOHMH Jamaica                                                            | New York City Public Health Laboratory                                                             | Jade Wang, et al.                                                                                                                                                                                                                                                                                                                                                                                                                                                                                                                                                                                                                                                                                                                                                  |
| EPI_ISL_966476, EPI_ISL_966477                                                                                                                                                                                                                                                                                                                                                                                                                                                                                                                                 | DOHMH Corona                                                             | New York City Public Health Laboratory                                                             | Jade Wang, et al.                                                                                                                                                                                                                                                                                                                                                                                                                                                                                                                                                                                                                                                                                                                                                  |
| EPI_ISL_966485                                                                                                                                                                                                                                                                                                                                                                                                                                                                                                                                                 | OCME Office Of Chief Medical Examiner                                    | New York City Public Health Laboratory                                                             | Jade Wang, et al.                                                                                                                                                                                                                                                                                                                                                                                                                                                                                                                                                                                                                                                                                                                                                  |
| EPI_ISL_966549                                                                                                                                                                                                                                                                                                                                                                                                                                                                                                                                                 | NYU Langone Health                                                       | Departments of Pathology and Medicine, New York University School of Medicine                      | Adriana Heguy, Dacia Dimartino, Emily Guzman, Christian Marier, Peter Meyn, Sitharam Ramaswami, Gael Westby, Paul Zappile, Yutong Zhang, Paolo Cotzia, Guiqing Wang                                                                                                                                                                                                                                                                                                                                                                                                                                                                                                                                                                                                |
| EPI_ISL_966606, EPI_ISL_966676, EPI_ISL_966731, EPI_ISL_966743                                                                                                                                                                                                                                                                                                                                                                                                                                                                                                 | Helix/Illumina                                                           | Respiratory Viruses Branch, Division of Viral Diseases, Centers for Disease Control and Prevention | Peter W. Cook,Dakota Howard,Dhwani Batra,Ben L. Rambo-Martin,Eileen de Feo,Jan Antico,Christine Tran,Matthew Tolentino,Shannon Wickline,Kim Gietzen,Brad Sickler,Jingtao Liu,Eric Allen,Phil Febbo,Summer Galloway,Nicole L. Washington,Simon White,Geraint Levan,Kelly Schiabor Barrett,Elizabeth Cirulli,Alexandre Bolze,Ary Ascencio,Charlotte Rivera-Garcia,Ryan Cho,Jason Nguyen,Sherry Wang,Jimmy Ramirez,Tyler Cassens,Efren Sandoval,Magnus Isaksson,William Lee,David Becker,Marc Laurent,James Lu,Clinton R. Paden,Suxiang Tong,Duncan MacCannell,                                                                                                                                                                                                       |
| EPI_ISL_966851                                                                                                                                                                                                                                                                                                                                                                                                                                                                                                                                                 | Maine HETL                                                               | Tewhey Lab, The Jackson Laboratory                                                                 | Matluk,N., Dewey,H., Iosue,F., Barter,M., Lynch,R., Munger,H. and Tewhey,R.                                                                                                                                                                                                                                                                                                                                                                                                                                                                                                                                                                                                                                                                                        |
| EPI_ISL_966859, EPI_ISL_966876, EPI_ISL_966943, EPI_ISL_966946, EPI_ISL_966960, EPI_ISL_966972, EPI_ISL_966994, EPI_ISL_967012, EPI_ISL_967054, EPI_ISL_967075, EPI_ISL_967083, EPI_ISL_967224, EPI_ISL_967246, EPI_ISL_967264, EPI_ISL_967323, EPI_ISL_967365, EPI_ISL_967366, EPI_ISL_967446, EPI_ISL_967482                                                                                                                                                                                                                                                 | see above                                                                | Respiratory Viruses Branch, Division of Viral Diseases, Centers for Disease Control and Prevention | Peter W. Cook,Dakota Howard,Dhwani Batra,Ben L. Rambo-Martin,Eileen de Feo,Jan Antico,Christine Tran,Matthew Tolentino,Shannon Wickline,Kim Gietzen,Brad Sickler,Jingtao Liu,Eric Allen,Phil Febbo,Summer Galloway,Nicole L. Washington,Simon White,Geraint Levan,Kelly Schiabor Barrett,Elizabeth Cirulli,Alexandre Bolze,Ary Ascencio,Charlotte Rivera-Garcia,Ryan Cho,Jason Nguyen,Sherry Wang,Jimmy Ramirez,Tyler Cassens,Efren Sandoval,Magnus Isaksson,William Lee,David Becker,Marc Laurent,James Lu,Clinton R. Paden,Suxiang Tong,Duncan MacCannell,                                                                                                                                                                                                       |
| EPI_ISL_967523, EPI_ISL_967527, EPI_ISL_967528, EPI_ISL_967540, EPI_ISL_967541, EPI_ISL_967545                                                                                                                                                                                                                                                                                                                                                                                                                                                                 | State Laboratories Division, Hawaii State Department of Health           | State Laboratories Division, Hawaii State Department of Health                                     | Pamela O'Brien, Drew Kuwazaki, Ayana Garnet, Razvan Sultana, Edward Desmond                                                                                                                                                                                                                                                                                                                                                                                                                                                                                                                                                                                                                                                                                        |
| EPI_ISL_967554                                                                                                                                                                                                                                                                                                                                                                                                                                                                                                                                                 | Helix/Illumina                                                           | Respiratory Viruses Branch, Division of Viral Diseases, Centers for Disease Control and Prevention | Peter W. Cook,Dakota Howard,Dhwani Batra,Ben L. Rambo-Martin,Eileen de Feo,Jan Antico,Christine Tran,Matthew Tolentino,Shannon Wickline,Kim Gietzen,Brad Sickler,Jingtao Liu,Eric Allen,Phil Febbo,Summer Galloway,Nicole L. Washington,Simon White,Geraint Levan,Kelly Schiabor Barrett,Elizabeth Cirulli,Alexandre Bolze,Ary Ascencio,Charlotte Rivera-Garcia,Ryan Cho,Jason Nguyen,Sherry Wang,Jimmy Ramirez,Tyler Cassens,Efren Sandoval,Magnus Isaksson,William Lee,David Becker,Marc Laurent,James Lu,Clinton R. Paden,Suxiang Tong,Duncan MacCannell,                                                                                                                                                                                                       |
| EPI_ISL_967556, EPI_ISL_967574, EPI_ISL_967581, EPI_ISL_967585, EPI_ISL_967587, EPI_ISL_967594, EPI_ISL_967596, EPI_ISL_967597, EPI_ISL_967600, EPI_ISL_967604, EPI_ISL_967605, EPI_ISL_967618, EPI_ISL_967621, EPI_ISL_967636, EPI_ISL_967641, EPI_ISL_967648, EPI_ISL_967650, EPI_ISL_967651, EPI_ISL_967652, EPI_ISL_967657, EPI_ISL_967666, EPI_ISL_967673, EPI_ISL_967694, EPI_ISL_967698, EPI_ISL_967720, EPI_ISL_967725, EPI_ISL_967732, EPI_ISL_967735, EPI_ISL_967739, EPI_ISL_967741, EPI_ISL_967742, EPI_ISL_967744, EPI_ISL_967747, EPI_ISL_967754 | see above                                                                | State Laboratories Division, Hawaii State Department of Health                                     | Pamela O'Brien, Drew Kuwazaki, Ayana Garnet, Razvan Sultana, Edward Desmond                                                                                                                                                                                                                                                                                                                                                                                                                                                                                                                                                                                                                                                                                        |
| EPI_ISL_967761, EPI_ISL_967767, EPI_ISL_967845                                                                                                                                                                                                                                                                                                                                                                                                                                                                                                                 | Helix/Illumina                                                           | Respiratory Viruses Branch, Division of Viral Diseases, Centers for Disease Control and Prevention | Peter W. Cook,Dakota Howard,Dhwani Batra,Ben L. Rambo-Martin,Eileen de Feo,Jan Antico,Christine Tran,Matthew Tolentino,Shannon Wickline,Kim Gietzen,Brad Sickler,Jingtao Liu,Eric Allen,Phil Febbo,Summer Galloway,Nicole L. Washington,Simon White,Geraint Levan,Kelly Schiabor Barrett,Elizabeth Cirulli,Alexandre Bolze,Ary Ascencio,Charlotte Rivera-Garcia,Ryan Cho,Jason Nguyen,Sherry Wang,Jimmy Ramirez,Tyler Cassens,Efren Sandoval,Magnus Isaksson,William Lee,David Becker,Marc Laurent,James Lu,Clinton R. Paden,Suxiang Tong,Duncan MacCannell,                                                                                                                                                                                                       |
| EPI_ISL_967907, EPI_ISL_967946                                                                                                                                                                                                                                                                                                                                                                                                                                                                                                                                 | TGen North                                                               | Sonora Quest Laboratories                                                                          | "Jolene Bowers, Megan Folkerts, Chris French, Hayley Yaglom, Ashlyn Pfeiffer, Darrin Lemmer, Dave Engelthaler, The Arizona COVID Genomics Union (ACGU)"                                                                                                                                                                                                                                                                                                                                                                                                                                                                                                                                                                                                            |



|                                                                                                                                                |                                                                                                          |                                                                                                                                                |                                                                                                                                                                                                                                                                                                                                                                                                                                                                                                                                                              |
|------------------------------------------------------------------------------------------------------------------------------------------------|----------------------------------------------------------------------------------------------------------|------------------------------------------------------------------------------------------------------------------------------------------------|--------------------------------------------------------------------------------------------------------------------------------------------------------------------------------------------------------------------------------------------------------------------------------------------------------------------------------------------------------------------------------------------------------------------------------------------------------------------------------------------------------------------------------------------------------------|
| EPI_ISL_967953                                                                                                                                 | TGen North                                                                                               | TGen North                                                                                                                                     | "Jolene Bowers, Megan Folkerts, Chris French, Hayley Yaglom, Ashlyn Pfeiffer, Darrin Lemmer, Dave Engelthaler, The Arizona COVID Genomics Union (ACGU)"                                                                                                                                                                                                                                                                                                                                                                                                      |
| EPI_ISL_967958                                                                                                                                 | TGen North                                                                                               | Sonora Quest Laboratories                                                                                                                      | "Jolene Bowers, Megan Folkerts, Chris French, Hayley Yaglom, Ashlyn Pfeiffer, Darrin Lemmer, Dave Engelthaler, The Arizona COVID Genomics Union (ACGU)"                                                                                                                                                                                                                                                                                                                                                                                                      |
| EPI_ISL_967970                                                                                                                                 | TGen North                                                                                               | TGen North                                                                                                                                     | "Jolene Bowers, Megan Folkerts, Chris French, Hayley Yaglom, Ashlyn Pfeiffer, Darrin Lemmer, Dave Engelthaler, The Arizona COVID Genomics Union (ACGU)"                                                                                                                                                                                                                                                                                                                                                                                                      |
| EPI_ISL_968036                                                                                                                                 | TGen North                                                                                               | Sonora Quest Laboratories                                                                                                                      | "Jolene Bowers, Megan Folkerts, Chris French, Hayley Yaglom, Ashlyn Pfeiffer, Darrin Lemmer, Dave Engelthaler, The Arizona COVID Genomics Union (ACGU)"                                                                                                                                                                                                                                                                                                                                                                                                      |
| EPI_ISL_968205, EPI_ISL_968206, EPI_ISL_968207                                                                                                 | Arizona State Public Health Laboratory                                                                   | Arizona State Public Health Laboratory                                                                                                         | Trung Huynh, Jessica Escobar, Katherine Fullerton, Nobuko Fukushima, Stacy White, Linda Getsinger, Victor Waddell                                                                                                                                                                                                                                                                                                                                                                                                                                            |
| EPI_ISL_968350, EPI_ISL_968361, EPI_ISL_968377, EPI_ISL_968438                                                                                 | BCCDC Public Health Laboratory                                                                           | BCCDC Public Health Laboratory                                                                                                                 | Prystajecy Natalie, Linda Hoang, Dan Fornika, John Tyson, Shannon Russell, Kim Macdonald, Kimia Kamelian, Ana Pacagnella, Corrinne Ng, Loretta Janz, Robert Azana Terry Snutch, Mel Kraijden                                                                                                                                                                                                                                                                                                                                                                 |
| EPI_ISL_968858                                                                                                                                 | KEMRI-Wellcome Trust Research Programme/KEMRI-CGMR-C Kilifi                                              | KEMRI-Wellcome Trust Research Programme/KEMRI-CGMR-C Kilifi                                                                                    | Githinji et al                                                                                                                                                                                                                                                                                                                                                                                                                                                                                                                                               |
| EPI_ISL_970480, EPI_ISL_970610                                                                                                                 | BCCDC Public Health Laboratory                                                                           | BCCDC Public Health Laboratory                                                                                                                 | Prystajecy Natalie, Linda Hoang, Dan Fornika, John Tyson, Shannon Russell, Kim Macdonald, Kimia Kamelian, Ana Pacagnella, Corrinne Ng, Loretta Janz, Robert Azana Terry Snutch, Mel Kraijden                                                                                                                                                                                                                                                                                                                                                                 |
| EPI_ISL_970885, EPI_ISL_971557, EPI_ISL_971815, EPI_ISL_972288, EPI_ISL_972556, EPI_ISL_973064                                                 | Department of Virus and Microbiological Special Diagnostics, Statens Serum Institut, Copenhagen, Denmark | Aalborg University                                                                                                                             | Danish Covid-19 Genome Consortium                                                                                                                                                                                                                                                                                                                                                                                                                                                                                                                            |
| EPI_ISL_974207, EPI_ISL_974252, EPI_ISL_976749                                                                                                 | BCCDC Public Health Laboratory                                                                           | BCCDC Public Health Laboratory                                                                                                                 | Prystajecy Natalie, Linda Hoang, Dan Fornika, John Tyson, Shannon Russell, Kim Macdonald, Kimia Kamelian, Ana Pacagnella, Corrinne Ng, Loretta Janz, Robert Azana Terry Snutch, Mel Kraijden                                                                                                                                                                                                                                                                                                                                                                 |
| EPI_ISL_976925                                                                                                                                 | University of Massachusetts Medical School                                                               | Infectious Disease Program, Broad Institute of Harvard and MIT                                                                                 | Lemieux,J.E., Siddle,K.J., Ward,D., Ellison,R., Adams,G., Gladden-Young,A., Lagerborg,K., Rudy,M., DeRuff,K., Carter,A., Normandin,E., Bauer,M., Reilly,S., Tomkins-Tinch,C., Loreth,C., Chaluvasi,S., Birren,B.W., Gallagher,G., Smole,S., Park,D.J., MacInnis,B.L., and Sabeti,P.C.                                                                                                                                                                                                                                                                        |
| EPI_ISL_976990, EPI_ISL_977000, EPI_ISL_977016                                                                                                 | Broad Institute Clinical Research Sequencing Platform                                                    | Infectious Disease Program, Broad Institute of Harvard and MIT                                                                                 | Lemieux,J.E., Siddle,K.J., Adams,G., Gladden-Young,A., Lagerborg,K., Rudy,M., DeRuff,K., Carter,A., Normandin,E., Bauer,M., Reilly,S., Tomkins-Tinch,C., Loreth,C., Chaluvasi,S., Birren,B.W., Gallagher,G., Smole,S., Park,D.J., MacInnis,B.L., and Sabeti,P.C.                                                                                                                                                                                                                                                                                             |
| EPI_ISL_977051, EPI_ISL_977072                                                                                                                 | Rhode Island Department of Health                                                                        | Infectious Disease Program, Broad Institute of Harvard and MIT                                                                                 | Lemieux,J.E., Siddle,K.J., Huard,R., King,E., Azevedo,K., Miller,A., Adams,G., Gladden-Young,A., Lagerborg,K., Rudy,M., DeRuff,K., Carter,A., Normandin,E., Bauer,M., Reilly,S., Tomkins-Tinch,C., Loreth,C., Chaluvasi,S., Birren,B.W., Gallagher,G., Smole,S., Park,D.J., MacInnis,B.L., and Sabeti,P.C.                                                                                                                                                                                                                                                   |
| EPI_ISL_977563, EPI_ISL_977564                                                                                                                 | Nigeria Centre of Disease Control (NCDC)                                                                 | African Centre of Excellence for Genomics of Infectious Diseases (ACEGID), Redeemer's University                                               | Olawoye I. B. et al                                                                                                                                                                                                                                                                                                                                                                                                                                                                                                                                          |
| EPI_ISL_977569                                                                                                                                 | University of Michigan Clinical Microbiology Laboratory                                                  | Lauring Lab, University of Michigan, Department of Microbiology and Immunology                                                                 | Valesano                                                                                                                                                                                                                                                                                                                                                                                                                                                                                                                                                     |
| EPI_ISL_978137                                                                                                                                 | Chiu Laboratory, University of California, San Francisco                                                 | Chiu Laboratory, University of California, San Francisco                                                                                       | Charles Chiu, Xianding (Wayne) Deng, Candace Wang, Venice Servellita, Jill Hacker, Debra Wadford                                                                                                                                                                                                                                                                                                                                                                                                                                                             |
| EPI_ISL_978181, EPI_ISL_978188, EPI_ISL_978191                                                                                                 | Virginia Division of Consolidated Laboratory Services                                                    | Virginia Division of Consolidated Laboratory Services                                                                                          | Virginia DCLS                                                                                                                                                                                                                                                                                                                                                                                                                                                                                                                                                |
| EPI_ISL_978461                                                                                                                                 | Arizona State Public Health Laboratory                                                                   | Arizona State Public Health Laboratory                                                                                                         | Trung Huynh, Jessica Escobar, Katherine Fullerton, Nobuko Fukushima, Stacy White, Linda Getsinger, Victor Waddell                                                                                                                                                                                                                                                                                                                                                                                                                                            |
| EPI_ISL_978603, EPI_ISL_978636, EPI_ISL_978671, EPI_ISL_978685, EPI_ISL_978711, EPI_ISL_978726, EPI_ISL_978753                                 | Helix/Illumina                                                                                           | Respiratory Viruses Branch, Division of Viral Diseases, Centers for Disease Control and Prevention                                             | Peter W. Cook,Dakota Howard,Dhwani Batra,Ben L. Rambo-Martin,Eileen de Feo,Jan Antico,Christine Tran,Matthew Tolentino,Shannon Wickline,Kim Gietzen,Brad Sickler,Jingtao Liu,Eric Allen,Phil Febbo,Summer Galloway,Nicole L. Washington,Simon White,Geraint Levan,Kelly Schiabor Barrett,Elizabeth Cirulli,Alexandre Bolze,Ary Ascencio,Charlotte Rivera-Garcia,Ryan Cho,Jason Nguyen,Sherry Wang,Jimmy Ramirez,Tyler Cassens,Efren Sandoval,Magnus Isaksson,William Lee,David Becker,Marc Laurent,James Lu,Clinton R. Paden,Suxiang Tong,Duncan MacCannell, |
| EPI_ISL_979391                                                                                                                                 | Houston Health Dept.                                                                                     | Houston Health Dept.                                                                                                                           | Ryker Penn, Pamela Brown, Adolpho Lara                                                                                                                                                                                                                                                                                                                                                                                                                                                                                                                       |
| EPI_ISL_979414                                                                                                                                 | New Mexico Department of Health Scientific Laboratory                                                    | New Mexico Department of Health Scientific Laboratory                                                                                          | Ellie Johnson, Anastacia Griego-Fisher, D'eltra Malone, Jennifer Benoit                                                                                                                                                                                                                                                                                                                                                                                                                                                                                      |
| EPI_ISL_979462, EPI_ISL_979478, EPI_ISL_979490                                                                                                 | Eurofins Diatherix                                                                                       | Hudsonalpha Genome Sequencing Center                                                                                                           | Jane Grimwood, Melissa Williams, Lori H. Handley, Joshua Stough, Leslie Malone, Stefan Brzezinski, Ada Stewart, Teresa Jones, Jenell Webber, John Lovell, Jennifer Cart, and Jeremy Schmutz                                                                                                                                                                                                                                                                                                                                                                  |
| EPI_ISL_979760                                                                                                                                 | Humboldt County Public Health Laboratory                                                                 | Chan-Zuckerberg Biohub                                                                                                                         | CZB Cliahub Consortium                                                                                                                                                                                                                                                                                                                                                                                                                                                                                                                                       |
| EPI_ISL_980503, EPI_ISL_980504                                                                                                                 | Lighthouse Lab in Cambridge                                                                              | Wellcome Sanger Institute for the COVID-19 Genomics UK (COG-UK) Consortium                                                                     | Rob Howes, The Lighthouse Lab in Cambridge and Alex Alderton, Roberto Amato, Sonia Goncalves, Ewan Harrison, David K. Jackson, Ian Johnston, Dominic Kwiatkowski, Cordelia Langford, John Sillitoe on behalf of the Wellcome Sanger Institute COVID-19 Surveillance Team                                                                                                                                                                                                                                                                                     |
| EPI_ISL_981039, EPI_ISL_981040                                                                                                                 | Hospital Privado Regional                                                                                | Laboratorio Central Mg. Luis Alfredo Piaciola on behalf of 'Proyecto Argentino Interinstitucional de genómica de SARS-CoV-2' (PAIS Consortium) | L Piaciola, M Mazzeo, C Ziehm, C Pintos, M Fernandez, J Ousset, M Nabaes, M Viegas.                                                                                                                                                                                                                                                                                                                                                                                                                                                                          |
| EPI_ISL_981042, EPI_ISL_981043, EPI_ISL_981044, EPI_ISL_981045                                                                                 | Hospital Bariloche                                                                                       | Laboratorio Central Mg. Luis Alfredo Piaciola on behalf of 'Proyecto Argentino Interinstitucional de genómica de SARS-CoV-2' (PAIS Consortium) | L Piaciola, M Mazzeo, C Ziehm, C Pintos, M Fernandez, J Ousset, M Nabaes, M Viegas.                                                                                                                                                                                                                                                                                                                                                                                                                                                                          |
| EPI_ISL_981046                                                                                                                                 | Hospital Jacobacci                                                                                       | Laboratorio Central Mg. Luis Alfredo Piaciola on behalf of 'Proyecto Argentino Interinstitucional de genómica de SARS-CoV-2' (PAIS Consortium) | L Piaciola, M Mazzeo, C Ziehm, C Pintos, M Fernandez, J Ousset, M Nabaes, M Viegas.                                                                                                                                                                                                                                                                                                                                                                                                                                                                          |
| EPI_ISL_981053                                                                                                                                 | Hospital Dr. Francisco López Lima                                                                        | Laboratorio Central Mg. Luis Alfredo Piaciola on behalf of 'Proyecto Argentino Interinstitucional de genómica de SARS-CoV-2' (PAIS Consortium) | L Piaciola, M Mazzeo, C Ziehm, C Pintos, M Fernandez, J Ousset, M Nabaes, M Viegas.                                                                                                                                                                                                                                                                                                                                                                                                                                                                          |
| EPI_ISL_981100, EPI_ISL_981173, EPI_ISL_981174                                                                                                 | Johns Hopkins Hospital Department of Pathology                                                           | Johns Hopkins Hospital Department of Pathology                                                                                                 | C. Paul Morris, Chun Hual Luo, Adannaya Amadi, Matthew Schwartz, Nicholas Gallagher, Heba H. Mostafa                                                                                                                                                                                                                                                                                                                                                                                                                                                         |
| EPI_ISL_982060, EPI_ISL_982066                                                                                                                 | TGen North                                                                                               | Sonora Quest Laboratories                                                                                                                      | "Jolene Bowers, Megan Folkerts, Chris French, Hayley Yaglom, Ashlyn Pfeiffer, Darrin Lemmer, Dave Engelthaler, The Arizona COVID Genomics Union (ACGU)"                                                                                                                                                                                                                                                                                                                                                                                                      |
| EPI_ISL_982105                                                                                                                                 | TGen North                                                                                               | TGen North                                                                                                                                     | "Jolene Bowers, Megan Folkerts, Chris French, Hayley Yaglom, Ashlyn Pfeiffer, Darrin Lemmer, Dave Engelthaler, The Arizona COVID Genomics Union (ACGU)"                                                                                                                                                                                                                                                                                                                                                                                                      |
| EPI_ISL_982344, EPI_ISL_982358                                                                                                                 | M Health Fairview                                                                                        | Minnesota Department of Health, Public Health Laboratory                                                                                       | Alexandra Lorentz, Jacob Garfin, Matt Plumb, and Xiong Wang                                                                                                                                                                                                                                                                                                                                                                                                                                                                                                  |
| EPI_ISL_982427, EPI_ISL_982428, EPI_ISL_982436, EPI_ISL_982437, EPI_ISL_982440, EPI_ISL_982441, EPI_ISL_982450, EPI_ISL_982463, EPI_ISL_982469 | MONTEFIORE MEDICAL CENTER LABORATORIES                                                                   | Wadsworth Center, New York State Department of Health                                                                                          | Kirsten St. George, Daryl M. Lamson, Alexis Russel, Matthew Shudt, Melissa A Leisner, Jonathan Plitnick, Navjot Singh, John Kelly, Erasmus Schneider, Erica Lasek-Nesselquist                                                                                                                                                                                                                                                                                                                                                                                |

|                                                                                                                                                                                                                |                                                                           |                                                                                                               |                                                                                                                                                                                                                                                                                                                                                                                                             |
|----------------------------------------------------------------------------------------------------------------------------------------------------------------------------------------------------------------|---------------------------------------------------------------------------|---------------------------------------------------------------------------------------------------------------|-------------------------------------------------------------------------------------------------------------------------------------------------------------------------------------------------------------------------------------------------------------------------------------------------------------------------------------------------------------------------------------------------------------|
| EPI_ISL_982512                                                                                                                                                                                                 | Kentucky State Public Health Lab                                          | Kentucky State Public Health Lab                                                                              | Stephanie Lunn, Karim George, Joshua Tobias, William Grooms, Vaneet Arora, Matthew Johnson, Rachel Zinner, Rhonda Lucas                                                                                                                                                                                                                                                                                     |
| EPI_ISL_982655, EPI_ISL_982656, EPI_ISL_982668, EPI_ISL_982738, EPI_ISL_982753, EPI_ISL_982754                                                                                                                 | US Air Force School of Aerospace Medicine                                 | US Air Force School of Aerospace Medicine                                                                     | Anthony Fries, Jennifer Meyer, William Gruner, William Buggele, Amanda Javorina, Sarah Purves, Clarise Starr, Elizabeth Macias                                                                                                                                                                                                                                                                              |
| EPI_ISL_983042                                                                                                                                                                                                 | University Health Network/Mount Sinai Hospital Department of Microbiology | Ontario Institute for Cancer Research                                                                         | Marie-Ming Aynaud, Javier Hernandez, Seda Barutcu, Kin Chan, Jessica Bourke, Marc Mazzulli, Tony Mazzulli, Laurence Pelletier, Jeff Wrana, Aimee Paterson, Angel Liu, Allison McGeer, Patryk Aftanas, Kuganya Nirmalarajah, Samira Mubareka, Ilinca Lungu, Cassandra Bergwerff, Lubaina Kothari, Bernard Lam, Paul Krzyzanowski, Michael Laszloffy, Lawrence E. Heisler, Richard de Borja, Jared T. Simpson |
| EPI_ISL_983105                                                                                                                                                                                                 | MONTEFIORE MEDICAL CENTER LABORATORIES                                    | Wadsworth Center, New York State Department of Health                                                         | Kirsten St. George, Daryl M. Lamson, Alexis Russel, Matthew Shudt, Melissa A Leisner, Jonathan Plitnick, Navjot Singh, John Kelly, Erasmus Schneider, Erica Lasek-Nesselquist                                                                                                                                                                                                                               |
| EPI_ISL_983117                                                                                                                                                                                                 | SUNY UPSTATE MEDICAL UNIVERSITY                                           | Wadsworth Center, New York State Department of Health                                                         | Kirsten St. George, Daryl M. Lamson, Alexis Russel, Matthew Shudt, Melissa A Leisner, Jonathan Plitnick, Navjot Singh, John Kelly, Erasmus Schneider, Erica Lasek-Nesselquist                                                                                                                                                                                                                               |
| EPI_ISL_983150, EPI_ISL_983158, EPI_ISL_983163                                                                                                                                                                 | MONTEFIORE MEDICAL CENTER LABORATORIES                                    | Wadsworth Center, New York State Department of Health                                                         | Kirsten St. George, Daryl M. Lamson, Alexis Russel, Matthew Shudt, Melissa A Leisner, Jonathan Plitnick, Navjot Singh, John Kelly, Erasmus Schneider, Erica Lasek-Nesselquist                                                                                                                                                                                                                               |
| EPI_ISL_983243                                                                                                                                                                                                 | SUNY UPSTATE MEDICAL UNIVERSITY                                           | Wadsworth Center, New York State Department of Health                                                         | Kirsten St. George, Daryl M. Lamson, Alexis Russel, Matthew Shudt, Melissa A Leisner, Jonathan Plitnick, Navjot Singh, John Kelly, Erasmus Schneider, Erica Lasek-Nesselquist                                                                                                                                                                                                                               |
| EPI_ISL_983253, EPI_ISL_983267                                                                                                                                                                                 | KALEIDA CENTER FOR LABORATORY MEDICINE                                    | Wadsworth Center, New York State Department of Health                                                         | Kirsten St. George, Daryl M. Lamson, Alexis Russel, Matthew Shudt, Melissa A Leisner, Jonathan Plitnick, Navjot Singh, John Kelly, Erasmus Schneider, Erica Lasek-Nesselquist                                                                                                                                                                                                                               |
| EPI_ISL_983283                                                                                                                                                                                                 | SUNY UPSTATE MEDICAL UNIVERSITY                                           | Wadsworth Center, New York State Department of Health                                                         | Kirsten St. George, Daryl M. Lamson, Alexis Russel, Matthew Shudt, Melissa A Leisner, Jonathan Plitnick, Navjot Singh, John Kelly, Erasmus Schneider, Erica Lasek-Nesselquist                                                                                                                                                                                                                               |
| EPI_ISL_983285, EPI_ISL_983288                                                                                                                                                                                 | KALEIDA CENTER FOR LABORATORY MEDICINE                                    | Wadsworth Center, New York State Department of Health                                                         | Kirsten St. George, Daryl M. Lamson, Alexis Russel, Matthew Shudt, Melissa A Leisner, Jonathan Plitnick, Navjot Singh, John Kelly, Erasmus Schneider, Erica Lasek-Nesselquist                                                                                                                                                                                                                               |
| EPI_ISL_983292, EPI_ISL_983308, EPI_ISL_983315, EPI_ISL_983316, EPI_ISL_983317, EPI_ISL_983319                                                                                                                 | SUNY UPSTATE MEDICAL UNIVERSITY                                           | Wadsworth Center, New York State Department of Health                                                         | Kirsten St. George, Daryl M. Lamson, Alexis Russel, Matthew Shudt, Melissa A Leisner, Jonathan Plitnick, Navjot Singh, John Kelly, Erasmus Schneider, Erica Lasek-Nesselquist                                                                                                                                                                                                                               |
| EPI_ISL_983438, EPI_ISL_983441, EPI_ISL_983442, EPI_ISL_983451, EPI_ISL_983452, EPI_ISL_983454, EPI_ISL_983461, EPI_ISL_983466, EPI_ISL_983467                                                                 | URMC LABS                                                                 | Wadsworth Center, New York State Department of Health                                                         | Kirsten St. George, Daryl M. Lamson, Alexis Russel, Matthew Shudt, Melissa A Leisner, Jonathan Plitnick, Navjot Singh, John Kelly, Erasmus Schneider, Erica Lasek-Nesselquist                                                                                                                                                                                                                               |
| EPI_ISL_983476                                                                                                                                                                                                 | Wadsworth Center, New York State Department of Health                     | Wadsworth Center, New York State Department of Health                                                         | Kirsten St. George, Daryl M. Lamson, Alexis Russel, Matthew Shudt, Melissa A Leisner, Jonathan Plitnick, Navjot Singh, John Kelly, Erasmus Schneider, Erica Lasek-Nesselquist                                                                                                                                                                                                                               |
| EPI_ISL_983479, EPI_ISL_983481                                                                                                                                                                                 | URMC LABS                                                                 | Wadsworth Center, New York State Department of Health                                                         | Kirsten St. George, Daryl M. Lamson, Alexis Russel, Matthew Shudt, Melissa A Leisner, Jonathan Plitnick, Navjot Singh, John Kelly, Erasmus Schneider, Erica Lasek-Nesselquist                                                                                                                                                                                                                               |
| EPI_ISL_983662, EPI_ISL_983664, EPI_ISL_983672, EPI_ISL_983696                                                                                                                                                 | Vault Health                                                              | Minnesota Department of Health, Public Health Laboratory                                                      | Alexandra Lorentz, Jacob Garfin, Matt Plumb, and Xiong Wang                                                                                                                                                                                                                                                                                                                                                 |
| EPI_ISL_983699, EPI_ISL_983700                                                                                                                                                                                 | Essentia Health-St. Mary's Medical Center                                 | Minnesota Department of Health, Public Health Laboratory                                                      | Alexandra Lorentz, Jacob Garfin, Matt Plumb, and Xiong Wang                                                                                                                                                                                                                                                                                                                                                 |
| EPI_ISL_983711, EPI_ISL_983718, EPI_ISL_983737, EPI_ISL_983779, EPI_ISL_983796, EPI_ISL_983808, EPI_ISL_983811, EPI_ISL_983817, EPI_ISL_983839, EPI_ISL_983849, EPI_ISL_983857, EPI_ISL_983858, EPI_ISL_983862 | see above                                                                 | Colorado Department of Public Health and Environment                                                          | Laura Bankers, Molly C. Hetherington-Rauth, Diana Ir, Shannon Ely, Shannon R. Matzinger, Sarah Elizabeth Totten, Emily A. Travanty                                                                                                                                                                                                                                                                          |
| EPI_ISL_983863, EPI_ISL_983864, EPI_ISL_983867                                                                                                                                                                 | Colorado Department of Public Health and Environment                      | Colorado Department of Puplic Health and Environment                                                          | Aline Campos, Cynthia Molina, Lara Crescente, Leticia Garay, Ludmila Fiorenzano Baethgen, Richard Salvato, Tatiana Gregianini                                                                                                                                                                                                                                                                               |
| EPI_ISL_983905, EPI_ISL_983909, EPI_ISL_984089, EPI_ISL_984123, EPI_ISL_984125, EPI_ISL_984168                                                                                                                 | Central Laboratory of Public Health of Rio Grande do Sul (Lacen-RS)       | State Center for Health Surveillance of the Health Department of the State of Rio Grande do Sul (CEVS/SES-RS) |                                                                                                                                                                                                                                                                                                                                                                                                             |
| EPI_ISL_984506, EPI_ISL_984523, EPI_ISL_984529, EPI_ISL_984558, EPI_ISL_984582                                                                                                                                 | Wisconsin State Laboratory of Hygiene Communicable Disease Division       | Wisconsin State Laboratory of Hygiene Communicable Disease Division                                           | Kelsey R. Florek, Abigail C. Shockey                                                                                                                                                                                                                                                                                                                                                                        |
| EPI_ISL_984619, EPI_ISL_984620, EPI_ISL_984621                                                                                                                                                                 | California Department of Public Health                                    | Chiu Laboratory, University of California, San Francisco                                                      | Charles Chiu, Xianding (Wayne) Deng, Candace Wang, Venice Servellita, Jill Hacker, Debra Wadford                                                                                                                                                                                                                                                                                                            |
| EPI_ISL_984784, EPI_ISL_984789, EPI_ISL_984790, EPI_ISL_984796, EPI_ISL_984873                                                                                                                                 | Central Laboratory of Public Health of Rio Grande do Sul (Lacen-RS)       | State Center for Health Surveillance of the Health Department of the State of Rio Grande do Sul (CEVS/SES-RS) | Aline Campos, Cynthia Molina, Lara Crescente, Leticia Garay, Ludmila Fiorenzano Baethgen, Richard Salvato, Tatiana Gregianini                                                                                                                                                                                                                                                                               |
| EPI_ISL_985163                                                                                                                                                                                                 | Pandemic Response Lab - NYC                                               | Pandemic Response Lab, R&D                                                                                    | Henry Lee, Michael Hammerling, Melissa Hopkins, Cybill del Castillo, William Ward, Pradeep Bugga, Haiping Hao, Jon Laurent                                                                                                                                                                                                                                                                                  |
| EPI_ISL_985265                                                                                                                                                                                                 | Instituto Nacional de Medicina Genomica                                   | Instituto Nacional de Medicina Genomica                                                                       | Hidalgo-Miranda A, Mendoza-Vargas A, Reyes-Grajeda JP, Cisneros-Villanueva M, Cedro-Tanda A, Peñaloza-Figueroa F, Herrera-Montalvo LA                                                                                                                                                                                                                                                                       |
| EPI_ISL_994847, EPI_ISL_994919, EPI_ISL_994933, EPI_ISL_994934, EPI_ISL_994997, EPI_ISL_995027, EPI_ISL_995073, EPI_ISL_995136, EPI_ISL_995142                                                                 | Delaware Public Health Laboratory (DPHL)                                  | Delaware Public Health Lab                                                                                    | Gregory Hovan                                                                                                                                                                                                                                                                                                                                                                                               |
|                                                                                                                                                                                                                | Pandemic Response Lab - NYC                                               | Pandemic Response Lab, R&D                                                                                    | Henry Lee, Michael Hammerling, Melissa Hopkins, Cybill del Castillo, William Ward, Pradeep Bugga, Haiping Hao, Jon Laurent                                                                                                                                                                                                                                                                                  |
